# Supplementary material for: Caesarean section rates analysed using Robson’s 10-Group Classification System: a cross-sectional study at a tertiary hospital in Ethiopia
Source: PubMed Central journal article supplement — BMJ Open. 2020 Oct 28;10(10):e039098. doi: 10.1136/bmjopen-2020-039098 (PMC7594350; doi:10.1136/bmjopen-2020-039098), 2020-10-28
Supplement: bmjopen-2020-039098.draft_revisions.pdf [file bmjopen-2020-039098.draft_revisions.pdf]

# BMJ Open

BMJ Open is committed to open peer review. As part of this commitment we make the peer review history of every article we publish publicly available.

When an article is published we post the peer reviewers' comments and the authors' responses online. We also post the versions of the paper that were used during peer review. These are the versions that the peer review comments apply to.

The versions of the paper that follow are the versions that were submitted during the peer review process. They are not the versions of record or the final published versions. They should not be cited or distributed as the published version of this manuscript.

BMJ Open is an open access journal and the full, final, typeset and author-corrected version of record of the manuscript is available on our site with no access controls, subscription charges or pay-per-view fees (<http://bmjopen.bmj.com>).

If you have any questions on BMJ Open's open peer review process please email [info.bmjopen@bmj.com](mailto:info.bmjopen@bmj.com)

# BMJ Open

## Caesarean section rates analysed using Robson's Ten Group Classification System: A descriptive study at a tertiary hospital in Ethiopia

|                               |                                                                                                                                                                                                                                                                                                                                                                                    |
|-------------------------------|------------------------------------------------------------------------------------------------------------------------------------------------------------------------------------------------------------------------------------------------------------------------------------------------------------------------------------------------------------------------------------|
| Journal:                      | <i>BMJ Open</i>                                                                                                                                                                                                                                                                                                                                                                    |
| Manuscript ID                 | bmjopen-2020-039098                                                                                                                                                                                                                                                                                                                                                                |
| Article Type:                 | Original research                                                                                                                                                                                                                                                                                                                                                                  |
| Date Submitted by the Author: | 08-Apr-2020                                                                                                                                                                                                                                                                                                                                                                        |
| Complete List of Authors:     | Abdo, Abdella; Hawassa University College of Medicine and Health Sciences, Epidemiology<br>Hinderaker , Sven ; University of Bergen Centre for International Health, Center for International Health<br>Tekle, Achemyelesh; Hawassa University College of Medicine and Health Sciences, Public Health<br>Lindtjørn , Bernt ; University of Bergen, Centre for International Health |
| Keywords:                     | PUBLIC HEALTH, Fetal medicine < OBSTETRICS, Maternal medicine < OBSTETRICS, Prenatal diagnosis < OBSTETRICS                                                                                                                                                                                                                                                                        |
|                               |                                                                                                                                                                                                                                                                                                                                                                                    |

SCHOLARONE™  
Manuscripts

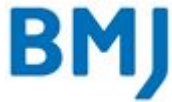

I, the Submitting Author has the right to grant and does grant on behalf of all authors of the Work (as defined in the below author licence), an exclusive licence and/or a non-exclusive licence for contributions from authors who are: i) UK Crown employees; ii) where BMJ has agreed a CC-BY licence shall apply, and/or iii) in accordance with the terms applicable for US Federal Government officers or employees acting as part of their official duties; on a worldwide, perpetual, irrevocable, royalty-free basis to BMJ Publishing Group Ltd ("BMJ") its licensees and where the relevant Journal is co-owned by BMJ to the co-owners of the Journal, to publish the Work in this journal and any other BMJ products and to exploit all rights, as set out in our [licence](#).

The Submitting Author accepts and understands that any supply made under these terms is made by BMJ to the Submitting Author unless you are acting as an employee on behalf of your employer or a postgraduate student of an affiliated institution which is paying any applicable article publishing charge ("APC") for Open Access articles. Where the Submitting Author wishes to make the Work available on an Open Access basis (and intends to pay the relevant APC), the terms of reuse of such Open Access shall be governed by a Creative Commons licence – details of these licences and which [Creative Commons](#) licence will apply to this Work are set out in our licence referred to above.

Other than as permitted in any relevant BMJ Author's Self Archiving Policies, I confirm this Work has not been accepted for publication elsewhere, is not being considered for publication elsewhere and does not duplicate material already published. I confirm all authors consent to publication of this Work and authorise the granting of this licence.

## Caesarean section rates analysed using Robson's Ten Group Classification System: A descriptive study at a tertiary hospital in Ethiopia

*Abdella Amano Abdo (AAA)<sup>1,2</sup>, Sven Gudmund Hinderaker (SGH)<sup>2</sup>, Achameyelesh Gebretsedik Tekle (AGT)<sup>1</sup>, Bernt Lindtjørn (BL)<sup>1,2</sup>*

E-mail address of the authors:

AAA: [a2ay.oro@gmail.com](mailto:a2ay.oro@gmail.com), Correspondent author

SGH: [Sven.Hinderaker@uib.no](mailto:Sven.Hinderaker@uib.no)

AGT: [achameyelesh9@yahoo.com](mailto:achameyelesh9@yahoo.com)

BL: [bernt.lindtjorn@uib.no](mailto:bernt.lindtjorn@uib.no)

### Abstract

**Objective:** The aim of this study was to assess the Caesarean section (CS) rates using Robson's Ten-Group Classification System among women who gave birth at Hawassa University Referral Hospital in Southern Ethiopia.

**Design:** Descriptive design analysing CS rates by Robson's categories from a birth registry

**Setting:** Hawassa University Referral Hospital in South Ethiopia.

**Participants:** 4004 women who gave birth in Hawassa University Referral Hospital from June 2018 to June 2019.

**Results:** The 4004 women gave birth to 4165 babies. The overall CS rate was 32.8% (95% CI: 31.4%, 34.3%). The major contributors to the overall CS rates were: Robson Group 1 (nulliparous women with singleton pregnancy at term in spontaneous labour) 22.9%; Group 5 (multiparous women with at least one previous CS) 21.4%, and Group 3 (multiparous women without previous CS, with singleton pregnancy in spontaneous labour) 17.3%. The most commonly reported indications for CS were "foetal compromise" (35.3%) followed by previous CS (20.3%) and obstructed labour (10.7%).

**Conclusion:** A high proportion of delivering women at this hospital were given a CS, and many of them were in a low risk group. Few had trial of labour. More active use of partogram and auditing the appropriateness of CS indications may help to reduce the CS rate.

## Strengths and limitations of this study

- It was the first study that assesses the CS rate using Robson ten group classification system for all labouring mothers in Ethiopia.
- The study used prospective birth registration, hence the risk of incomplete data minimized
- All women who gave birth in study hospital were included, reducing the risk for selection bias
- Since the study was conducted in single-hospital with high referral and most complicated cases, the finding might be less generalizable.
- The study used birth weight for gestational age determination for some mothers and the possibility of misclassification among the Robson group cannot be ruled out.

## Introduction

Caesarean section (CS) is a life-saving intervention for both the woman and new-born if a complication occurs during late pregnancy and childbirth. It is the most common surgical intervention in many countries (1). The proportion of births delivered by CS is used by the World Health Organization as an indicator of the provision of lifesaving services for both mothers and newborns (2). WHO suggest that in normal populations CS rates should not exceed 10-15 % (3). However, there is a growing concern about the increasing percentage of CS globally. The CS rates above 15% are not associated with improved maternal and neonatal health (4), and reasons for a CS may be other than medical; in some countries, for example, it may be a cost free option for expecting mothers.

CS performed for women who do not need it can have negative consequences for the mothers as well as their babies, especially when the procedure is done in the absence of adequate facilities, skills and comprehensive care (5). Though CS is effective in reducing maternal and neonatal mortality and morbidity, the procedure is also associated with increased maternal risk of infection, bleeding, blood transfusion, hysterectomy, and death compared to normal delivery (6). Indeed, even small operations carry some risks and must be compared with the risks of not undertaking the procedure. A woman who undergoes a CS will have a slightly increased risk for her subsequent babies to have foetal distress, preterm birth, and stillbirth (7-9).

In 2016, globally, the population-based CS rate varied from 6% to 27.2% (10), and the global rate of CS births had doubled over the last 15 years (11). In Ethiopia, the national population-based CS rate had been the lowest in the world (10), (12), but a national review conducted in 2011 covering 797 facilities indicated a CS rate of 15% in public facilities and 46.1% in privately owned facilities (13). The CS rate at a University hospital in eastern Ethiopia was 25.7% (14). Many of these facility-based CS rates represent a selected population of women, and hence not necessarily representing the CS rate in the population.

Though there is no consensus in defining the optimal CS rate at any level due to lack of reliable and internationally accepted classification system, the Ten-Group Classification System created by Robson has now been accepted and used in many countries (15, 16). This system helps

1 institution-specific monitoring and auditing and offers a standardized comparison method for use  
2 between institutions, countries, and time points (17).

3  
4 WHO has been recommending using this system to assess, monitor and compare CS rates since  
5 2015 (2), but it is not yet implemented in Ethiopia. A study on CS was conducted using  
6 Robson's classification system at a university hospital in eastern Ethiopia (14) but was limited to  
7 women who underwent CS, and was not done according to the Robson implementation manual  
8 (18). Therefore, the aim of our study was to determine CS rate using Ten-Group Classification  
9 System among all the women who gave birth at Hawassa University Referral Hospital in  
10 Southern Ethiopia in 2018/2019.  
11  
12  
13  
14  
15  
16  
17  
18

## 19 **Materials and Methods:**

### 20 **Study setting:**

21  
22 The study was conducted at Hawassa University Referral Hospital, which is 275 km to the south  
23 of Addis Ababa, the capital city of Ethiopia. The hospital provides health care services as both  
24 primary health care for Hawassa city and its nearby districts, and as tertiary care services for the  
25 region Southern Nation Nationalities and Peoples, including some neighbouring regions. It  
26 serves more than 15 million people in the catchment area. According to 2019 Ethiopian Mini  
27 Demographic and Health Survey report, 69.4%, 47.6% and 32% of the women had at least one  
28 antenatal care (ANC) follow up, health facility delivery and postnatal care follow up,  
29 respectively, in Southern Nation Nationalities and Peoples region (19). All pregnant women are  
30 encouraged to have a minimum of 4 ANC visit and to deliver at health facilities. Preventive  
31 services such as screening for HIV/AIDS, Syphilis, tetanus toxoid vaccination and iron folate  
32 supplementation are routinely given for pregnant mothers during their ANC follow up. Hawassa  
33 University Referral Hospital is providing both basic and comprehensive management of  
34 maternal, new-born and child health services for more than 4500 births annually. The  
35 Department of Obstetrics and Gynaecology had 6 obstetricians and gynaecologists, 80 midwives,  
36 and 39 nurses, as well as its own operation theatre for obstetrics cases.  
37  
38  
39  
40  
41  
42  
43  
44  
45  
46  
47  
48  
49  
50

### 51 **Study Design and participants**

52  
53 The design was descriptive and included all deliveries at the hospital between June 2018 and  
54 June 2019. A medical birth registry was adapted from the Kilimanjaro Christian Medical Centre  
55 in Tanzania (20) and used to collect the data.  
56  
57  
58  
59  
60

## Variables

The main outcome variable was the rate of CS, in all deliveries. Other variables were as follows: socio-demographic characteristics (maternal age, residence, educational status, occupational status), maternal characteristics (history of CS, parity, and gravidity), and pregnancy-related information (gestational age, foetal presentation, number of foetuses and onset of labour). For those women who underwent CS, information about the indications of CS was also collected.

The CS rates were categorised by the Robson classification system shown in Box 1 (18) using five delivery parameters: 1) *Foetal presentations* were classified as cephalic, breech or transverse/oblique. Gestational age was categorised as a term ( $\geq 37$  weeks) or preterm ( $< 37$  weeks). 2) *Gestational age* was assessed using early prenatal ultrasound or last menstrual period. In the case of no early ultrasound or unknown last menstrual period, a combination of physical examination, third-trimester ultrasound, and estimated foetal weight were used for estimation of gestational age. For cases with undocumented gestational age, we used a birth weight of  $\geq 2500$  grams as a proxy to term pregnancy. 3) The *onset of labour* was categorised as spontaneous, induced or CS before labour. 4) *Parity* was classified as nulliparous or multiparous. 5) The *number of foetuses* was categorised as singleton or multiples. We categorised the need for CS as “Absolute indication” and “Not absolute indication” (21).



**Box 1: Robson's 10-group classification**

| Group | Description                                                                                                                    |
|-------|--------------------------------------------------------------------------------------------------------------------------------|
| 1     | Nulliparous, singleton, cephalic, $\geq 37$ weeks' gestation, in spontaneous labour                                            |
| 2     | Nulliparous, singleton, cephalic, $\geq 37$ weeks' gestation, induced labour or CS before labour                               |
| 2a    | Labour induced                                                                                                                 |
| 2b    | Prelabour CS                                                                                                                   |
| 3     | Multiparous (excluding previous CS), singleton, cephalic, $\geq 37$ weeks' gestation, in spontaneous labour                    |
| 4     | Multiparous without a previous CS, with singleton, cephalic pregnancy, $\geq 37$ weeks' gestation, induced or CS before labour |
| 4a    | Labour induced                                                                                                                 |
| 4b    | Prelabour CS                                                                                                                   |
| 5     | Previous CS, singleton, cephalic, $\geq 37$ weeks' gestation                                                                   |
| 5.1   | With one previous CS                                                                                                           |
| 5.2   | With two or more previous CSs                                                                                                  |
| 6     | All nulliparous with a single breech                                                                                           |
| 7     | All multiparous with a single breech (including previous CS)                                                                   |
| 8     | All multiple pregnancies (including previous CS)                                                                               |
| 9     | All women with a single pregnancy in a transverse or oblique lie (including those with previous CS)                            |
| 10    | All singleton, cephalic, $< 37$ weeks' gestation pregnancies (including CS).                                                   |

Source: WHO. Robson classification. Geneva: WHO, 2017.

**Data collection**

Data was recorded by three midwives in the maternity ward. Data collectors and supervisors were trained and supervised by the Principal Investigator. Information about the socio-demographic characteristics of delivering mothers was collected through interviews at the time of admission if the women were stable or before discharge from the hospital. Information about CS was retrieved from the operation theatre register and double-checked with the midwives' delivery logbook and the admission and discharge registers. Completeness of data was checked by the Principal Investigator.

**Data processing and analysis**

All registered data were double entered using EpiData Version 3.1 (EpiData Association, Odense, Denmark) and consistency was checked and any necessary corrections were made before data analysis. Data were analysed using SPSS Version 25 (IBM, Chicago, IL).

1 Descriptive statistics with frequencies and percentages for categorical data, as well as means and  
2 standard deviation for numerical data, were used to summarize the data. The WHO Robson  
3 implementation manual was used to interpret the results of this study (18). For determining CS  
4 rate, we used those mothers with complete data on Robson's group parameters. Those mothers  
5 with missing data were excluded from analysis.  
6  
7  
8  
9

### 10 **Patient and Public involvement**

11  
12 Patients or public were not involved in the design, or conduct, or reporting, or dissemination plan  
13 of our research.  
14  
15  
16  
17  
18  
19  
20  
21  
22  
23  
24  
25  
26  
27  
28  
29  
30  
31  
32  
33  
34  
35  
36  
37  
38  
39  
40  
41  
42  
43  
44  
45  
46  
47  
48  
49  
50  
51  
52  
53  
54  
55  
56  
57  
58  
59  
60

For peer review only

## Results

In the 12-month study period, there were 4031 women coming to deliver at Hawassa Regional Hospital. Of these clients, 27 had incomplete records and were excluded, resulting in 4004 women giving birth to 4165 babies for analysis. The mean age of the women was 26 years. It ranged from 13 to 45 years. Their sociodemographic characteristics are shown in Table 1. We notice that many were urban dwellers and housewives, and most had some basic formal education.

For peer review only

**Table 1:** Socio-demographic characteristics of women who gave birth at Hawassa University Referral Hospital, Ethiopia, 2018.

| Variables            |                       | Number | Percent |
|----------------------|-----------------------|--------|---------|
| Total                |                       | 4004   | 100     |
| Maternal Age (Years) | <20                   | 187    | 4.7     |
|                      | 20-34                 | 3467   | 86.6    |
|                      | 35 and above          | 347    | 8.7     |
|                      | Not recorded          | 2      | 0.1     |
| Residence            | Urban                 | 3669   | 91.6    |
|                      | Rural                 | 318    | 7.9     |
|                      | Not recorded          | 17     | 0.4     |
| Educational level    | Cannot read and write | 283    | 7.1     |
|                      | Primary (1-8)         | 1741   | 43.5    |
|                      | Secondary (9-12)      | 1233   | 30.8    |
|                      | College and above     | 715    | 17.9    |
|                      | Not recorded          | 32     | 0.8     |
| Occupational status  | Housewife             | 2834   | 70.8    |
|                      | Merchant              | 307    | 7.7     |
|                      | Employer              | 624    | 15.6    |
|                      | Others*               | 167    | 4.2     |
|                      | Not recorded          | 72     | 1.8     |
| Marital status       | Married               | 3949   | 98.6    |
|                      | Single                | 29     | 0.7     |
|                      | Divorced/Widowed      | 9      | 0.2     |
|                      | Not recorded          | 17     | 0.4     |

\*Daily labourer, student, farmer

The obstetric characteristics of the study participants and the outcomes of the deliveries are given in Table 2. Two out of five (41.1%) of the study participants were primigravidae. Almost all of the study participants had had at least one ANC visit during this pregnancy. Of all deliveries, 15.1% were preterm. CS was performed on 1314 (32.8%) women, 165 (12.6%) of them planned.

**Table 2:** Obstetrics characteristics of women who gave birth and their outcomes, at Hawassa University Referral Hospital, Ethiopia.

| <b>Variables</b>                      |                        | <b>Number</b> | <b>Percent</b> |
|---------------------------------------|------------------------|---------------|----------------|
| Age at first marriage                 | 18 years or less       | 1091          | 27.2           |
|                                       | Above 18 years         | 2861          | 71.5           |
|                                       | Not recorded           | 52            | 1.3            |
| Age at first Pregnancy                | 18 years or less       | 748           | 18.7           |
|                                       | Above 18 years         | 3205          | 80.0           |
|                                       | Not recorded           | 50            | 1.3            |
| Parity                                | 0                      | 1646          | 41.1           |
|                                       | 1-4                    | 2185          | 54.6           |
|                                       | >4                     | 173           | 4.3            |
| ANC this pregnancy                    | Yes                    | 3931          | 98.2           |
|                                       | No                     | 57            | 1.4            |
|                                       | Not recorded           | 16            | 0.4            |
| Gestational Age                       | Pre-term (<37 weeks)   | 606           | 15.1           |
|                                       | Term (37-42 weeks)     | 3253          | 81.2           |
|                                       | Post-term (>42 weeks)  | 145           | 3.6            |
| Onset of labour                       | Induced                | 398           | 9.9            |
|                                       | Spontaneous            | 3441          | 85.9           |
|                                       | Pre-labour CS          | 165           | 4.2            |
| Foetal presentation                   | Cephalic               | 3844          | 96.0           |
|                                       | Breech                 | 143           | 3.6            |
|                                       | Transverse/Oblique     | 17            | 0.4            |
| Mode of Delivery                      | Spont.Vaginal Delivery | 2605          | 65.1           |
|                                       | Instrumental delivery  | 85            | 2.1            |
|                                       | CS                     | 1314          | 32.8           |
|                                       | CS emergency           | 1149          | 87.4           |
|                                       | CS planned             | 165           | 12.6           |
| Number of foetus at birth<br>(n=4165) | Singleton              | 3850          | 92.4           |
|                                       | Multiple               | 315           | 7.6            |

|                         |               |      |      |
|-------------------------|---------------|------|------|
| Type of multiple births | Twin          | 292  | 92.7 |
| (n=315)                 | Triplets      | 19   | 6.0  |
|                         | Quadruplets   | 4    | 1.3  |
| Birth Weight (in grams) | <2500         | 592  | 14.2 |
| (n=4165)                | 2500-4000     | 3355 | 80.6 |
|                         | >4000         | 188  | 4.5  |
|                         | Note recorded | 30   | 0.7  |
| Previous CS (n=2358)    | Yes           | 438  | 18.6 |
|                         | No            | 1920 | 81.4 |

Instrumental delivery includes; vacuum and forceps delivery. ANC- antenatal clinic visit, CS caesarean section

### Robson Ten Group Classification System

Table 3 shows the classification of women who delivered, according to Robson. We notice that the largest groups were: multiparous women without previous CS; women with a singleton pregnancy in spontaneous labour (group 3); nulliparous women with singleton pregnancy in spontaneous labour (group 1); and women with pre-term birth (group 10).

The overall CS rate in this study was 32.8% (95% CI: 31.4%, 34.3%). The major contributors to the overall CS rate were: Group 1 (nulliparous women with singleton pregnancy in spontaneous labour), group 5 (multiparous women with at least one previous CS) and group 3 (multiparous women without previous CS, with singleton pregnancy in spontaneous labour) (Table 3).

From an obstetrician's perspective, the most common indications for CS were foetal compromise, obstructed labour and previous CS (Figure 1). In this study, 227/1314 (17.3%) CS were performed for absolute maternal indications. For non-absolute indications, CS was performed in 968/1314 (73.7%) of cases, mainly non-reassuring foetal heartbeat pattern (foetal distress). The remaining 9.0% of CS could not be classified in this way, and included post-term pregnancy, premature rupture of membrane, multiple pregnancies, and polyhydramnios/oligohydramnios.

**Table 3.** Robson's Classification system among women who gave birth at Hawassa University Referral Hospital, Hawassa, South Ethiopia.

| Robson Group                                                                                           | CS in Group | Number in Group | Group size (%) | CS in group (%) | Absolute group contribution to overall CS rate (%) | Relative contribution of the group to the overall CS rate (%) |
|--------------------------------------------------------------------------------------------------------|-------------|-----------------|----------------|-----------------|----------------------------------------------------|---------------------------------------------------------------|
| <b>Group 1</b> (nulliparous with singleton pregnancy in spontaneous labour)                            | 301         | 1094            | 27.3           | 27.5            | 7.5                                                | 22.9                                                          |
| <b>Group 2</b> (nulliparous women with singleton pregnancy who had induced labour or pre-labour CS)    | 97          | 227             | 5.7            | 42.7            | 2.4                                                | 7.4                                                           |
| <b>Group 2a</b> (induced labour)                                                                       | 55          | 185             | 4.6            | 29.7            | 1.4                                                | 4.2                                                           |
| <b>Group 2b</b> (pre-labour CS)                                                                        | 42          | 42              | 1.1            | 100.0           | 1.0                                                | 3.2                                                           |
| <b>Group 3</b> (multiparous women without previous CS, with singleton pregnancy in spontaneous labour) | 227         | 1356            | 33.9           | 16.7            | 5.7                                                | 17.3                                                          |
| <b>Group 4</b> (multiparous without previous CS, singleton with induced labour or pre-labour CS)       | 68          | 158             | 3.9            | 43.0            | 1.7                                                | 5.2                                                           |
| <b>Group 4a</b> (induced labour)                                                                       | 33          | 123             | 3.1            | 26.8            | 0.8                                                | 2.5                                                           |
| <b>Group 4b</b> (pre-labour CS)                                                                        | 35          | 35              | 0.8            | 100.0           | 0.9                                                | 2.7                                                           |

|                                                                  |             |             |               |             |             |               |
|------------------------------------------------------------------|-------------|-------------|---------------|-------------|-------------|---------------|
| <b>Group 5</b> (multiparous women with at least one previous CS) | 281         | 362         | 9.0           | 77.6        | 7.0         | 21.4          |
| <b>Group 5.1</b> (one previous CS)                               | 214         | 290         | 7.2           | 73.8        | 5.3         | 16.3          |
| <b>Group 5.2</b> (two or more previous CS)                       | 57          | 72          | 1.8           | 79.2        | 1.4         | 4.3           |
| <b>Group 6</b> (nulliparous women with singleton breech)         | 38          | 46          | 1.2           | 82.6        | 0.9         | 2.9           |
| <b>Group 7</b> (multiparous women with singleton breech)         | 58          | 65          | 1.6           | 89.2        | 1.4         | 4.4           |
| <b>Group 8</b> (all multiple pregnancies)                        | 91          | 154         | 3.9           | 59.1        | 2.3         | 6.9           |
| <b>Group 9</b> (all women with transverse or oblique lie)        | 16          | 16          | 0.4           | 100.0       | 0.4         | 1.2           |
| <b>Group 10</b> (all women with pre-term delivery)               | 137         | 526         | 13.1          | 26.0        | 3.4         | 10.4          |
| <b>Total</b>                                                     | <b>1314</b> | <b>4004</b> | <b>100.00</b> | <b>32.8</b> | <b>32.8</b> | <b>100.00</b> |

Group size (%) = n of women in the group/total number of women delivered in the hospital × 100.

Group CS rate (%) = n of CS in the group/total number of women in the group × 100.

Absolute contribution (%) = n of CS in the group/total number of women delivered in the hospital × 100.

Relative contribution (%) = n of CS in the group/total number of CS in the hospital × 100.



## Discussion

A high proportion of deliveries in Hawassa University Referral Hospital were CS, almost a third. The major contributors to the overall CS rate were group 1 (nulliparous with singleton pregnancy in spontaneous labour), group 5 (multiparous women with at least one previous CS) and group 3 (multiparous women without previous CS, with singleton pregnancy in spontaneous labour). The most commonly reported indications for CS were a foetal compromise, previous CS and obstructed labour.

In this study we interpreted the findings based on Robson's implementation manual (18): We assessed the quality of the data, the population attending the services (shown in Appendix 1), and we evaluated the proportion of CS in each group (shown in Appendix 2). The evaluation of the CS rates is useful for auditing obstetric services.

Our study had several strengths. To our knowledge, this study is the first study at a major hospital in Ethiopia that assessed the CS rate using Robson's Ten Group Classification System for all labouring mothers. The birth registration was prospective and consecutive; hence the risk of incomplete data was minimized. All women who gave birth in the hospital during the study were included and this may have reduced the risk for selection bias.

The study also had some weaknesses. The study was conducted in a single hospital, and since it is a referral hospital, the selection of participants may be biased to some degree, and for this reason the findings might be less generalizable. However, standardization according to Robson is able to be used in this situation. Its use permits valid and useful comparisons to be done even at different levels of care. Another weakness is that the study used birth weight to determine gestational age for some mothers, and this could lead to a misclassification of some births into a wrong Robson group. We assessed whether this results in misclassification among Robson group according to WHO Robson implementation manual and the risk of misclassification was minimal. A third potential weakness involved inconsistent use of partogram and foetal heartbeat. This makes the criteria for decisions and indications for CS unclear and left much up to individual doctor's discretion.

The manual for interpretation of CS rates recommends that the size of group 9 (women

1  
2  
3 with *transverse lie*, singletons pregnancy), should be less than 1% of the total and the CS  
4 rate should be 100% for this group (18). In our study, the size of group 9 was 0.4% and the  
5 CS rate in this group was 100%, suggesting minimal misclassification in this group, and  
6 the size of group 9 was similar to other studies (18, 22, 23)  
7  
8  
9

10  
11 In our study several indicators were in line with the comparison populations given in  
12 Robson's manual; the proportion of women with *breech* pregnancy (group 6 and 7), the  
13 ratio of the size of group 1 (nulliparous women with singleton pregnancy in *spontaneous*  
14 *labour*) and group 2 (nulliparous women with singleton pregnancy, who had induced  
15 labour or *pre-labour CS*), as well as the ratio of the size of group 3 (multiparous women  
16 without *previous CS*, with singleton pregnancy in *spontaneous labour*) and group 4 (  
17 multiparous women without *previous CS*, with singleton pregnancy, who had induced  
18 labour or *pre-labour CS*) (18, 22, 23). However, the proportion of group 1 (*nulliparous*  
19 women with singleton pregnancy in *spontaneous labour*) and group 2 (*nulliparous* women  
20 with singleton pregnancy, who had induced labour or *pre-labour CS*) was slightly lower  
21 than the comparison populations (18, 22, 23). This may be due to the low proportions of  
22 nulliparous women in our study. The proportion of group 3 (*multiparous* women without  
23 previous CS, with singleton pregnancy in *spontaneous labour*) and group 4 (*multiparous*  
24 women without previous CS, with singleton pregnancy, who had induced labour or *pre-*  
25 *labour CS*) was higher than the Robson reference population (18). This may be explained  
26 by the fact that we had a high proportion of multiparous women in our study populations.  
27 According to Robson, the proportion of group 5 (multiparous women with at least one  
28 *previous CS*) should, be about half of all the CS. In our study, the proportion of group 5  
29 represents less than 10% of the total women delivered in the hospital, which may reflect a  
30 low CS rate in previous years. The proportion of group 8 (women with multiple  
31 pregnancies) and group 10 (women with preterm pregnancy) in our study was similar with  
32 the comparison population (18, 22, 23).  
33  
34  
35  
36  
37  
38  
39  
40  
41  
42  
43  
44  
45  
46  
47  
48  
49

50 The CS rate in Robson group 1 (*nulliparous* women with singleton pregnancy in  
51 *spontaneous labour*) was 27.5%, which is much higher than Robson's recommendation of  
52 under 10% (18). This may reflect a selection among nullipara, where many normal  
53 spontaneous deliveries take place at lower health facilities (health centres and primary  
54  
55  
56  
57  
58  
59  
60

1  
2  
3 hospitals), and those who attend this referral hospital are selected, either referred or they  
4 decided themselves for unknown reasons to attend the hospital. Alternatively, it may  
5 reflect a low “threshold” interpreting criterion for a CS.  
6  
7

8  
9  
10 The CS rate in group 2 (*nulliparous* women with singleton pregnancy, who had labour  
11 induced or *pre-labour CS*) was similar to the comparison populations (22, 23), but higher  
12 than Robson's recommendation (18). This may reflect that the threshold for deciding on  
13 doing CS is too low, and this may happen at extremely busy labour wards; for example,  
14 the ward is so busy that calling a doctor and suggesting a CS in a case of slow progress  
15 may be preferred to a time-consuming trial of labour. This “low” CS threshold may  
16 explain why group 3 (*multiparous* women without previous CS, with singleton pregnancy  
17 in spontaneous labour) also had a higher CS rate (17%) than the comparisons (3-5%) (18,  
18 22, 23). It could also be partly due to some misclassification by including women from  
19 group 5 (*multiparous* women with at least one *previous CS*) in group 3, but this is less  
20 likely.  
21  
22  
23  
24  
25  
26  
27  
28  
29

30 Robson recommends that the CS rate in group 4 (*multiparous* women without a previous CS,  
31 with singleton pregnancy, who had induced labour or *pre-labour CS*) should be less than 15%,  
32 while in our study this rate was much higher (43%). This may be because of the high CS rate in  
33 women who underwent induction of labour (group 4a) (26.8%), which contributed to the high  
34 overall CS rate in group 4. Also, it may partly be due to a high proportion of failed inductions, or  
35 possible misclassifications by including group 5 (*multiparous* women with at least one *previous*  
36 *CS*) in group 4.  
37  
38  
39  
40  
41  
42  
43  
44  
45  
46  
47  
48  
49  
50  
51  
52  
53  
54  
55  
56  
57  
58  
59  
60

1  
2  
3 The CS rate in group 5 (multiparous women with at least one *previous CS*) in our study was  
4 77.6%, which is higher than the Robson reference (50-60%) (18). This indicates that in our  
5 study, too few women were offered a trial of labour after having had previous CS.  
6  
7  
8  
9

10 The CS rate for breech in group 6 (*nulliparous* women with singleton *breech* pregnancy) and  
11 group 7 (*multiparous* women with a singleton *breech* pregnancy including previous CS) in our  
12 study was similar to comparison populations (18, 22, 23).  
13  
14  
15

16  
17 Robson recommends that nullipara and women with a previous CS should make up around 66%  
18 of CS at the hospital, comprising group 1 (*nulliparous* women with singleton pregnancy in  
19 *spontaneous labour*), group 2 (*nulliparas* women with singleton pregnancy, who had induced  
20 labour or *pre-labour CS*) and group 5 (*multiparous* women with at least one *previous CS*) (18). In  
21 our study, the relative contribution of these three groups (1,2,5) to the overall CS rate was 51.7%.  
22 This difference may be that the study area had few nullipara with planned CS, as seen in the low  
23 relative contribution of group 2 (*nulliparas* women with singleton pregnancy, who had induced  
24 labour or *pre-labour CS*) to the overall CS rate which in our study was (7.38%).  
25  
26  
27  
28  
29  
30  
31

32 Our study showed that Robson group 1 (*nulliparous* women with singleton pregnancy in  
33 *spontaneous labour*), group 5 (multiparous women with at least one *previous CS*) and  
34 group 3 (*multiparous* women without previous CS, with singleton pregnancy in  
35 *spontaneous labour*) were the major contributors to the overall CS rate. These same groups  
36 were the major contributors in the eastern Ethiopia and elsewhere (14, 24-29), though the  
37 order was different. The difference in the order of these groups among the studies may  
38 be because of the variation in study populations and overall CS rate (18). The high contribution  
39 of emergency CS in nullipara (group 1, nulliparous women with singleton pregnancy in  
40 *spontaneous labour*) in our study may be related to inappropriate indications of CS delivery  
41 in this group in our study hospital. More than one third (35%) of CS performed in this  
42 group is due to abnormal foetal heartbeat patterns. This was high, indicating the possibility  
43 of misdiagnosis of abnormal foetal heartbeat pattern. A more active use of the partogram  
44 as a tool for decision-making would help clinicians and midwives decide more  
45 consistently, instead of relying on too heavily health care workers individual assessment in  
46  
47  
48  
49  
50  
51  
52  
53  
54  
55  
56  
57  
58  
59  
60

1  
2  
3 a busy ward.  
4  
5

6 The most commonly reported indications for CS were foetal compromise, previous CS and  
7 obstructed labour; similar indications have been reported from eastern Ethiopia (14) and  
8 elsewhere in Africa, Asia and Australia (27, 29-32).  
9  
10

11  
12 In conclusion, this study has shown a high overall CS rate at Hawassa University Referral  
13 Hospital. Nulliparous women with singleton pregnancy in spontaneous labour (group 1),  
14 multiparous women with at least one previous CS (group 5) and multiparous women  
15 without previous CS, with singleton pregnancy, in spontaneous labour (group 3) were the  
16 major contributors to the overall high CS rates. Foetal compromise, previous CS and  
17 obstructed labour were the major indications for performing CS. There was a high CS rate  
18 in low-risk groups (group 1 and 3). We recommend that all labouring women be regularly  
19 followed with partogram, and that they be given the opportunity for instrumental delivery  
20 to decrease the use of primary CS among low risk groups. The reasons for the high CS rate  
21 among low-risk groups should be explored and the appropriateness of CS should be  
22 evaluated to reduce the overall CS rate, which benefits the health system, in general.  
23  
24  
25  
26  
27  
28  
29  
30  
31

### 32 **Author affiliations:**

33  
34  
35  
36 <sup>1</sup> School of Public Health, College of Medicine and Health Sciences, Hawassa University,  
37 Hawassa, Ethiopia.  
38

39  
40 <sup>2</sup> Centre for International Health (CIH), University of Bergen, Bergen, Norway  
41  
42  
43

### 44 **Acknowledgements:**

45 We would like to thank Hawassa University Referral Hospital management and the Head of its  
46 Obstetrics Ward for creating a conducive environment in order to accomplish this research. We  
47 want to extend our thanks to NORHED-SENUPH project for financial support.  
48  
49  
50  
51

### 52 **Author Contributions:**

53  
54 AAA and BL conceived the study and analysed the data. AAA wrote the proposal and the first  
55 draft of the manuscript. SGH, AGT, and BL supervised and provided mentorship. All authors  
56  
57  
58

1  
2  
3 contributed to the writing and reviewed the article and approved the final version of the  
4 manuscript.  
5

6 **Patient consent:** Written consent was obtained from all delivering mothers to participate in this  
7 study. The consent was made according to ethical principles of “autonomy” by including  
8 statements that give participants the right to decline participation in the study at any time. The  
9 consent also included statements of potential risk, benefits and confidentiality.  
10  
11  
12  
13

14  
15 **Ethics approval:** This study was approved by Hawassa University College of Medicine and  
16 Health Sciences Institutional Review Board (ref.no.IRB/007/10), and Regional Ethical  
17 Committee (Rek Vest) (ref.no.2018/595) in Norway.  
18  
19  
20  
21

22 **Funding:** Financial support was obtained from NORHED through the SENUPH (Southern  
23 Ethiopia Network of University in Public Health) project (ETH-13/0025).  
24

25 **Disclaimer:** The funding organisation has no role in the design, execution or decision to publish  
26 the study.  
27  
28

29 **Competing interests:** None declared  
30

31 **Data sharing statement:** Data are available upon reasonable request  
32  
33  
34  
35  
36  
37  
38  
39  
40  
41  
42  
43  
44  
45  
46  
47  
48  
49  
50  
51  
52  
53  
54  
55  
56  
57  
58  
59  
60

## References

1. Biccard BM, Madiba TE, Kluyts HL, Munlemvo DM, Madzimbamuto FD, Basenero A, et al. Perioperative patient outcomes in the African Surgical Outcomes Study: a 7-day prospective observational cohort study. *Lancet (London, England)*. 2018;391(10130):1589-98.
2. WHO Statement on caesarean section rates. *Reprod Health Matters*. 2015;23(45):149-50.
3. Appropriate technology for birth. *Lancet (London, England)*. 1985;2(8452):436-7.
4. Betran AP, Torloni MR, Zhang J, Ye J, Mikolajczyk R, Deneux-Tharaux C, et al. What is the optimal rate of caesarean section at population level? A systematic review of ecologic studies. *Reproductive health*. 2015;12:57.
5. Souza JP, Gulmezoglu A, Lumbiganon P, Laopaiboon M, Carroli G, Fawole B, et al. Caesarean section without medical indications is associated with an increased risk of adverse short-term maternal outcomes: the 2004-2008 WHO Global Survey on Maternal and Perinatal Health. *BMC Med*. 2010;8:71.
6. Villar J, Carroli G, Zavaleta N, Donner A, Wojdyla D, Faundes A, et al. Maternal and neonatal individual risks and benefits associated with caesarean delivery: multicentre prospective study. *BMJ (Clinical research ed)*. 2007;335(7628):1025.
7. Zhang Y, Zhou J, Ma Y, Liu L, Xia Q, Fan D, et al. Mode of delivery and preterm birth in subsequent births: A systematic review and meta-analysis. *PloS one*. 2019;14(3):e0213784.
8. Kok N, Ruiters L, Hof M, Ravelli A, Mol BW, Pajkrt E, et al. Risk of maternal and neonatal complications in subsequent pregnancy after planned caesarean section in a first birth, compared with emergency caesarean section: a nationwide comparative cohort study. *BJOG : an international journal of obstetrics and gynaecology*. 2014;121(2):216-23.
9. Huang X, Lei J, Tan H, Walker M, Zhou J, Wen SW. Cesarean delivery for first pregnancy and neonatal morbidity and mortality in second pregnancy. *European journal of obstetrics, gynecology, and reproductive biology*. 2011;158(2):204-8.
10. Betran AP, Ye J, Moller AB, Zhang J, Gulmezoglu AM, Torloni MR. The Increasing Trend in Caesarean Section Rates: Global, Regional and National Estimates: 1990-2014. *PloS one*. 2016;11(2):e0148343.
11. Boerma T, Ronsmans C, Melesse DY, Barros AJD, Barros FC, Juan L, et al. Global epidemiology of use of and disparities in caesarean sections. *Lancet (London, England)*. 2018;392(10155):1341-8.
12. Central Statistical Agency (CSA) [Ethiopia] and ICF. Ethiopia Demographic and Health Survey 2016. Addis Ababa, Ethiopia, and Rockville, Maryland, USA. Ethiopia Demographic and Health Survey: CSA and ICF, 2016.
13. Fesseha N, Getachew A, Hiluf M, Gebrehiwot Y, Bailey P. A national review of cesarean delivery in Ethiopia. *International journal of gynaecology and obstetrics: the official organ of the International Federation of Gynaecology and Obstetrics*. 2011;115(1):106-11.
14. Tura AK, Pijpers O, de Man M, Cleveringa M, Koopmans I, Gure T, et al. Analysis of caesarean sections using Robson 10-group classification system in a university hospital in eastern Ethiopia: a cross-sectional study. *BMJ open*. 2018;8(4):e020520.
15. Torloni MR, Betran AP, Souza JP, Widmer M, Allen T, Gulmezoglu M, et al. Classifications for caesarean section: a systematic review. *PloS one*. 2011;6(1):e14566.
16. Betran AP, Vindevoghel N, Souza JP, Gulmezoglu AM, Torloni MR. A systematic review of the Robson classification for caesarean section: what works, doesn't work and how to improve it. *PloS one*. 2014;9(6):e97769.

17. Robson M. The Ten Group Classification System (TGCS) - a common starting point for more detailed analysis. *BJOG : an international journal of obstetrics and gynaecology*. 2015;122(5):701.
18. Robson Classification: Implementation Manual. Geneva: World Health Organization; 2017. Licence: CC BY-NC-SA 3.0IGO. .
19. Ethiopian Public Health Institute (EPHI) [Ethiopia] and ICF. 2019. Ethiopia Mini Demographic and Health Survey 2019: Key Indicators. Rockville, Maryland, USA: EPHI and ICF.
20. Per Bergsjø, Joseph Mlay, Olola Oneko, Shao J. Instructions manual for Registration of deliveries at the KCMC Birth Registry, Revised Edition: Department of Obstetrics and Gynecology KCMC Moshi, Tanzania and Department of Public Health and Primary Health Care University of Bergen Bergen, Norway, 2010.
21. Stanton C, Ronsmans C. Recommendations for routine reporting on indications for cesarean delivery in developing countries. *Birth (Berkeley, Calif)*. 2008;35(3):204-11.
22. Senanayake H, Piccoli M, Valente EP, Businelli C, Mohamed R, Fernando R, et al. Implementation of the WHO manual for Robson classification: an example from Sri Lanka using a local database for developing quality improvement recommendations. *BMJ open*. 2019;9(2):e027317.
23. Souza JP, Betran AP, Dumont A, de Mucio B, Gibbs Pickens CM, Deneux-Tharoux C, et al. A global reference for caesarean section rates (C-Model): a multicountry cross-sectional study. *BJOG : an international journal of obstetrics and gynaecology*. 2016;123(3):427-36.
24. Abdel-Aleem H, Shaaban OM, Hassanin AI, Ibraheem AA. Analysis of cesarean delivery at Assiut University Hospital using the Ten Group Classification System. *International journal of gynaecology and obstetrics: the official organ of the International Federation of Gynaecology and Obstetrics*. 2013;123(2):119-23.
25. Costa ML, Cecatti JG, Souza JP, Milanez HM, Gulmezoglu MA. Using a Caesarean Section Classification System based on characteristics of the population as a way of monitoring obstetric practice. *Reproductive health*. 2010;7:13.
26. Litorp H, Kidanto HL, Nystrom L, Darj E, Essen B. Increasing caesarean section rates among low-risk groups: a panel study classifying deliveries according to Robson at a university hospital in Tanzania. *BMC pregnancy and childbirth*. 2013;13:107.
27. Tapia V, Betran AP, Gonzales GF. Caesarean Section in Peru: Analysis of Trends Using the Robson Classification System. *PloS one*. 2016;11(2):e0148138.
28. Yadav RG, Maitra N. Examining Cesarean Delivery Rates Using the Robson's Ten-group Classification. *J Obstet Gynaecol India*. 2016;66(Suppl 1):1-6.
29. Tognon F, Borghero A, Putoto G, Maziku D, Torelli GF, Azzimonti G, et al. Analysis of caesareansection and neonatal outcome using the Robson classification in a rural district hospital in Tanzania: an observational retrospective study. *BMJ open*. 2019;9(12):e033348.
30. Begum T, Nababan H, Rahman A, Islam MR, Adams A, Anwar I. Monitoring caesarean births using the Robson ten group classification system: A cross-sectional survey of private for-profit facilities in urban Bangladesh. *PloS one*. 2019;14(8):e0220693.
31. Makhanya V, Govender L, Moodley J. Utility of the Robson Ten Group Classification System to determine appropriateness of caesarean section at a rural regional hospital in KwaZulu-Natal, South Africa. *SAMJ*. 2015;105(4):292-5.



1  
2  
3  
4  
5  
6  
7  
8  
9  
10  
11  
12  
13  
14  
15  
16  
17  
18  
19  
20  
21  
22  
23  
24  
25  
26  
27  
28  
29  
30  
31  
32  
33  
34  
35  
36  
37  
38  
39  
40  
41  
42  
43  
44  
45  
46  
47  
48  
49  
50  
51  
52  
53  
54  
55  
56  
57  
58  
59  
60

32. Tanaka K, Mahomed K. The Ten-Group Robson Classification: A Single Centre Approach Identifying Strategies to Optimise Caesarean Section Rates. *Obstet Gynecol Int.* 2017;2017:5648938.

For peer review only

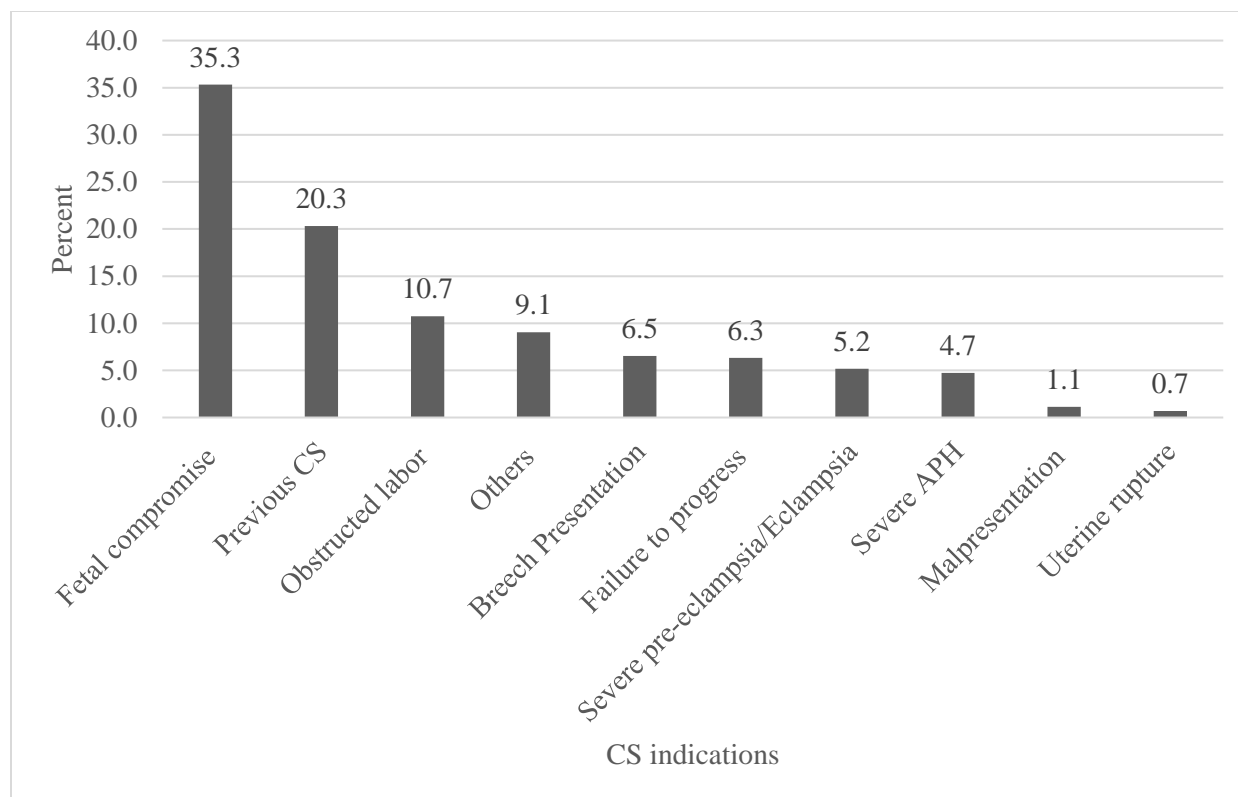

**Figure 1.** Indications for performing caesarean section (CS) among women who gave birth at Hawassa University Referral Hospital, Ethiopia, 2018-2019.

Foetal compromise = Foetal distress, cord prolapse, and intrauterine growth restriction. Failure to progress = Prolonged labour, cervical arrest, and failed induction. Obstructed labour = Cephalopelvic disproportion, macrosomia, and unspecified disproportions. Malpresentation = Transverse, oblique or brow. Others = Post term pregnancy, premature rupture of membrane, multiple pregnancies and polyhydramnios/oligohydramnios. APH, antepartum haemorrhage.

**Appendix 1:** Assessment of the type of Populations among women who gave birth at Hawassa University Referral Hospital, Hawassa, South Ethiopia.

| <b>Steps for Interpretation</b>   | <b>Interpretation by Robson</b> | <b>Example: MCS Population</b> | <b>Sri Lanka study</b> | <b>Our finding</b> | <b>Additional information from the data</b> | <b>Final Interpretation</b>                                                                                                                                                                                                                                                                                       |
|-----------------------------------|---------------------------------|--------------------------------|------------------------|--------------------|---------------------------------------------|-------------------------------------------------------------------------------------------------------------------------------------------------------------------------------------------------------------------------------------------------------------------------------------------------------------------|
| <b>Step 1:</b> Size of group 1+ 2 | 35-42%                          | 38.1%                          | 38.1%                  | 32.99%             | Nulliparas in our population 41.1%          | Rate is lower than all the three references by Robson, MCS and Sri Lanka populations. This might be due to a low proportion of nullipara women in our Hospital. There is also a possibility of misclassification (group 1 misclassified as group 10) since we determined gestational based new-born birth weight. |
| <b>Step 2:</b> Size of Group 3+4  | 30%                             | 46.5%                          | 37.3%                  | 37.81%             | Multiparous in our population 58.9%         | Rate higher than Robson reference population, in line with Sri Lanka reference population and lower than MCS examples. This may be explained by a high proportion of multiparous women in our population                                                                                                          |
| <b>Step 3:</b> Size of group 5    | Half of the total CS rate       | 7.2%                           | 10.9%                  | 9.04%              | -                                           | Lower than half of total CS. This, as suggested by the WHO manual, may be due to relatively low CS rate in the previous years, or to a recently increased CS rate or misclassification.                                                                                                                           |
| <b>Step 4:</b> size of group 6+7  | 3-4%                            | 2.7%                           | 3.4%                   | 2.77%              | -                                           | Rate is in line with Robson, MCS and Sri Lanka reference populations                                                                                                                                                                                                                                              |
| <b>Step 5:</b> Size of group 8    | 1.5-2%                          | 0.9%                           | 1.1%                   | 3.85%              | 36.7% of women delivered in our Hospitals   | Rate is higher than Robson, MCS and Sri Lanka reference populations. This may be due to high referral cases in our hospital as suggested by the WHO manual.                                                                                                                                                       |

|                                                            |                   |           |           |           |                                                                            |                                                                                                                                                                                                                                                                                                                                                    |
|------------------------------------------------------------|-------------------|-----------|-----------|-----------|----------------------------------------------------------------------------|----------------------------------------------------------------------------------------------------------------------------------------------------------------------------------------------------------------------------------------------------------------------------------------------------------------------------------------------------|
|                                                            |                   |           |           |           | 15.1% of all women who gave birth in our hospital delivered preterm birth. | Rate is higher than Robson, MCS and Sri Lanka reference populations. This may be due to high referral cases and high preterm birth in our hospital. The hospital is a tertiary hospital were most high-risk pregnancies referred to. There is also a possibility of misclassification since we determined gestational based new-born birth weight. |
| <b>Step 6:</b> Size of group 10                            | <10%              | 4.2%      | 7.8%      | 13.14%    | 15.1% of all women who gave birth in our hospital delivered preterm birth. | Rate is higher than Robson, MCS and Sri Lanka reference populations. This may be due to high referral cases and high preterm birth in our hospital. The hospital is a tertiary hospital were most high-risk pregnancies referred to. There is also a possibility of misclassification since we determined gestational based new-born birth weight. |
| <b>Step 7:</b> Ratio of the size of group 1 versus group 2 | Ratio 2 or higher | Ratio 3.3 | Ratio 1.5 | Ratio 4.8 | -                                                                          | The rate in line with Robson and MCS example reference populations                                                                                                                                                                                                                                                                                 |
| <b>Step 8:</b> Ratio of size of group 3 versus group 4     | >2:1              | Ratio 6.3 | Ratio 2.6 | Ratio 8.6 | -                                                                          | Rate in line with Robson and MCS example reference populations                                                                                                                                                                                                                                                                                     |
| <b>Step 9:</b> Ratio of size of group 6 versus group 7     | Usually 2:1       | Ratio 0.8 | Ratio 1.2 | Ratio 0.7 | Multiparous in our population 58.9%                                        | The rate in line with MCS and Sri Lanka reference populations, but lower than Robson references. This may be explained by a high proportion of Multiparous women in our population.                                                                                                                                                                |

1  
2  
3  
4  
5  
6  
7  
8  
9  
10  
11  
12  
13  
14  
15  
16  
17  
18  
19  
20  
21  
22  
23  
24  
25  
26  
27  
28  
29  
30  
31  
32  
33  
34  
35  
36  
37  
38  
39  
40  
41  
42  
43  
44  
45  
46  
47

**Appendix 2:** Assessment of CS Rates among women who gave birth at Hawassa University Referral Hospital, Hawassa, South Ethiopia.

| <b>Steps for Interpretation</b>    | <b>Interpretation by Robson</b>     | <b>Example: MCS Population</b> | <b>Sri Lanka study</b> | <b>Our finding</b> | <b>Additional information from the data</b>                                      | <b>Final Interpretation</b>                                                                                                                                                                                                                                                                     |
|------------------------------------|-------------------------------------|--------------------------------|------------------------|--------------------|----------------------------------------------------------------------------------|-------------------------------------------------------------------------------------------------------------------------------------------------------------------------------------------------------------------------------------------------------------------------------------------------|
| <b>Step 1:</b> CS rate in group 1  | Under 10% are achievable            | 9.8%                           | 18.8%                  | 27.5%              | 35.0% of CS delivery is due to Abnormal foetal heartbeat pattern in our hospital | CS rate is higher than Robson, MCS, and Sri Lanka. This might due to a high ratio of group 1 to group 2 population in our study which indicates a higher CS rate in these groups as suggested by the WHO manual. It might also due to inappropriate indications of CS delivery in our hospital. |
| <b>Step 2:</b> CS rate in group 2  | Consistently around 20%–35%         | 39.8%                          | 41.0%                  | 42.7%              | - Failed induction was an indication in 36.0% of group 2a.                       | CS rate in line with Sri Lanka, but higher than MCS and Robson references. This may be possibly due to inappropriate indications of CS in the induction of labour and pre-labour CS.                                                                                                            |
| <b>Step 3:</b> CS rate in Group 3  | Not higher than 3.0%.               | 3.0%                           | 5.2%                   | 16.7%              | -Obstructed labour was an indication in 51.5%.                                   | CS rate is higher than Robson, MCS, and Sri Lanka. This may be explained by misclassification (group 5 misclassified as group 3).                                                                                                                                                               |
| <b>Step 4:</b> CS rate for group 4 | It rarely should be higher than 15% | 23.7%                          | 16.8%                  | 43.04%             | Failed induction was an indication in 24.0% of group 4a.                         | CS rate is higher than Robson, MCS, and Sri Lanka. There was a high CS rate in group 4a (26.8%) which contributed to the high CS rate in group 4 in our study. The possible explanation may high failed induction or there might be misclassifications (group 5 misclassified as group 4).      |

|                                                                                  |                                                                        |                                 |                               |                               |                                                                              |                                                                                                                                                                                                                                                                  |
|----------------------------------------------------------------------------------|------------------------------------------------------------------------|---------------------------------|-------------------------------|-------------------------------|------------------------------------------------------------------------------|------------------------------------------------------------------------------------------------------------------------------------------------------------------------------------------------------------------------------------------------------------------|
| <b>Step 5:</b> CS rate in group 5                                                | Rates of 50%– 60% are considered appropriate                           | 74.4%                           | 81.8%                         | 77.6%                         | Previous CS was the indication in 72.8%. Rate of prelabour CS was 33.9%      | CS rate is higher than Robson and MCS examples but lower than the Sri Lanka study. This may be due to a high indication of CS due to previous CS, low offer of a trial of labour or VBAC (Vaginal birth after CS delivery), women's preference for repeating CS. |
| <b>Step 6:</b> CS rate for group 8                                               | Usually around 60%                                                     | 57.7%                           | 80.9%                         | 59.1%                         | -                                                                            | CS rate in line with Robson and MCS example.                                                                                                                                                                                                                     |
| <b>Step 7:</b> CS rate in group 10                                               | Usually around 30%                                                     | 25.1%                           | 41.1%                         | 26.05%                        | -                                                                            | CS rate in line with Robson and MCS example                                                                                                                                                                                                                      |
| <b>Step 8:</b> Relative contribution of groups 1, 2 and 5 to the overall CS rate | Normally contribute to 2/3 (66%) of all CS performed in most hospitals | Contributed to 63.7% of all CS  | 63.9%                         | 51.7%                         | The relative contribution of group 2 to the overall CS rate was low (7.38%). | CS rate lower than Robson, MCS example and Sri Lanka study. This may be due to the relative contribution of group 2 to the overall CS rate which was low. The size of group 2 may also be contributed due to the misclassification of the pre-term as a term.    |
| <b>Step 9:</b> Absolute contribution of group 5 to overall CS rate               | NA                                                                     | Responsible for 28.9% of all CS | Absolute contribution: 8.87%  | Absolute contribution: 7.02%  | -                                                                            | The absolute contribution was not indicated in the WHO Robson manual, but our study finding was lower than the MCS example and Sri Lanka study.                                                                                                                  |
|                                                                                  |                                                                        |                                 | Relative contribution: 29.59% | Relative contribution: 21.39% |                                                                              |                                                                                                                                                                                                                                                                  |

# STROBE\_ Cross sectional Check list

|                           | Reporting Item                                                                                                                                              | Page Number |
|---------------------------|-------------------------------------------------------------------------------------------------------------------------------------------------------------|-------------|
| <b>Title and abstract</b> |                                                                                                                                                             |             |
| Title                     | <a href="#">#1a</a> Indicate the study's design with a commonly used term in the title or the abstract                                                      | 1           |
| Abstract                  | <a href="#">#1b</a> Provide in the abstract an informative and balanced summary of what was done and what was found                                         | 1           |
| <b>Introduction</b>       |                                                                                                                                                             |             |
| Background / rationale    | <a href="#">#2</a> Explain the scientific background and rationale for the investigation being reported                                                     | 3           |
| Objectives                | <a href="#">#3</a> State specific objectives, including any prespecified hypotheses                                                                         | 4           |
| <b>Methods</b>            |                                                                                                                                                             |             |
| Study design              | <a href="#">#4</a> Present key elements of study design early in the paper                                                                                  | 4           |
| Setting                   | <a href="#">#5</a> Describe the setting, locations, and relevant dates, including periods of recruitment, exposure, follow-up, and data collection          | 4           |
| Eligibility criteria      | <a href="#">#6a</a> Give the eligibility criteria, and the sources and methods of selection of participants.                                                | 4           |
|                           | <a href="#">#7</a> Clearly define all outcomes, exposures, predictors, potential confounders, and effect modifiers. Give diagnostic criteria, if applicable | 5           |

|    |                |                      |                                                        |                             |
|----|----------------|----------------------|--------------------------------------------------------|-----------------------------|
| 1  | Data sources / | <a href="#">#8</a>   | For each variable of interest give sources of data and | 5,6                         |
| 2  | measurement    |                      | details of methods of assessment (measurement).        |                             |
| 3  |                |                      | Describe comparability of assessment methods if        |                             |
| 4  |                |                      | there is more than one group. Give information         |                             |
| 5  |                |                      | separately for for exposed and unexposed groups if     |                             |
| 6  |                |                      | applicable.                                            |                             |
| 7  |                |                      |                                                        |                             |
| 8  |                |                      |                                                        |                             |
| 9  |                |                      |                                                        |                             |
| 10 |                |                      |                                                        |                             |
| 11 |                |                      |                                                        |                             |
| 12 | Bias           | <a href="#">#9</a>   | Describe any efforts to address potential sources of   | 6                           |
| 13 |                |                      | bias                                                   |                             |
| 14 |                |                      |                                                        |                             |
| 15 |                |                      |                                                        |                             |
| 16 | Study size     | <a href="#">#10</a>  | Explain how the study size was arrived at              | N/A, we have included all   |
| 17 |                |                      |                                                        | laboring mothers during the |
| 18 |                |                      |                                                        | study period.               |
| 19 |                |                      |                                                        |                             |
| 20 |                |                      |                                                        |                             |
| 21 |                |                      |                                                        |                             |
| 22 | Quantitative   | <a href="#">#11</a>  | Explain how quantitative variables were handled in     | 5                           |
| 23 | variables      |                      | the analyses. If applicable, describe which groupings  |                             |
| 24 |                |                      | were chosen, and why                                   |                             |
| 25 |                |                      |                                                        |                             |
| 26 |                |                      |                                                        |                             |
| 27 |                |                      |                                                        |                             |
| 28 | Statistical    | <a href="#">#12a</a> | Describe all statistical methods, including those used | 6,7                         |
| 29 | methods        |                      | to control for confounding                             |                             |
| 30 |                |                      |                                                        |                             |
| 31 |                |                      |                                                        |                             |
| 32 | Statistical    | <a href="#">#12b</a> | Describe any methods used to examine subgroups         | N/A, our study was purely   |
| 33 | methods        |                      | and interactions                                       | descriptive                 |
| 34 |                |                      |                                                        |                             |
| 35 |                |                      |                                                        |                             |
| 36 |                |                      |                                                        |                             |
| 37 | Statistical    | <a href="#">#12c</a> | Explain how missing data were addressed                | 7                           |
| 38 | methods        |                      |                                                        |                             |
| 39 |                |                      |                                                        |                             |
| 40 |                |                      |                                                        |                             |
| 41 | Statistical    | <a href="#">#12d</a> | If applicable, describe analytical methods taking      | N/A, our study design       |
| 42 | methods        |                      | account of sampling strategy                           | descriptive and no sampling |
| 43 |                |                      |                                                        | strategy used               |
| 44 |                |                      |                                                        |                             |
| 45 |                |                      |                                                        |                             |
| 46 |                |                      |                                                        |                             |
| 47 | Statistical    | <a href="#">#12e</a> | Describe any sensitivity analyses                      | N/A, we used WHO Robson     |
| 48 | methods        |                      |                                                        | implementation manual to    |
| 49 |                |                      |                                                        | assess misclassification    |
| 50 |                |                      |                                                        | among Robson's group        |
| 51 |                |                      |                                                        |                             |
| 52 |                |                      |                                                        |                             |
| 53 |                |                      |                                                        |                             |
| 54 |                |                      |                                                        |                             |

## Results

|    |              |                      |                                                |   |
|----|--------------|----------------------|------------------------------------------------|---|
| 55 | Participants | <a href="#">#13a</a> | Report numbers of individuals at each stage of | 8 |
|----|--------------|----------------------|------------------------------------------------|---|



study—eg numbers potentially eligible, examined for eligibility, confirmed eligible, included in the study, completing follow-up, and analysed. Give information separately for exposed and unexposed groups if applicable.

|    |                  |                                                                                                                                                                                                                                        |                                |
|----|------------------|----------------------------------------------------------------------------------------------------------------------------------------------------------------------------------------------------------------------------------------|--------------------------------|
| 1  |                  |                                                                                                                                                                                                                                        |                                |
| 2  |                  |                                                                                                                                                                                                                                        |                                |
| 3  |                  |                                                                                                                                                                                                                                        |                                |
| 4  |                  |                                                                                                                                                                                                                                        |                                |
| 5  |                  |                                                                                                                                                                                                                                        |                                |
| 6  |                  |                                                                                                                                                                                                                                        |                                |
| 7  |                  |                                                                                                                                                                                                                                        |                                |
| 8  |                  |                                                                                                                                                                                                                                        |                                |
| 9  |                  |                                                                                                                                                                                                                                        |                                |
| 10 | Participants     | <a href="#">#13b</a> Give reasons for non-participation at each stage                                                                                                                                                                  | 8                              |
| 11 |                  |                                                                                                                                                                                                                                        |                                |
| 12 | Participants     | <a href="#">#13c</a> Consider use of a flow diagram                                                                                                                                                                                    | 8, we used text description    |
| 13 |                  |                                                                                                                                                                                                                                        | instead of flow diagram        |
| 14 |                  |                                                                                                                                                                                                                                        |                                |
| 15 |                  |                                                                                                                                                                                                                                        |                                |
| 16 | Descriptive data | <a href="#">#14a</a> Give characteristics of study participants (eg demographic, clinical, social) and information on exposures and potential confounders. Give information separately for exposed and unexposed groups if applicable. | 8,9                            |
| 17 |                  |                                                                                                                                                                                                                                        |                                |
| 18 |                  |                                                                                                                                                                                                                                        |                                |
| 19 |                  |                                                                                                                                                                                                                                        |                                |
| 20 |                  |                                                                                                                                                                                                                                        |                                |
| 21 |                  |                                                                                                                                                                                                                                        |                                |
| 22 |                  |                                                                                                                                                                                                                                        |                                |
| 23 |                  |                                                                                                                                                                                                                                        |                                |
| 24 |                  |                                                                                                                                                                                                                                        |                                |
| 25 |                  |                                                                                                                                                                                                                                        |                                |
| 26 | Descriptive data | <a href="#">#14b</a> Indicate number of participants with missing data for each variable of interest                                                                                                                                   | 9, 10                          |
| 27 |                  |                                                                                                                                                                                                                                        |                                |
| 28 |                  |                                                                                                                                                                                                                                        |                                |
| 29 |                  |                                                                                                                                                                                                                                        |                                |
| 30 | Outcome data     | <a href="#">#15</a> Report numbers of outcome events or summary measures. Give information separately for exposed and unexposed groups if applicable.                                                                                  | 9, 10, 11                      |
| 31 |                  |                                                                                                                                                                                                                                        |                                |
| 32 |                  |                                                                                                                                                                                                                                        |                                |
| 33 |                  |                                                                                                                                                                                                                                        |                                |
| 34 |                  |                                                                                                                                                                                                                                        |                                |
| 35 |                  |                                                                                                                                                                                                                                        |                                |
| 36 | Main results     | <a href="#">#16a</a> Give unadjusted estimates and, if applicable, confounder-adjusted estimates and their precision (eg, 95% confidence interval). Make clear which confounders were adjusted for and why they were included          | N/A, our study was descriptive |
| 37 |                  |                                                                                                                                                                                                                                        |                                |
| 38 |                  |                                                                                                                                                                                                                                        |                                |
| 39 |                  |                                                                                                                                                                                                                                        |                                |
| 40 |                  |                                                                                                                                                                                                                                        |                                |
| 41 |                  |                                                                                                                                                                                                                                        |                                |
| 42 |                  |                                                                                                                                                                                                                                        |                                |
| 43 |                  |                                                                                                                                                                                                                                        |                                |
| 44 |                  |                                                                                                                                                                                                                                        |                                |
| 45 | Main results     | <a href="#">#16b</a> Report category boundaries when continuous variables were categorized                                                                                                                                             | 9,10,11                        |
| 46 |                  |                                                                                                                                                                                                                                        |                                |
| 47 |                  |                                                                                                                                                                                                                                        |                                |
| 48 |                  |                                                                                                                                                                                                                                        |                                |
| 49 |                  |                                                                                                                                                                                                                                        |                                |
| 50 | Main results     | <a href="#">#16c</a> If relevant, consider translating estimates of relative risk into absolute risk for a meaningful time period                                                                                                      | N/A, our study was descriptive |
| 51 |                  |                                                                                                                                                                                                                                        |                                |
| 52 |                  |                                                                                                                                                                                                                                        |                                |
| 53 |                  |                                                                                                                                                                                                                                        |                                |
| 54 | Other analyses   | <a href="#">#17</a> Report other analyses done—e.g., analyses of subgroups and interactions, and sensitivity analyses                                                                                                                  | N/A, our study was descriptive |
| 55 |                  |                                                                                                                                                                                                                                        |                                |
| 56 |                  |                                                                                                                                                                                                                                        |                                |
| 57 |                  |                                                                                                                                                                                                                                        |                                |
| 58 |                  |                                                                                                                                                                                                                                        |                                |
| 59 |                  |                                                                                                                                                                                                                                        |                                |
| 60 |                  |                                                                                                                                                                                                                                        |                                |

1 **Discussion**

2

3

4 Key results [#18](#) Summarise key results with reference to study 14

5 objectives

6

7

8 Limitations [#19](#) Discuss limitations of the study, taking into account 14

9 sources of potential bias or imprecision. Discuss

10 both direction and magnitude of any potential bias.

11

12

13

14 Interpretation [#20](#) Give a cautious overall interpretation considering 14-18

15 objectives, limitations, multiplicity of analyses,

16 results from similar studies, and other relevant

17 evidence.

18

19

20

21 Generalisability [#21](#) Discuss the generalisability (external validity) of the 14

22 study results

23

24

25 **Other**

26 **Information**

27

28

29

30 Funding [#22](#) Give the source of funding and the role of the 19

31 funders for the present study and, if applicable, for

32 the original study on which the present article is

33 based

34

35

36

37

38

39

40

41

42

43

44

45

46

47

48

49

50

51

52

53

54

55

56

57

58

59

60

# BMJ Open

## Caesarean section rates analysed using Robson's Ten Group Classification System: A cross-sectional study at a tertiary hospital in Ethiopia

|                                 |                                                                                                                                                                                                                                                                                                                                                                                    |
|---------------------------------|------------------------------------------------------------------------------------------------------------------------------------------------------------------------------------------------------------------------------------------------------------------------------------------------------------------------------------------------------------------------------------|
| Journal:                        | <i>BMJ Open</i>                                                                                                                                                                                                                                                                                                                                                                    |
| Manuscript ID                   | bmjopen-2020-039098.R1                                                                                                                                                                                                                                                                                                                                                             |
| Article Type:                   | Original research                                                                                                                                                                                                                                                                                                                                                                  |
| Date Submitted by the Author:   | 04-Aug-2020                                                                                                                                                                                                                                                                                                                                                                        |
| Complete List of Authors:       | Abdo, Abdella; Hawassa University College of Medicine and Health Sciences, Epidemiology<br>Hinderaker , Sven ; University of Bergen Centre for International Health, Center for International Health<br>Tekle, Achamyelesh; Hawassa University College of Medicine and Health Sciences, Public Health<br>Lindtjørn , Bernt ; University of Bergen, Centre for International Health |
| <b>Primary Subject Heading</b>: | Obstetrics and gynaecology                                                                                                                                                                                                                                                                                                                                                         |
| Secondary Subject Heading:      | Public health                                                                                                                                                                                                                                                                                                                                                                      |
| Keywords:                       | PUBLIC HEALTH, Fetal medicine < OBSTETRICS, Maternal medicine < OBSTETRICS, Prenatal diagnosis < OBSTETRICS                                                                                                                                                                                                                                                                        |
|                                 |                                                                                                                                                                                                                                                                                                                                                                                    |

SCHOLARONE™  
Manuscripts

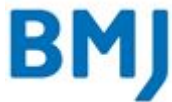

I, the Submitting Author has the right to grant and does grant on behalf of all authors of the Work (as defined in the below author licence), an exclusive licence and/or a non-exclusive licence for contributions from authors who are: i) UK Crown employees; ii) where BMJ has agreed a CC-BY licence shall apply, and/or iii) in accordance with the terms applicable for US Federal Government officers or employees acting as part of their official duties; on a worldwide, perpetual, irrevocable, royalty-free basis to BMJ Publishing Group Ltd ("BMJ") its licensees and where the relevant Journal is co-owned by BMJ to the co-owners of the Journal, to publish the Work in this journal and any other BMJ products and to exploit all rights, as set out in our [licence](#).

The Submitting Author accepts and understands that any supply made under these terms is made by BMJ to the Submitting Author unless you are acting as an employee on behalf of your employer or a postgraduate student of an affiliated institution which is paying any applicable article publishing charge ("APC") for Open Access articles. Where the Submitting Author wishes to make the Work available on an Open Access basis (and intends to pay the relevant APC), the terms of reuse of such Open Access shall be governed by a Creative Commons licence – details of these licences and which [Creative Commons](#) licence will apply to this Work are set out in our licence referred to above.

Other than as permitted in any relevant BMJ Author's Self Archiving Policies, I confirm this Work has not been accepted for publication elsewhere, is not being considered for publication elsewhere and does not duplicate material already published. I confirm all authors consent to publication of this Work and authorise the granting of this licence.

1  
2  
3  
4 **Caesarean section rates analysed using Robson's Ten Group Classification System: A**  
5 **cross-sectional study at a tertiary hospital in Ethiopia**

6 *Abdella Amano Abdo (AAA)*<sup>1,2</sup>, *Sven Gudmund Hinderaker (SGH)*<sup>2</sup>, *Achameyelesh Gebretsedik*  
7 *Tekle (AGT)*<sup>1</sup>, *Bernt Lindtjørn (BL)*<sup>1,2</sup>  
8  
9  
10  
11

12 E-mail address of the authors:

13  
14 AAA: [a2ay.oro@gmail.com](mailto:a2ay.oro@gmail.com), Correspondent author

15  
16 SGH: [Sven.Hinderaker@uib.no](mailto:Sven.Hinderaker@uib.no)

17  
18 AGT: [achameyelesh9@yahoo.com](mailto:achameyelesh9@yahoo.com)

19  
20 BL: [bernt.lindtjorn@uib.no](mailto:bernt.lindtjorn@uib.no)  
21  
22

23 **Abstract**

24 **Objective:** The aim of this study was to assess the Caesarean section (CS) rates using Robson's  
25 Ten-Group Classification System among women who gave birth at Hawassa University Referral  
26 Hospital in Southern Ethiopia.  
27

28  
29 **Design:** Cross-sectional study design to determine CS rate using Robson's Ten-group  
30 classification system.  
31

32  
33 **Setting:** Hawassa University Referral Hospital in South Ethiopia.

34  
35 **Participants:** 4004 women who gave birth in Hawassa University Referral Hospital from June  
36 2018 to June 2019.  
37

38  
39 **Results:** The 4004 women gave birth to 4165 babies. The overall CS rate was 32.8% (95% CI:  
40 31.4%, 34.3%). The major contributors to the overall CS rates were: Robson Group 1  
41 (nulliparous women with singleton pregnancy at term in spontaneous labour) 22.9%; Group 5  
42 (multiparous women with at least one previous CS) 21.4%, and Group 3 (multiparous women  
43 without previous CS, with singleton pregnancy in spontaneous labour) 17.3%. The most  
44 commonly reported indications for CS were "foetal compromise" (35.3%) followed by previous  
45 CS (20.3%) and obstructed labour (10.7%).  
46  
47

48  
49 **Conclusion:** A high proportion of women giving birth at this hospital were given a CS, and  
50 many of them were in a low risk group. Few had trial of labour. More active use of partogram,  
51 improving foetal heartbeat monitoring system and auditing the appropriateness of CS indications  
52 may help to reduce the CS rate.  
53  
54  
55  
56  
57  
58  
59  
60

## Strengths and limitations of this study

- It was the first study in Ethiopia that assesses the CS rate using Robson ten group classification system for all labouring mothers in a hospital.
- The study used prospective birth registration, hence the risk of incomplete data minimized
- All women who gave birth in study hospital were included, reducing the risk for selection bias
- Since the study was conducted in single-hospital with high referral and most complicated cases, the finding might be less generalizable.
- The study used birth weight for gestational age determination for some mothers and the possibility of misclassification among the Robson group cannot be ruled out.

## Introduction

Caesarean section (CS) is a life-saving intervention for both the woman and new-born if a complication occurs during late pregnancy and childbirth. It is the most common surgical intervention in many countries (1). The proportion of women giving birth by CS is used by the World Health Organization as an indicator of the provision of lifesaving services for both mothers and newborns (2). WHO suggest that in normal populations CS rates should not exceed 10-15 % (3). However, there is a growing concern about the increasing percentage of CS globally. The CS rates above 15% are not associated with improved maternal and neonatal health (4), and reasons for a CS may be other than medical; in some countries, for example, it may be a cost free option for expecting mothers (5, 6).

CS performed for women who do not need it can have negative consequences for the mothers as well as their babies, especially when the procedure is done in the absence of adequate facilities, skills and comprehensive care (7). Though CS is effective in reducing maternal and neonatal mortality and morbidity, the procedure is also associated with increased maternal risk of infection, bleeding, blood transfusion, hysterectomy, and death compared to normal delivery (8). Indeed, even small operations carry some risks and must be compared with the risks of not undertaking the procedure. A woman who undergoes a CS will have a slightly increased risk for her subsequent babies to have foetal distress, preterm birth, and stillbirth (9-11).

In 2016, globally, the population-based CS rate varied from 6% to 27.2% (12), and the global rate of CS births had doubled over the last 15 years (13). In Ethiopia, the national population-based CS rate had been the lowest in the world (12), (14), but a national review conducted in 2011 covering 797 facilities indicated a CS rate of 15% in public facilities and 46.1% in privately owned facilities (15). The CS rate at a University hospital in eastern Ethiopia was 25.7% (16). Many of these facility-based CS rates represent a selected population of women, and hence not necessarily representing the CS rate in the population.

Though there is no consensus in defining the optimal CS rate at any level due to lack of reliable and internationally accepted classification system, the Ten-Group Classification System created by Robson has now been accepted and used in many countries (17, 18). This system helps

1 institution-specific monitoring and auditing and offers a standardized comparison method for use  
2 between institutions, countries, and time points (19).

3  
4 WHO has been recommending using this system to assess, monitor and compare CS rates since  
5 2015 (2), but it is not yet implemented in Ethiopia. A study on CS was conducted using  
6 Robson's classification system at a university hospital in eastern Ethiopia (16) but was limited to  
7 women who underwent CS, and was not done according to the Robson implementation manual  
8 (20). Therefore, the aim of our study was to determine CS rate using Ten-Group Classification  
9 System among all the women who gave birth at Hawassa University Referral Hospital in  
10 Southern Ethiopia in 2018/2019.  
11  
12  
13  
14  
15  
16  
17  
18

## 19 **Materials and Methods:**

### 20 **Study setting:**

21  
22 The study was conducted at Hawassa University Referral Hospital, which is 275 km to the south  
23 of Addis Ababa, the capital city of Ethiopia. The hospital provides health care services as both  
24 primary health care for Hawassa city and its nearby districts, and as tertiary care services for the  
25 region Southern Nation Nationalities and Peoples, including some neighbouring regions.  
26 Although it provides tertiary care for a population of 15 million, over 90% of the mothers came  
27 from two towns (Shashamane and Hawassa). According to 2019 Ethiopian Mini Demographic  
28 and Health Survey report, 69.4%, 47.6% and 32% of the women had at least one antenatal care  
29 (ANC) follow up, health facility delivery and postnatal care follow up, respectively, in Southern  
30 Nation Nationalities and Peoples region (21). All pregnant women are encouraged to have a  
31 minimum of 4 ANC visit and to deliver at health facilities. Preventive services such as screening  
32 for HIV/AIDS, Syphilis, tetanus toxoid vaccination and iron folate supplementation are routinely  
33 given for pregnant mothers during their ANC follow up. All services related to delivery,  
34 including CS are expected to be given free of charge for delivering mothers at the Hospital. But  
35 sometimes the women are requested to buy drugs, intravenous fluids or gloves, when unavailable  
36 in the hospital dispensary. No payment (in addition to ordinary salary) is given to the obstetrician  
37 for performing CS. Hawassa University Referral Hospital is providing both basic and  
38 comprehensive management of maternal, new-born and child health services for more than 4500  
39 births annually. The hospital is also serving as teaching hospital for health science and medical  
40 students including residency programs. The Department of Obstetrics and Gynaecology had 6  
41 obstetricians and gynaecologists, 80 midwives, as well as its own operation theatre for obstetrics  
42  
43  
44  
45  
46  
47  
48  
49  
50  
51  
52  
53  
54  
55  
56  
57  
58  
59  
60



1 cases. According to national guidelines for staffing, the recommended number of obstetrician  
2 for specialized hospital is 13 and the number at this hospital is less than recommended (22).  
3  
4  
5

## 6 **Study Design and participants**

7  
8 The design was cross-sectional and included all women who gave birth at the hospital between  
9 June 2018 and June 2019. A medical birth registry was adapted from the Kilimanjaro Christian  
10 Medical Centre in Tanzania (23) and used to collect the data.  
11  
12  
13  
14

## 15 **Variables**

16 The main outcome variable was the rate of CS, in all deliveries. Other variables were as follows:  
17 socio-demographic characteristics (maternal age, residence, educational status, occupational  
18 status), maternal characteristics (history of CS and parity), and pregnancy-related information  
19 (gestational age, foetal presentation, number of fetuses and onset of labour). For those women  
20 who underwent CS, information about the indications of CS was also collected.  
21  
22  
23  
24  
25  
26

27 The CS rates were categorised by the Robson classification system shown in Box 1 (20) using  
28 six obstetric parameters: 1) *Foetal lie and presentations* were classified as cephalic, breech or  
29 transverse/oblique. Gestational age was categorised as a term ( $\geq 37$  weeks) or preterm ( $< 37$   
30 weeks). 2) *Gestational age* assessment should ideally be done by early ultrasound. But in our  
31 study, since most of the women did not have early ultrasound measurement, we used the date of  
32 last menstrual period and third trimester ultrasound to assess gestational age. In the case of no  
33 third trimester ultrasound or unknown last menstrual period, a combination of physical  
34 examination, and estimated foetal weight were used for estimation of gestational age. For cases  
35 with undocumented gestational age, we used a birth weight of  $\geq 2500$  grams as a proxy to term  
36 pregnancy. 3) The *onset of labour* was categorised as spontaneous, induced or CS before labour.  
37 4) *Parity* was classified as nulliparous or multiparous. 5) The *number of fetuses* was categorised  
38 as singleton or multiples. 6) History of previous CS was categorised as one, and two or more.  
39  
40  
41  
42  
43  
44  
45  
46  
47

48 Foetal compromise was defined as a foetus having one of the following conditions: foetal  
49 distress, cord prolapse or intra-uterine growth restriction (IUGR). The hospital has one  
50 Cardiotocography (CTG) that was not used. Ultrasound was occasionally used, but in most of the  
51 cases the foetal heartbeat was monitored using fetoscope. We categorised the need for CS as  
52 “Absolute indication” and “Not absolute indication” (24).  
53  
54  
55  
56  
57  
58  
59  
60

**Box 1: Robson's 10-group classification**

| <b>Group</b> | <b>Description</b>                                                                                                             |
|--------------|--------------------------------------------------------------------------------------------------------------------------------|
| 1            | Nulliparous, singleton, cephalic, $\geq 37$ weeks' gestation, in spontaneous labour                                            |
| 2            | Nulliparous, singleton, cephalic, $\geq 37$ weeks' gestation, induced labour or CS before labour                               |
| 2a           | Labour induced                                                                                                                 |
| 2b           | Prelabour CS                                                                                                                   |
| 3            | Multiparous (excluding previous CS), singleton, cephalic, $\geq 37$ weeks' gestation, in spontaneous labour                    |
| 4            | Multiparous without a previous CS, with singleton, cephalic pregnancy, $\geq 37$ weeks' gestation, induced or CS before labour |
| 4a           | Labour induced                                                                                                                 |
| 4b           | Prelabour CS                                                                                                                   |
| 5            | Previous CS, singleton, cephalic, $\geq 37$ weeks' gestation                                                                   |
| 5.1          | With one previous CS                                                                                                           |
| 5.2          | With two or more previous CSs                                                                                                  |
| 6            | All nulliparous with a single breech                                                                                           |
| 7            | All multiparous with a single breech (including previous CS)                                                                   |
| 8            | All multiple pregnancies (including previous CS)                                                                               |
| 9            | All women with a single pregnancy in a transverse or oblique lie (including those with previous CS)                            |
| 10           | All singleton, cephalic, $< 37$ weeks' gestation pregnancies (including CS).                                                   |

Source: WHO. Robson classification. Geneva: WHO, 2017.

**Data collection**

Data were recorded by three midwives in the maternity ward. Data collectors and supervisors were trained and supervised by the Principal Investigator. Information about the socio-demographic characteristics of delivering mothers were collected through interviews at the time of admission if the women were stable or before discharge from the hospital. Information about CS was retrieved from the operation theatre register and double-checked with the midwives' delivery logbook and the admission and discharge registers. Completeness of data were checked by the Principal Investigator.

**Data processing and analysis**

All registered data were double entered using EpiData Version 3.1 (EpiData Association, Odense, Denmark) and consistency were checked and any necessary corrections were made before data analysis. Data were analysed using SPSS Version 25 (IBM, Chicago, IL).

1 Descriptive statistics with frequencies and percentages for categorical data, as well as means and  
2 standard deviation for numerical data were used to summarize the data. The WHO Robson  
3 implementation manual was used to interpret the results of this study (20). For determining CS  
4 rate, we used those mothers with complete data on Robson's group parameters. Those mothers  
5 with missing data were excluded from analysis.  
6  
7  
8  
9

### 10 **Patient and Public involvement**

11  
12 Patients or public were not involved in the design, or conduct, or reporting, or dissemination plan  
13 of our research.  
14  
15  
16  
17  
18  
19  
20  
21  
22  
23  
24  
25  
26  
27  
28  
29  
30  
31  
32  
33  
34  
35  
36  
37  
38  
39  
40  
41  
42  
43  
44  
45  
46  
47  
48  
49  
50  
51  
52  
53  
54  
55  
56  
57  
58  
59  
60

For peer review only

## Results

In the 12-month study period, there were 4031 women coming to give birth at Hawassa University Referral Hospital. Of these clients, 27 had incomplete records and were excluded, resulting in 4004 women giving birth to 4165 babies for analysis. The mean age of the women was 26 years. It ranged from 13 to 45 years. Their sociodemographic characteristics are shown in Table 1. We notice that many were urban dwellers and housewives, and most had some basic formal education.

For peer review only

**Table 1:** Socio-demographic characteristics of women who gave birth at Hawassa University Referral Hospital, Ethiopia, 2018-2019.

| Variables              | Number | Percent (%) |
|------------------------|--------|-------------|
| Total                  | 4004   | 100         |
| Maternal Age (Years)   |        |             |
| <20                    | 187    | 4.7         |
| 20-34                  | 3467   | 86.6        |
| 35 and above           | 347    | 8.7         |
| Not recorded           | 2      | 0.1         |
| Residence              |        |             |
| Urban                  | 3669   | 91.6        |
| Rural                  | 318    | 7.9         |
| Not recorded           | 17     | 0.4         |
| Educational level      |        |             |
| Cannot read and write  | 283    | 7.1         |
| Primary (1-8)          | 1741   | 43.5        |
| Secondary (9-12)       | 1233   | 30.8        |
| College and above      | 715    | 17.9        |
| Not recorded           | 32     | 0.8         |
| Occupational status    |        |             |
| Housewife              | 2834   | 70.8        |
| Merchant               | 307    | 7.7         |
| Employer               | 624    | 15.6        |
| Others*                | 167    | 4.2         |
| Not recorded           | 72     | 1.8         |
| Marital status         |        |             |
| Married                | 3949   | 98.6        |
| Single                 | 29     | 0.7         |
| Divorced/Widowed       | 9      | 0.2         |
| Not recorded           | 17     | 0.4         |
| Referred to give birth |        |             |
| Yes                    | 1468   | 36.7        |
| No                     | 2536   | 63.3        |

\*Daily labourer, student, farmer

The obstetric characteristics of the study participants and the outcomes of the women who gave birth are given in Table 2. Two out of five (41.1%) of the study participants were nulliparous. Almost all of the study participants had had at least one ANC visit during this pregnancy. Of all births, 15.1% were preterm. CS was performed on 1314 (32.8%) women, 165 (12.6%) of them planned. The perinatal mortality was 75 perinatal death/1000 live births was based on deaths occurring in the hospital.

**Table 2:** Obstetrics characteristics of women who gave birth and their outcomes, at Hawassa University Referral Hospital, Ethiopia, 2018-2019

| Variables                            |                        | Number | Percent (%) |
|--------------------------------------|------------------------|--------|-------------|
| Age at first marriage                | 18 years or less       | 1091   | 27.2        |
|                                      | Above 18 years         | 2861   | 71.5        |
|                                      | Not recorded           | 52     | 1.3         |
| Age at first Pregnancy               | 18 years or less       | 748    | 18.7        |
|                                      | Above 18 years         | 3205   | 80.0        |
|                                      | Not recorded           | 50     | 1.3         |
| Parity                               | 0                      | 1646   | 41.1        |
|                                      | 1-4                    | 2185   | 54.6        |
|                                      | >4                     | 173    | 4.3         |
| ANC this pregnancy                   | Yes                    | 3931   | 98.2        |
|                                      | No                     | 57     | 1.4         |
|                                      | Not recorded           | 16     | 0.4         |
| Gestational Age                      | Pre-term (<37 weeks)   | 606    | 15.1        |
|                                      | Term (37-42 weeks)     | 3253   | 81.2        |
|                                      | Post-term (>42 weeks)  | 145    | 3.6         |
| Onset of labour                      | Induced                | 398    | 9.9         |
|                                      | Spontaneous            | 3441   | 85.9        |
|                                      | Pre-labour CS          | 165    | 4.2         |
| Foetal lie and presentation          | Cephalic               | 3844   | 96.0        |
|                                      | Breech                 | 143    | 3.6         |
|                                      | Transverse/Oblique     | 17     | 0.4         |
| Mode of Delivery                     | Spont.Vaginal Delivery | 2605   | 65.1        |
|                                      | Instrumental delivery  | 85     | 2.1         |
|                                      | CS                     | 1314   | 32.8        |
|                                      | CS emergency           | 1149   | 87.4        |
|                                      | CS planned             | 165    | 12.6        |
| Number of fetus at birth<br>(n=4165) | Singleton              | 3850   | 92.4        |
|                                      | Multiple               | 315    | 7.6         |

|                         |              |      |      |
|-------------------------|--------------|------|------|
| Type of multiple births | Twin         | 292  | 92.7 |
| (n=315)                 | Triplets     | 19   | 6.0  |
|                         | Quadruplets  | 4    | 1.3  |
| Birth Weight (in grams) | <2500        | 592  | 14.2 |
| (n=4165)                | 2500-4000    | 3355 | 80.6 |
|                         | >4000        | 188  | 4.5  |
|                         | Not recorded | 30   | 0.7  |
| Previous CS (n=2358)    | Yes          | 438  | 18.6 |
|                         | No           | 1920 | 81.4 |

Instrumental delivery includes; vacuum and forceps delivery. ANC- antenatal clinic visit, CS caesarean section

### Robson Ten Group Classification System

Table 3 shows the women who gave birth according to Robson classification. We notice that the groups most represented by type of obstetrics population (group size) were: multiparous women without previous CS; women with a singleton pregnancy in spontaneous labour (group 3); nulliparous women with singleton pregnancy in spontaneous labour (group 1); and women with pre-term birth (group 10).

The overall CS rate in this study was 32.8% (95% CI: 31.4%, 34.3%). The major contributors to the overall CS rate were: Group 1 (nulliparous women with singleton pregnancy in spontaneous labour), group 5 (multiparous women with at least one previous CS) and group 3 (multiparous women without previous CS, with singleton pregnancy in spontaneous labour) (Table 3).

From an obstetrician's perspective, the most common indications for CS were foetal compromise, obstructed labour and previous CS (Figure 1: Indications for performing caesarean section (CS) among women who gave birth at Hawassa University Referral Hospital, Ethiopia, 2018-2019). In this study, 227/1314 (17.3%) CS were performed for absolute maternal indications. For non-absolute indications, CS was performed in 968/1314 (73.7%) of cases, mainly non-reassuring foetal heartbeat pattern (foetal distress). The remaining 9.0% of CS could not be classified in this way, and included post-term pregnancy, premature rupture of membrane, multiple pregnancies, and polyhydramnios/oligohydramnios.

**Table 3.** Robson's Classification system among women who gave birth at Hawassa University Referral Hospital, Hawassa, South Ethiopia, 2018-2019

| Robson Group                                                                                           | CS in Group | Number in Group | Group size (%) | CS in group (%) | Absolute group contribution to overall CS rate (%) | Relative contribution of the group to the overall CS rate (%) |
|--------------------------------------------------------------------------------------------------------|-------------|-----------------|----------------|-----------------|----------------------------------------------------|---------------------------------------------------------------|
| <b>Group 1</b> (nulliparous with singleton pregnancy in spontaneous labour)                            | 301         | 1094            | 27.3           | 27.5            | 7.5                                                | 22.9                                                          |
| <b>Group 2</b> (nulliparous women with singleton pregnancy who had induced labour or pre-labour CS)    | 97          | 227             | 5.7            | 42.7            | 2.4                                                | 7.4                                                           |
| <b>Group 2a</b> (induced labour)                                                                       | 55          | 185             | 4.6            | 29.7            | 1.4                                                | 4.2                                                           |
| <b>Group 2b</b> (pre-labour CS)                                                                        | 42          | 42              | 1.1            | 100.0           | 1.0                                                | 3.2                                                           |
| <b>Group 3</b> (multiparous women without previous CS, with singleton pregnancy in spontaneous labour) | 227         | 1356            | 33.9           | 16.7            | 5.7                                                | 17.3                                                          |
| <b>Group 4</b> (multiparous without previous CS, singleton with induced labour or pre-labour CS)       | 68          | 158             | 3.9            | 43.0            | 1.7                                                | 5.2                                                           |
| <b>Group 4a</b> (induced labour)                                                                       | 33          | 123             | 3.1            | 26.8            | 0.8                                                | 2.5                                                           |
| <b>Group 4b</b> (pre-labour CS)                                                                        | 35          | 35              | 0.8            | 100.0           | 0.9                                                | 2.7                                                           |



|                                                                  |             |             |               |             |             |               |
|------------------------------------------------------------------|-------------|-------------|---------------|-------------|-------------|---------------|
| <b>Group 5</b> (multiparous women with at least one previous CS) | 281         | 362         | 9.0           | 77.6        | 7.0         | 21.4          |
| <b>Group 5.1</b> (one previous CS)                               | 214         | 290         | 7.2           | 73.8        | 5.3         | 16.3          |
| <b>Group 5.2</b> (two or more previous CS)                       | 57          | 72          | 1.8           | 79.2        | 1.4         | 4.3           |
| <b>Group 6</b> (nulliparous women with singleton breech)         | 38          | 46          | 1.2           | 82.6        | 0.9         | 2.9           |
| <b>Group 7</b> (multiparous women with singleton breech)         | 58          | 65          | 1.6           | 89.2        | 1.4         | 4.4           |
| <b>Group 8</b> (all multiple pregnancies)                        | 91          | 154         | 3.9           | 59.1        | 2.3         | 6.9           |
| <b>Group 9</b> (all women with transverse or oblique lie)        | 16          | 16          | 0.4           | 100.0       | 0.4         | 1.2           |
| <b>Group 10</b> (all women with pre-term delivery)               | 137         | 526         | 13.1          | 26.0        | 3.4         | 10.4          |
| <b>Total</b>                                                     | <b>1314</b> | <b>4004</b> | <b>100.00</b> | <b>32.8</b> | <b>32.8</b> | <b>100.00</b> |

Group size (%) = n of women in the group/total number of women who gave birth in the hospital × 100.

Group CS rate (%) = n of CS in the group/total number of women in the group × 100.

Absolute contribution (%) = n of CS in the group/total number of women who gave birth in the hospital × 100.

Relative contribution (%) = n of CS in the group/total number of CS in the hospital × 100.

## Discussion

A high proportion of women who gave birth in Hawassa University Referral Hospital were through CS, almost a third. The major contributors to the overall CS rate were group 1 (nulliparous with singleton pregnancy in spontaneous labour), group 5 (multiparous women with at least one previous CS) and group 3 (multiparous women without previous CS, with singleton pregnancy in spontaneous labour). The most commonly reported indications for CS were a foetal compromise, previous CS and obstructed labour.

In this study we interpreted the findings based on Robson's implementation manual (20): thus, we assessed the quality of the data, the population attending the services (shown in Appendix 1), and we analysed the proportion of CS in each group (shown in Appendix 2).

Our study had several strengths. To our knowledge, this study is the first study at a major hospital in Ethiopia that assessed the CS rate using Robson's Ten Group Classification System for all labouring mothers. The birth registration was prospective and consecutive; hence the risk of incomplete data were minimized. All women who gave birth in the hospital during the study were included and this may have reduced selection bias.

The study also had some weaknesses. The study was conducted in a single hospital, and since it is a referral hospital, the selection of participants may be biased to some degree, and for this reason the findings might be less generalizable. However, standardization according to Robson is able to be used in such situations. Its use permits valid and useful comparisons to be done even at different levels of care. Another weakness is that the study used birth weight to determine gestational age for some mothers, and this could lead to a misclassification of some births into a wrong Robson group. We assessed whether this results in misclassification among Robson group according to WHO Robson implementation manual and the risk of misclassification was minimal. A third potential weakness involved inconsistent use of partogram and foetal heartbeat. This makes the criteria for decisions and indications for CS unclear and left much up to individual doctor's discretion.

The manual for interpretation of CS rates stated that the size of group 9 (women with *transverse lie*, singletons pregnancy), should be less than 1% of the total and the CS rate

1  
2  
3 should be 100% for this group (20). In our study, the size of group 9 was 0.4% and the CS  
4 rate in this group was 100%, suggesting minimal misclassification in this group, and the  
5 size of group 9 was similar to other studies (20, 25, 26)  
6  
7

8  
9  
10 In our study several indicators were in line with the comparison populations given in  
11 Robson's manual; the proportion of women with *breech* pregnancy (group 6 and 7), the  
12 ratio of the size of group 1 (nulliparous women with singleton pregnancy in *spontaneous*  
13 *labour*) and group 2 (nulliparous women with singleton pregnancy, who had induced  
14 labour or *pre-labour CS*), as well as the ratio of the size of group 3 (multiparous women  
15 without *previous CS*, with singleton pregnancy in *spontaneous labour*) and group 4  
16 (multiparous women without *previous CS*, with singleton pregnancy, who had induced  
17 labour or *pre-labour CS*) (20, 25, 26). However, the proportion of group 1 (*nulliparous*  
18 women with singleton pregnancy in *spontaneous labour*) and group 2 (*nulliparous* women  
19 with singleton pregnancy, who had induced labour or *pre-labour CS*) was slightly lower  
20 than the comparison populations (20, 25, 26). This may be due to the low proportions of  
21 nulliparous women in our study. The proportion of group 3 (*multiparous* women without  
22 previous CS, with singleton pregnancy in *spontaneous labour*) and group 4 (*multiparous*  
23 women without previous CS, with singleton pregnancy, who had induced labour or *pre-*  
24 *labour CS*) was higher than the Robson reference population (20). This may be explained  
25 by the fact that we had a high proportion of multiparous women in our study populations.  
26 According to Robson, the proportion of group 5 (multiparous women with at least one  
27 *previous CS*) should, be about half of all the CS. In our study, the proportion of group 5  
28 represents less than 10% of the total women delivered in the hospital, which may reflect a  
29 low CS rate in previous years. The proportion of group 8 (women with multiple  
30 pregnancies) and group 10 (women with preterm pregnancy) in our study was similar with  
31 the comparison population (20, 25, 26).  
32  
33  
34  
35  
36  
37  
38  
39  
40  
41  
42  
43  
44  
45  
46  
47  
48

49 The CS rate in Robson group 1 (*nulliparous* women with singleton pregnancy in  
50 *spontaneous labour*) was 27.5%, which is much higher than Robson's examples showing  
51 that rates under 10% are achievable (20). This may reflect a selection among nullipara,  
52 where many normal spontaneous deliveries take place at lower health facilities (health  
53 centres and primary hospitals), and those who attend this referral hospital are selected,  
54  
55  
56  
57  
58  
59  
60

1  
2  
3 either referred or they decided themselves for unknown reasons to attend the hospital.  
4  
5 Alternatively, it may reflect a low “threshold” interpreting criterion for a CS.  
6  
7

8 The CS rate in group 2 (*nulliparous* women with singleton pregnancy, who had labour  
9 induced or *pre-labour CS*) was similar to the comparison populations (25, 26), but higher  
10 than Robson's guideline (CS rate between 20-35) (20). This may reflect that the threshold  
11 for deciding on doing CS is too low, and this may happen at extremely busy labour wards;  
12 for example, the ward is so busy that calling a doctor and suggesting a CS in a case of slow  
13 progress may be preferred to a time-consuming trial of labour. This “low” CS threshold  
14 may explain why group 3 (*multiparous* women without previous CS, with singleton  
15 pregnancy in spontaneous labour) also had a higher CS rate (17%) than the comparisons  
16 (3-5%) (20, 25, 26). It could also be partly due to some misclassification by including  
17 women from group 5 (*multiparous* women with at least one *previous CS*) in group 3, but  
18 this is less likely.  
19  
20  
21  
22  
23  
24  
25  
26  
27

28 Robson guideline stated that the CS rate in group 4 (*multiparous* women without a previous CS,  
29 with singleton pregnancy, who had induced labour or *pre-labour CS*) is rarely should be higher  
30 than 15%, while in our study this rate was much higher (43%). This may be because of the high  
31 CS rate in women who underwent induction of labour (group 4a) (26.8%), which contributed to  
32 the high overall CS rate in group 4. Also, it may partly be due to a high proportion of failed  
33 inductions, or possible misclassifications by including group 5 (*multiparous* women with at least  
34 one *previous CS*) in group 4.  
35  
36  
37  
38  
39  
40  
41

42 The CS rate in group 5 (*multiparous* women with at least one *previous CS*) in our study was  
43 77.6%, which is higher than the Robson guideline (50-60%) (20). This indicates that in our  
44 study, too few women were offered a trial of labour after having had previous CS.  
45  
46  
47

48 The CS rate for breech in group 6 (*nulliparous* women with singleton *breech* pregnancy) and  
49 group 7 (*multiparous* women with a singleton *breech* pregnancy including previous CS) in our  
50 study was similar to comparison populations (20, 25, 26).  
51  
52  
53  
54  
55  
56  
57  
58  
59  
60

1  
2  
3 The examples given by Robson in his guideline stated that nullipara and women with a previous  
4 CS contribute to 66% of CS at the hospital, comprising group 1 (*nulliparous* women with  
5 CS contribute to 66% of CS at the hospital, comprising group 1 (*nulliparous* women with  
6 singleton pregnancy in *spontaneous labour*), group 2 (*nulliparas* women with singleton  
7 pregnancy, who had induced labour or *pre-labour CS*) and group 5 (*multiparous* women with at  
8 least one *previous CS*) (20). In our study, the relative contribution of these three groups (1,2,5) to  
9 the overall CS rate was 51.7%. This difference may be that the study area had few nullipara with  
10 planned CS, as seen in the low relative contribution of group 2 (*nulliparas* women with singleton  
11 pregnancy, who had induced labour or *pre-labour CS*) to the overall CS rate which in our study  
12 was (7.38%).  
13  
14  
15  
16  
17  
18  
19

20 The overall CS rate in our hospital (32.8%) is higher than the WHO recommendation 10-15%  
21 (3). The high CS rate in our study may be due to several issues. One probable factor could be  
22 that the hospital is a referral hospital where more than a third of women referred to this hospital  
23 with different emergency situations that may need emergency management through CS delivery.  
24 Another factor could be that Hawassa University referral hospital as a teaching hospital has  
25 doctors under specialist training performing CS without following strict indications for  
26 performing CS. Another possible driving factors for this high CS rate could be the hospital is a  
27 referral hospital where more than a third of women referred to this hospital with different  
28 emergency situations that may need emergency management through CS delivery (27). Nearly  
29 three-quarters (73.7%) of CS in this study was performed for non-absolute maternal indications,  
30 mainly foetal distress, and CS may be performed for some women without clear appropriate  
31 indications. Foetal monitoring was not optimal, and this may have contributed to the high  
32 prevalence of “foetal distress”. Also, a large proportion were urban women (91.6%) who gave  
33 birth in the hospital, and urban women are shown to have higher CS rates than the rural women  
34 in other settings also (28-30).  
35  
36  
37  
38  
39  
40  
41  
42  
43  
44  
45  
46  
47

48 Our study showed that Robson group 1 (*nulliparous* women with singleton pregnancy in  
49 *spontaneous labour*), group 5 (*multiparous* women with at least one *previous CS*) and  
50 group 3 (*multiparous* women without previous CS, with singleton pregnancy in  
51 *spontaneous labour*) were the major contributors to the overall CS rate. These same groups  
52 were the major contributors in the eastern Ethiopia and elsewhere (16, 31-36), though the  
53  
54  
55  
56  
57  
58  
59  
60

1  
2  
3 order was different. The difference in the order of these groups among the studies may  
4 because of the variation in study populations and overall CS rate (20). The high contribution  
5 of emergency CS in nullipara (group 1, nulliparous women with singleton pregnancy in  
6 spontaneous labour) in our study may be related to inappropriate indications of CS delivery  
7 in this group in our study hospital. More than one third (35%) of CS performed in this  
8 group is due to abnormal foetal heartbeat patterns. This was high, indicating the possibility  
9 of misdiagnosis of abnormal foetal heartbeat pattern. A more active use of the partogram  
10 as a tool for decision-making would help clinicians and midwives decide more  
11 consistently, instead of relying on too heavily health care workers individual assessment in  
12 a busy ward.  
13  
14  
15  
16  
17  
18  
19  
20

21 The most commonly reported indications for CS were foetal compromise, previous CS and  
22 obstructed labour; similar indications have been reported from eastern Ethiopia (16) and  
23 elsewhere in Africa, Asia and Australia (34, 36-39).  
24  
25  
26  
27

28 In conclusion, this study has shown a high overall CS rate at Hawassa University Referral  
29 Hospital. Nulliparous women with singleton pregnancy in spontaneous labour (group 1),  
30 multiparous women with at least one previous CS (group 5) and multiparous women  
31 without previous CS, with singleton pregnancy, in spontaneous labour (group 3) were the  
32 major contributors to the overall high CS rates. Foetal compromise, previous CS and  
33 obstructed labour were the major indications for performing CS. There was a high CS rate  
34 in low-risk groups (group 1 and 3). We recommend that all labouring women be regularly  
35 followed with partogram, and that they be given the opportunity for instrumental delivery  
36 to decrease the use of primary CS among low risk groups. Foetal heartbeat monitoring  
37 system should be improved to reduce unnecessary CS that could be done due to  
38 misdiagnosis of foetal distress. The reasons for the high CS rate among low-risk groups  
39 should be explored and the appropriateness of CS should be evaluated to reduce the overall  
40 CS rate, which benefits the health system, in general.  
41  
42  
43  
44  
45  
46  
47  
48  
49  
50  
51  
52  
53  
54  
55  
56  
57  
58  
59  
60

**Author affiliations:**

<sup>1</sup> School of Public Health, College of Medicine and Health Sciences, Hawassa University, Hawassa, Ethiopia.

<sup>2</sup> Centre for International Health (CIH), University of Bergen, Bergen, Norway

**Acknowledgements:**

We would like to thank Hawassa University Referral Hospital management and the Head of its Obstetrics Ward for creating a conducive environment in order to accomplish this research. We want to extend our thanks to NORHED-SENUPH project for financial support.

**Author Contributions:**

AAA and BL conceived the study and analysed the data. AAA wrote the proposal and the first draft of the manuscript. SGH, AGT, and BL supervised and provided mentorship. All authors contributed to the writing and reviewed the article and approved the final version of the manuscript.

**Patient consent:** Written consent was obtained from all delivering mothers to participate in this study. The interview was conducted at a convenient time for the women; before delivery and after delivery before discharge from the hospital, and no woman declined to participate in the study. Written consent was obtained from illiterate women after data collectors read information described in the consent form in the language they can understand. After they agreed on the information read for them, they signed on the consent form by using their thumb stump (fingerprint).

The consent was made according to ethical principles of “autonomy” by including statements that give participants the right to decline participation in the study at any time. The consent also included statements of potential risk, benefits and confidentiality.

**Ethics approval:** This study was approved by Hawassa University College of Medicine and Health Sciences Institutional Review Board (ref.no.IRB/007/10), and Regional Ethical Committee (Rek Vest) (ref.no.2018/595) in Norway.

1  
2  
3 **Funding:** Financial support was obtained from NORHED through the SENU PH (Southern  
4 Ethiopia Network of University in Public Health) project (ETH-13/0025).

5  
6 **Disclaimer:** The funding organisation has no role in the design, execution or decision to publish  
7 the study.  
8

9  
10 **Competing interests:** None declared

11  
12 **Data sharing statement:** Data are available upon reasonable request  
13  
14  
15  
16  
17  
18  
19  
20  
21  
22  
23  
24  
25  
26  
27  
28  
29  
30  
31  
32  
33  
34  
35  
36  
37  
38  
39  
40  
41  
42  
43  
44  
45  
46  
47  
48  
49  
50  
51  
52  
53  
54  
55  
56  
57  
58  
59  
60

For peer review only



## References

1. Biccadd BM, Madiba TE, Kluys HL, Munlemvo DM, Madzimbamuto FD, Basenero A, et al. Perioperative patient outcomes in the African Surgical Outcomes Study: a 7-day prospective observational cohort study. *Lancet (London, England)*. 2018;391(10130):1589-98.
2. WHO Statement on caesarean section rates. *Reprod Health Matters*. 2015;23(45):149-50.
3. WHO. Appropriate technology for birth. *Lancet (London, England)*. 1985;2(8452):436-7.
4. Betran AP, Torloni MR, Zhang J, Ye J, Mikolajczyk R, Deneux-Tharaux C, et al. What is the optimal rate of caesarean section at population level? A systematic review of ecologic studies. *Reproductive health*. 2015;12:57.
5. Federal Ministry of Health. Implementation manual for health care financing reports; 2010. Addis Ababa, Ethiopia.
6. Witter S, Boukhalfa C, Cresswell JA, Daou Z, Filippi V, Ganaba R, et al. Cost and impact of policies to remove and reduce fees for obstetric care in Benin, Burkina Faso, Mali and Morocco. *Int J Equity Health*. 2016;15(1):123.
7. Souza JP, Gulmezoglu A, Lumbiganon P, Laopaiboon M, Carroli G, Fawole B, et al. Caesarean section without medical indications is associated with an increased risk of adverse short-term maternal outcomes: the 2004-2008 WHO Global Survey on Maternal and Perinatal Health. *BMC Med*. 2010;8:71.
8. Villar J, Carroli G, Zavaleta N, Donner A, Wojdyla D, Faundes A, et al. Maternal and neonatal individual risks and benefits associated with caesarean delivery: multicentre prospective study. *BMJ (Clinical research ed)*. 2007;335(7628):1025.
9. Zhang Y, Zhou J, Ma Y, Liu L, Xia Q, Fan D, et al. Mode of delivery and preterm birth in subsequent births: A systematic review and meta-analysis. *PloS one*. 2019;14(3):e0213784.
10. Kok N, Ruiter L, Hof M, Ravelli A, Mol BW, Pajkrt E, et al. Risk of maternal and neonatal complications in subsequent pregnancy after planned caesarean section in a first birth, compared with emergency caesarean section: a nationwide comparative cohort study. *BJOG : an international journal of obstetrics and gynaecology*. 2014;121(2):216-23.
11. Huang X, Lei J, Tan H, Walker M, Zhou J, Wen SW. Cesarean delivery for first pregnancy and neonatal morbidity and mortality in second pregnancy. *European journal of obstetrics, gynecology, and reproductive biology*. 2011;158(2):204-8.
12. Betran AP, Ye J, Moller AB, Zhang J, Gulmezoglu AM, Torloni MR. The Increasing Trend in Caesarean Section Rates: Global, Regional and National Estimates: 1990-2014. *PloS one*. 2016;11(2):e0148343.
13. Boerma T, Ronsmans C, Melesse DY, Barros AJD, Barros FC, Juan L, et al. Global epidemiology of use of and disparities in caesarean sections. *Lancet (London, England)*. 2018;392(10155):1341-8.
14. Central Statistical Agency (CSA) [Ethiopia] and ICF. Ethiopia Demographic and Health Survey 2016. Addis Ababa, Ethiopia, and Rockville, Maryland, USA. Ethiopia Demographic and Health Survey: CSA and ICF, 2016.
15. Fesseha N, Getachew A, Hiluf M, Gebrehiwot Y, Bailey P. A national review of cesarean delivery in Ethiopia. *International journal of gynaecology and obstetrics: the official organ of the International Federation of Gynaecology and Obstetrics*. 2011;115(1):106-11.
16. Tura AK, Pijpers O, de Man M, Cleveringa M, Koopmans I, Gure T, et al. Analysis of caesarean sections using Robson 10-group classification system in a university hospital in eastern Ethiopia: a cross-sectional study. *BMJ open*. 2018;8(4):e020520.
17. Torloni MR, Betran AP, Souza JP, Widmer M, Allen T, Gulmezoglu M, et al. Classifications for cesarean section: a systematic review. *PloS one*. 2011;6(1):e14566.

18. Betran AP, Vindevoghel N, Souza JP, Gulmezoglu AM, Torloni MR. A systematic review of the Robson classification for caesarean section: what works, doesn't work and how to improve it. *PloS one*. 2014;9(6):e97769.
19. Robson M. The Ten Group Classification System (TGCS) - a common starting point for more detailed analysis. *BJOG : an international journal of obstetrics and gynaecology*. 2015;122(5):701.
20. Robson Classification: Implementation Manual. Geneva: World Health Organization; 2017. Licence: CC BY-NC-SA 3.0IGO. .
21. Ethiopian Public Health Institute (EPHI) [Ethiopia] and ICF. 2019. Ethiopia Mini Demographic and Health Survey 2019: Key Indicators. Rockville, Maryland, USA: EPHI and ICF.
22. Federal Ministry of Health. National Health Workforce Update. Human Resource Development Directorate Bulletin 2nd Edition. 2019. Addis Ababa, Ethiopia.
23. Per Bergsjø, Joseph Mlay, Olola Oneko, Shao J. Instructions manual for Registration of deliveries at the KCMC Birth Registry, Revised Edition: Department of Obstetrics and Gynecology KCMC Moshi, Tanzania and Department of Public Health and Primary Health Care University of Bergen Bergen, Norway, 2010.
24. Stanton C, Ronsmans C. Recommendations for routine reporting on indications for cesarean delivery in developing countries. *Birth (Berkeley, Calif)*. 2008;35(3):204-11.
25. Senanayake H, Piccoli M, Valente EP, Businelli C, Mohamed R, Fernando R, et al. Implementation of the WHO manual for Robson classification: an example from Sri Lanka using a local database for developing quality improvement recommendations. *BMJ open*. 2019;9(2):e027317.
26. Souza JP, Betran AP, Dumont A, de Mucio B, Gibbs Pickens CM, Deneux-Tharaux C, et al. A global reference for caesarean section rates (C-Model): a multicountry cross-sectional study. *BJOG : an international journal of obstetrics and gynaecology*. 2016;123(3):427-36.
27. Sørbye IK, Vangen S, Oneko O, Sundby J, Bergsjø P. Caesarean section among referred and self-referred birthing women: a cohort study from a tertiary hospital, northeastern Tanzania. *BMC pregnancy and childbirth*. 2011;11:55.
28. Amjad A, Amjad U, Zakar R, Usman A, Zakar MZ, Fischer F. Factors associated with caesarean deliveries among child-bearing women in Pakistan: secondary analysis of data from the Demographic and Health Survey, 2012-13. *BMC pregnancy and childbirth*. 2018;18(1):113.
29. Azene AG, Aragaw AM, Birlie MG. Multilevel modelling of factors associated with caesarean section in Ethiopia: community based cross sectional study. *BMC research notes*. 2019;12(1):724.
30. de Loenzien M, Schantz C, Luu BN, Dumont A. Magnitude and correlates of caesarean section in urban and rural areas: A multivariate study in Vietnam. *PloS one*. 2019;14(7):e0213129.
31. Abdel-Aleem H, Shaaban OM, Hassanin AI, Ibraheem AA. Analysis of cesarean delivery at Assiut University Hospital using the Ten Group Classification System. *International journal of gynaecology and obstetrics: the official organ of the International Federation of Gynaecology and Obstetrics*. 2013;123(2):119-23.
32. Costa ML, Cecatti JG, Souza JP, Milanez HM, Gulmezoglu MA. Using a Caesarean Section Classification System based on characteristics of the population as a way of monitoring obstetric practice. *Reproductive health*. 2010;7:13.
33. Litorp H, Kidanto HL, Nystrom L, Darj E, Essen B. Increasing caesarean section rates among low-risk groups: a panel study classifying deliveries according to Robson at a university hospital in Tanzania. *BMC pregnancy and childbirth*. 2013;13:107.
34. Tapia V, Betran AP, Gonzales GF. Caesarean Section in Peru: Analysis of Trends Using the Robson Classification System. *PloS one*. 2016;11(2):e0148138.
35. Yadav RG, Maitra N. Examining Cesarean Delivery Rates Using the Robson's Ten-group Classification. *J Obstet Gynaecol India*. 2016;66(Suppl 1):1-6.

- 1  
2  
3 36. Tognon F, Borghero A, Putoto G, Maziku D, Torelli GF, Azzimonti G, et al. Analysis of  
4 caesareansection and neonatal outcome using the Robson classification in a rural district hospital in  
5 Tanzania: an observational retrospective study. *BMJ open*. 2019;9(12):e033348.  
6  
7 37. Begum T, Nababan H, Rahman A, Islam MR, Adams A, Anwar I. Monitoring caesarean births  
8 using the Robson ten group classification system: A cross-sectional survey of private for-profit facilities  
9 in urban Bangladesh. *PloS one*. 2019;14(8):e0220693.  
10 38. Makhanya V, Govender L, Moodley J. Utility of the Robson Ten Group Classification System to  
11 determine appropriateness of caesarean section at a rural regional hospital in KwaZulu-Natal, South  
12 Africa. *SAMJ*. 2015;105(4):292-5.  
13 39. Tanaka K, Mahomed K. The Ten-Group Robson Classification: A Single Centre Approach  
14 Identifying Strategies to Optimise Caesarean Section Rates. *Obstet Gynecol Int*. 2017;2017:5648938.  
15  
16  
17  
18  
19  
20  
21  
22  
23  
24  
25  
26  
27  
28  
29  
30  
31  
32  
33  
34  
35  
36  
37  
38  
39  
40  
41  
42  
43  
44  
45  
46  
47  
48  
49  
50  
51  
52  
53  
54  
55  
56  
57  
58  
59  
60

## LEGENDS

**Figure 1.** Indications for performing caesarean section (CS) among women who gave birth at Hawassa University Referral Hospital, Ethiopia, 2018-2019)

**Box 1.** Robson's 10-group classification

**Table 1.** Socio-demographic characteristics of women who gave birth at Hawassa University Referral Hospital, Ethiopia, 2018-2019.

**Table 2.** Obstetrics characteristics of women who gave birth and their outcomes, at Hawassa University Referral Hospital, Ethiopia, 2018-2019

**Table 3.** Robson's Classification system among women who gave birth at Hawassa University Referral Hospital, Hawassa, South Ethiopia, 2018-2019



**Figure 1.** Indications for performing caesarean section (CS) among women who gave birth at Hawassa University Referral Hospital, Ethiopia, 2018-2019.

Foetal compromise = Foetal distress, cord prolapse, and intrauterine growth restriction. Failure to progress = Prolonged labour, cervical arrest, and failed induction. Obstructed labour = Cephalopelvic disproportion, macrosomia, and unspecified disproportions. Malpresentation = Transverse, oblique or brow. Others = Post term pregnancy, premature rupture of membrane, multiple pregnancies and polyhydramnios/oligohydramnios. APH, antepartum haemorrhage.

**Appendix 1:** Assessment of the type of Populations among women who gave birth at Hawassa University Referral Hospital, Hawassa, South Ethiopia.

| <b>Steps for Interpretation</b>   | <b>Interpretation by Robson</b> | <b>Example: MCS Population</b> | <b>Sri Lanka study</b> | <b>Our finding</b> | <b>Additional information from the data</b> | <b>Final Interpretation</b>                                                                                                                                                                                                                                                                                       |
|-----------------------------------|---------------------------------|--------------------------------|------------------------|--------------------|---------------------------------------------|-------------------------------------------------------------------------------------------------------------------------------------------------------------------------------------------------------------------------------------------------------------------------------------------------------------------|
| <b>Step 1:</b> Size of group 1+ 2 | 35-42%                          | 38.1%                          | 38.1%                  | 32.99%             | Nulliparas in our population 41.1%          | Rate is lower than all the three references by Robson, MCS and Sri Lanka populations. This might be due to a low proportion of nullipara women in our Hospital. There is also a possibility of misclassification (group 1 misclassified as group 10) since we determined gestational based new-born birth weight. |
| <b>Step 2:</b> Size of Group 3+4  | 30%                             | 46.5%                          | 37.3%                  | 37.81%             | Multiparous in our population 58.9%         | Rate higher than Robson reference population, in line with Sri Lanka reference population and lower than MCS examples. This may be explained by a high proportion of multiparous women in our population                                                                                                          |
| <b>Step 3:</b> Size of group 5    | Half of the total CS rate       | 7.2%                           | 10.9%                  | 9.04%              | -                                           | Lower than half of total CS. This, as suggested by the WHO manual, may be due to relatively low CS rate in the previous years, or to a recently increased CS rate or misclassification.                                                                                                                           |
| <b>Step 4:</b> size of group 6+7  | 3-4%                            | 2.7%                           | 3.4%                   | 2.77%              | -                                           | Rate is in line with Robson, MCS and Sri Lanka reference populations                                                                                                                                                                                                                                              |
| <b>Step 5:</b> Size of group 8    | 1.5-2%                          | 0.9%                           | 1.1%                   | 3.85%              | 36.7% of women delivered in our Hospitals   | Rate is higher than Robson, MCS and Sri Lanka reference populations. This may be due to high referral cases in our hospital as suggested by the WHO manual.                                                                                                                                                       |

|                                                            |                   |           |           |           |                                                                            |                                                                                                                                                                                                                                                                                                                                                    |
|------------------------------------------------------------|-------------------|-----------|-----------|-----------|----------------------------------------------------------------------------|----------------------------------------------------------------------------------------------------------------------------------------------------------------------------------------------------------------------------------------------------------------------------------------------------------------------------------------------------|
|                                                            |                   |           |           |           | 15.1% of all women who gave birth in our hospital delivered preterm birth. | Rate is higher than Robson, MCS and Sri Lanka reference populations. This may be due to high referral cases and high preterm birth in our hospital. The hospital is a tertiary hospital were most high-risk pregnancies referred to. There is also a possibility of misclassification since we determined gestational based new-born birth weight. |
| <b>Step 6:</b> Size of group 10                            | <10%              | 4.2%      | 7.8%      | 13.14%    | 15.1% of all women who gave birth in our hospital delivered preterm birth. | Rate is higher than Robson, MCS and Sri Lanka reference populations. This may be due to high referral cases and high preterm birth in our hospital. The hospital is a tertiary hospital were most high-risk pregnancies referred to. There is also a possibility of misclassification since we determined gestational based new-born birth weight. |
| <b>Step 7:</b> Ratio of the size of group 1 versus group 2 | Ratio 2 or higher | Ratio 3.3 | Ratio 1.5 | Ratio 4.8 | -                                                                          | The rate in line with Robson and MCS example reference populations                                                                                                                                                                                                                                                                                 |
| <b>Step 8:</b> Ratio of size of group 3 versus group 4     | >2:1              | Ratio 6.3 | Ratio 2.6 | Ratio 8.6 | -                                                                          | Rate in line with Robson and MCS example reference populations                                                                                                                                                                                                                                                                                     |
| <b>Step 9:</b> Ratio of size of group 6 versus group 7     | Usually 2:1       | Ratio 0.8 | Ratio 1.2 | Ratio 0.7 | Multiparous in our population 58.9%                                        | The rate in line with MCS and Sri Lanka reference populations, but lower than Robson references. This may be explained by a high proportion of Multiparous women in our population.                                                                                                                                                                |

1  
2  
3  
4  
5  
6  
7  
8  
9  
10  
11  
12  
13  
14  
15  
16  
17  
18  
19  
20  
21  
22  
23  
24  
25  
26  
27  
28  
29  
30  
31  
32  
33  
34  
35  
36  
37  
38  
39  
40  
41  
42  
43  
44  
45  
46  
47

**Appendix 2:** Assessment of CS Rates among women who gave birth at Hawassa University Referral Hospital, Hawassa, South Ethiopia.

| <b>Steps for Interpretation</b>    | <b>Interpretation by Robson</b>     | <b>Example: MCS Population</b> | <b>Sri Lanka study</b> | <b>Our finding</b> | <b>Additional information from the data</b>                                      | <b>Final Interpretation</b>                                                                                                                                                                                                                                                                     |
|------------------------------------|-------------------------------------|--------------------------------|------------------------|--------------------|----------------------------------------------------------------------------------|-------------------------------------------------------------------------------------------------------------------------------------------------------------------------------------------------------------------------------------------------------------------------------------------------|
| <b>Step 1:</b> CS rate in group 1  | Under 10% are achievable            | 9.8%                           | 18.8%                  | 27.5%              | 35.0% of CS delivery is due to Abnormal foetal heartbeat pattern in our hospital | CS rate is higher than Robson, MCS, and Sri Lanka. This might due to a high ratio of group 1 to group 2 population in our study which indicates a higher CS rate in these groups as suggested by the WHO manual. It might also due to inappropriate indications of CS delivery in our hospital. |
| <b>Step 2:</b> CS rate in group 2  | Consistently around 20%–35%         | 39.8%                          | 41.0%                  | 42.7%              | - Failed induction was an indication in 36.0% of group 2a.                       | CS rate in line with Sri Lanka, but higher than MCS and Robson references. This may be possibly due to inappropriate indications of CS in the induction of labour and pre-labour CS.                                                                                                            |
| <b>Step 3:</b> CS rate in Group 3  | Not higher than 3.0%.               | 3.0%                           | 5.2%                   | 16.7%              | -Obstructed labour was an indication in 51.5%.                                   | CS rate is higher than Robson, MCS, and Sri Lanka. This may be explained by misclassification (group 5 misclassified as group 3).                                                                                                                                                               |
| <b>Step 4:</b> CS rate for group 4 | It rarely should be higher than 15% | 23.7%                          | 16.8%                  | 43.04%             | Failed induction was an indication in 24.0% of group 4a.                         | CS rate is higher than Robson, MCS, and Sri Lanka. There was a high CS rate in group 4a (26.8%) which contributed to the high CS rate in group 4 in our study. The possible explanation may high failed induction or there might be misclassifications (group 5 misclassified as group 4).      |



|                                                                                  |                                                                        |                                 |                                                               |                                                               |                                                                              |                                                                                                                                                                                                                                                                  |
|----------------------------------------------------------------------------------|------------------------------------------------------------------------|---------------------------------|---------------------------------------------------------------|---------------------------------------------------------------|------------------------------------------------------------------------------|------------------------------------------------------------------------------------------------------------------------------------------------------------------------------------------------------------------------------------------------------------------|
| <b>Step 5:</b> CS rate in group 5                                                | Rates of 50%– 60% are considered appropriate                           | 74.4%                           | 81.8%                                                         | 77.6%                                                         | Previous CS was the indication in 72.8%. Rate of prelabour CS was 33.9%      | CS rate is higher than Robson and MCS examples but lower than the Sri Lanka study. This may be due to a high indication of CS due to previous CS, low offer of a trial of labour or VBAC (Vaginal birth after CS delivery), women's preference for repeating CS. |
| <b>Step 6:</b> CS rate for group 8                                               | Usually around 60%                                                     | 57.7%                           | 80.9%                                                         | 59.1%                                                         | -                                                                            | CS rate in line with Robson and MCS example.                                                                                                                                                                                                                     |
| <b>Step 7:</b> CS rate in group 10                                               | Usually around 30%                                                     | 25.1%                           | 41.1%                                                         | 26.05%                                                        | -                                                                            | CS rate in line with Robson and MCS example                                                                                                                                                                                                                      |
| <b>Step 8:</b> Relative contribution of groups 1, 2 and 5 to the overall CS rate | Normally contribute to 2/3 (66%) of all CS performed in most hospitals | Contributed to 63.7% of all CS  | 63.9%                                                         | 51.7%                                                         | The relative contribution of group 2 to the overall CS rate was low (7.38%). | CS rate lower than Robson, MCS example and Sri Lanka study. This may be due to the relative contribution of group 2 to the overall CS rate which was low. The size of group 2 may also be contributed due to the misclassification of the pre-term as a term.    |
| <b>Step 9:</b> Absolute contribution of group 5 to overall CS rate               | NA                                                                     | Responsible for 28.9% of all CS | Absolute contribution: 8.87%<br>Relative contribution: 29.59% | Absolute contribution: 7.02%<br>Relative contribution: 21.39% | -                                                                            | The absolute contribution was not indicated in the WHO Robson manual, but our study finding was lower than the MCS example and Sri Lanka study.                                                                                                                  |

# STROBE\_ Cross sectional Check list

|                           | Reporting Item                                                                                                                                              | Page Number |
|---------------------------|-------------------------------------------------------------------------------------------------------------------------------------------------------------|-------------|
| <b>Title and abstract</b> |                                                                                                                                                             |             |
| Title                     | <a href="#">#1a</a> Indicate the study's design with a commonly used term in the title or the abstract                                                      | 1           |
| Abstract                  | <a href="#">#1b</a> Provide in the abstract an informative and balanced summary of what was done and what was found                                         | 1           |
| <b>Introduction</b>       |                                                                                                                                                             |             |
| Background / rationale    | <a href="#">#2</a> Explain the scientific background and rationale for the investigation being reported                                                     | 3           |
| Objectives                | <a href="#">#3</a> State specific objectives, including any prespecified hypotheses                                                                         | 4           |
| <b>Methods</b>            |                                                                                                                                                             |             |
| Study design              | <a href="#">#4</a> Present key elements of study design early in the paper                                                                                  | 4           |
| Setting                   | <a href="#">#5</a> Describe the setting, locations, and relevant dates, including periods of recruitment, exposure, follow-up, and data collection          | 4           |
| Eligibility criteria      | <a href="#">#6a</a> Give the eligibility criteria, and the sources and methods of selection of participants.                                                | 4           |
|                           | <a href="#">#7</a> Clearly define all outcomes, exposures, predictors, potential confounders, and effect modifiers. Give diagnostic criteria, if applicable | 5           |

|    |                |                      |                                                        |                             |
|----|----------------|----------------------|--------------------------------------------------------|-----------------------------|
| 1  | Data sources / | <a href="#">#8</a>   | For each variable of interest give sources of data and | 5,6                         |
| 2  | measurement    |                      | details of methods of assessment (measurement).        |                             |
| 3  |                |                      | Describe comparability of assessment methods if        |                             |
| 4  |                |                      | there is more than one group. Give information         |                             |
| 5  |                |                      | separately for for exposed and unexposed groups if     |                             |
| 6  |                |                      | applicable.                                            |                             |
| 7  |                |                      |                                                        |                             |
| 8  |                |                      |                                                        |                             |
| 9  |                |                      |                                                        |                             |
| 10 |                |                      |                                                        |                             |
| 11 |                |                      |                                                        |                             |
| 12 | Bias           | <a href="#">#9</a>   | Describe any efforts to address potential sources of   | 6                           |
| 13 |                |                      | bias                                                   |                             |
| 14 |                |                      |                                                        |                             |
| 15 |                |                      |                                                        |                             |
| 16 | Study size     | <a href="#">#10</a>  | Explain how the study size was arrived at              | N/A, we have included all   |
| 17 |                |                      |                                                        | laboring mothers during the |
| 18 |                |                      |                                                        | study period.               |
| 19 |                |                      |                                                        |                             |
| 20 |                |                      |                                                        |                             |
| 21 |                |                      |                                                        |                             |
| 22 | Quantitative   | <a href="#">#11</a>  | Explain how quantitative variables were handled in     | 5                           |
| 23 | variables      |                      | the analyses. If applicable, describe which groupings  |                             |
| 24 |                |                      | were chosen, and why                                   |                             |
| 25 |                |                      |                                                        |                             |
| 26 |                |                      |                                                        |                             |
| 27 |                |                      |                                                        |                             |
| 28 | Statistical    | <a href="#">#12a</a> | Describe all statistical methods, including those used | 6,7                         |
| 29 | methods        |                      | to control for confounding                             |                             |
| 30 |                |                      |                                                        |                             |
| 31 |                |                      |                                                        |                             |
| 32 | Statistical    | <a href="#">#12b</a> | Describe any methods used to examine subgroups         | N/A, our study was purely   |
| 33 | methods        |                      | and interactions                                       | descriptive                 |
| 34 |                |                      |                                                        |                             |
| 35 |                |                      |                                                        |                             |
| 36 |                |                      |                                                        |                             |
| 37 | Statistical    | <a href="#">#12c</a> | Explain how missing data were addressed                | 7                           |
| 38 | methods        |                      |                                                        |                             |
| 39 |                |                      |                                                        |                             |
| 40 |                |                      |                                                        |                             |
| 41 | Statistical    | <a href="#">#12d</a> | If applicable, describe analytical methods taking      | N/A, our study design       |
| 42 | methods        |                      | account of sampling strategy                           | descriptive and no sampling |
| 43 |                |                      |                                                        | strategy used               |
| 44 |                |                      |                                                        |                             |
| 45 |                |                      |                                                        |                             |
| 46 |                |                      |                                                        |                             |
| 47 | Statistical    | <a href="#">#12e</a> | Describe any sensitivity analyses                      | N/A, we used WHO Robson     |
| 48 | methods        |                      |                                                        | implementation manual to    |
| 49 |                |                      |                                                        | assess misclassification    |
| 50 |                |                      |                                                        | among Robson's group        |
| 51 |                |                      |                                                        |                             |
| 52 |                |                      |                                                        |                             |
| 53 |                |                      |                                                        |                             |
| 54 |                |                      |                                                        |                             |

## Results

|    |              |                      |                                                |   |
|----|--------------|----------------------|------------------------------------------------|---|
| 55 | Participants | <a href="#">#13a</a> | Report numbers of individuals at each stage of | 8 |
|----|--------------|----------------------|------------------------------------------------|---|

study—eg numbers potentially eligible, examined for eligibility, confirmed eligible, included in the study, completing follow-up, and analysed. Give information separately for exposed and unexposed groups if applicable.

|    |                  |                                                                                                                                                                                                                                        |                                                     |
|----|------------------|----------------------------------------------------------------------------------------------------------------------------------------------------------------------------------------------------------------------------------------|-----------------------------------------------------|
| 1  |                  |                                                                                                                                                                                                                                        |                                                     |
| 2  |                  |                                                                                                                                                                                                                                        |                                                     |
| 3  |                  |                                                                                                                                                                                                                                        |                                                     |
| 4  |                  |                                                                                                                                                                                                                                        |                                                     |
| 5  |                  |                                                                                                                                                                                                                                        |                                                     |
| 6  |                  |                                                                                                                                                                                                                                        |                                                     |
| 7  |                  |                                                                                                                                                                                                                                        |                                                     |
| 8  |                  |                                                                                                                                                                                                                                        |                                                     |
| 9  |                  |                                                                                                                                                                                                                                        |                                                     |
| 10 | Participants     | <a href="#">#13b</a> Give reasons for non-participation at each stage                                                                                                                                                                  | 8                                                   |
| 11 |                  |                                                                                                                                                                                                                                        |                                                     |
| 12 | Participants     | <a href="#">#13c</a> Consider use of a flow diagram                                                                                                                                                                                    | 8, we used text description instead of flow diagram |
| 13 |                  |                                                                                                                                                                                                                                        |                                                     |
| 14 |                  |                                                                                                                                                                                                                                        |                                                     |
| 15 |                  |                                                                                                                                                                                                                                        |                                                     |
| 16 | Descriptive data | <a href="#">#14a</a> Give characteristics of study participants (eg demographic, clinical, social) and information on exposures and potential confounders. Give information separately for exposed and unexposed groups if applicable. | 8,9                                                 |
| 17 |                  |                                                                                                                                                                                                                                        |                                                     |
| 18 |                  |                                                                                                                                                                                                                                        |                                                     |
| 19 |                  |                                                                                                                                                                                                                                        |                                                     |
| 20 |                  |                                                                                                                                                                                                                                        |                                                     |
| 21 |                  |                                                                                                                                                                                                                                        |                                                     |
| 22 |                  |                                                                                                                                                                                                                                        |                                                     |
| 23 |                  |                                                                                                                                                                                                                                        |                                                     |
| 24 |                  |                                                                                                                                                                                                                                        |                                                     |
| 25 |                  |                                                                                                                                                                                                                                        |                                                     |
| 26 | Descriptive data | <a href="#">#14b</a> Indicate number of participants with missing data for each variable of interest                                                                                                                                   | 9, 10                                               |
| 27 |                  |                                                                                                                                                                                                                                        |                                                     |
| 28 |                  |                                                                                                                                                                                                                                        |                                                     |
| 29 |                  |                                                                                                                                                                                                                                        |                                                     |
| 30 | Outcome data     | <a href="#">#15</a> Report numbers of outcome events or summary measures. Give information separately for exposed and unexposed groups if applicable.                                                                                  | 9, 10, 11                                           |
| 31 |                  |                                                                                                                                                                                                                                        |                                                     |
| 32 |                  |                                                                                                                                                                                                                                        |                                                     |
| 33 |                  |                                                                                                                                                                                                                                        |                                                     |
| 34 |                  |                                                                                                                                                                                                                                        |                                                     |
| 35 |                  |                                                                                                                                                                                                                                        |                                                     |
| 36 | Main results     | <a href="#">#16a</a> Give unadjusted estimates and, if applicable, confounder-adjusted estimates and their precision (eg, 95% confidence interval). Make clear which confounders were adjusted for and why they were included          | N/A, our study was descriptive                      |
| 37 |                  |                                                                                                                                                                                                                                        |                                                     |
| 38 |                  |                                                                                                                                                                                                                                        |                                                     |
| 39 |                  |                                                                                                                                                                                                                                        |                                                     |
| 40 |                  |                                                                                                                                                                                                                                        |                                                     |
| 41 |                  |                                                                                                                                                                                                                                        |                                                     |
| 42 |                  |                                                                                                                                                                                                                                        |                                                     |
| 43 |                  |                                                                                                                                                                                                                                        |                                                     |
| 44 |                  |                                                                                                                                                                                                                                        |                                                     |
| 45 | Main results     | <a href="#">#16b</a> Report category boundaries when continuous variables were categorized                                                                                                                                             | 9,10,11                                             |
| 46 |                  |                                                                                                                                                                                                                                        |                                                     |
| 47 |                  |                                                                                                                                                                                                                                        |                                                     |
| 48 |                  |                                                                                                                                                                                                                                        |                                                     |
| 49 |                  |                                                                                                                                                                                                                                        |                                                     |
| 50 | Main results     | <a href="#">#16c</a> If relevant, consider translating estimates of relative risk into absolute risk for a meaningful time period                                                                                                      | N/A, our study was descriptive                      |
| 51 |                  |                                                                                                                                                                                                                                        |                                                     |
| 52 |                  |                                                                                                                                                                                                                                        |                                                     |
| 53 |                  |                                                                                                                                                                                                                                        |                                                     |
| 54 | Other analyses   | <a href="#">#17</a> Report other analyses done—e.g., analyses of subgroups and interactions, and sensitivity analyses                                                                                                                  | N/A, our study was descriptive                      |
| 55 |                  |                                                                                                                                                                                                                                        |                                                     |
| 56 |                  |                                                                                                                                                                                                                                        |                                                     |
| 57 |                  |                                                                                                                                                                                                                                        |                                                     |
| 58 |                  |                                                                                                                                                                                                                                        |                                                     |
| 59 |                  |                                                                                                                                                                                                                                        |                                                     |
| 60 |                  |                                                                                                                                                                                                                                        |                                                     |

1 **Discussion**

2

3

4 Key results [#18](#) Summarise key results with reference to study 14

5 objectives

6

7

8 Limitations [#19](#) Discuss limitations of the study, taking into account 14

9 sources of potential bias or imprecision. Discuss

10 both direction and magnitude of any potential bias.

11

12

13

14 Interpretation [#20](#) Give a cautious overall interpretation considering 14-18

15 objectives, limitations, multiplicity of analyses,

16 results from similar studies, and other relevant

17 evidence.

18

19

20

21 Generalisability [#21](#) Discuss the generalisability (external validity) of the 14

22 study results

23

24

25 **Other**

26 **Information**

27

28

29

30 Funding [#22](#) Give the source of funding and the role of the 19

31 funders for the present study and, if applicable, for

32 the original study on which the present article is

33 based

34

35

36

37

38

39

40

41

42

43

44

45

46

47

48

49

50

51

52

53

54

55

56

57

58

59

60

# BMJ Open

## Caesarean section rates analysed using Robson's Ten Group Classification System: A cross-sectional study at a tertiary hospital in Ethiopia

|                                 |                                                                                                                                                                                                                                                                                                                                                                                    |
|---------------------------------|------------------------------------------------------------------------------------------------------------------------------------------------------------------------------------------------------------------------------------------------------------------------------------------------------------------------------------------------------------------------------------|
| Journal:                        | <i>BMJ Open</i>                                                                                                                                                                                                                                                                                                                                                                    |
| Manuscript ID                   | bmjopen-2020-039098.R2                                                                                                                                                                                                                                                                                                                                                             |
| Article Type:                   | Original research                                                                                                                                                                                                                                                                                                                                                                  |
| Date Submitted by the Author:   | 07-Oct-2020                                                                                                                                                                                                                                                                                                                                                                        |
| Complete List of Authors:       | Abdo, Abdella; Hawassa University College of Medicine and Health Sciences, Epidemiology<br>Hinderaker , Sven ; University of Bergen Centre for International Health, Center for International Health<br>Tekle, Achamyelesh; Hawassa University College of Medicine and Health Sciences, Public Health<br>Lindtjørn , Bernt ; University of Bergen, Centre for International Health |
| <b>Primary Subject Heading</b>: | Obstetrics and gynaecology                                                                                                                                                                                                                                                                                                                                                         |
| Secondary Subject Heading:      | Public health                                                                                                                                                                                                                                                                                                                                                                      |
| Keywords:                       | PUBLIC HEALTH, Fetal medicine < OBSTETRICS, Maternal medicine < OBSTETRICS, Prenatal diagnosis < OBSTETRICS                                                                                                                                                                                                                                                                        |
|                                 |                                                                                                                                                                                                                                                                                                                                                                                    |

SCHOLARONE™  
Manuscripts



I, the Submitting Author has the right to grant and does grant on behalf of all authors of the Work (as defined in the below author licence), an exclusive licence and/or a non-exclusive licence for contributions from authors who are: i) UK Crown employees; ii) where BMJ has agreed a CC-BY licence shall apply, and/or iii) in accordance with the terms applicable for US Federal Government officers or employees acting as part of their official duties; on a worldwide, perpetual, irrevocable, royalty-free basis to BMJ Publishing Group Ltd ("BMJ") its licensees and where the relevant Journal is co-owned by BMJ to the co-owners of the Journal, to publish the Work in this journal and any other BMJ products and to exploit all rights, as set out in our [licence](#).

The Submitting Author accepts and understands that any supply made under these terms is made by BMJ to the Submitting Author unless you are acting as an employee on behalf of your employer or a postgraduate student of an affiliated institution which is paying any applicable article publishing charge ("APC") for Open Access articles. Where the Submitting Author wishes to make the Work available on an Open Access basis (and intends to pay the relevant APC), the terms of reuse of such Open Access shall be governed by a Creative Commons licence – details of these licences and which [Creative Commons](#) licence will apply to this Work are set out in our licence referred to above.

Other than as permitted in any relevant BMJ Author's Self Archiving Policies, I confirm this Work has not been accepted for publication elsewhere, is not being considered for publication elsewhere and does not duplicate material already published. I confirm all authors consent to publication of this Work and authorise the granting of this licence.

## Caesarean section rates analysed using Robson's Ten Group Classification System: A cross-sectional study at a tertiary hospital in Ethiopia

Abdella Amano Abdo <sup>1,2</sup>, Sven Gudmund Hinderaker (SGH) <sup>2</sup>, Achameyelesh Gebretsedik Tekle (AGT) <sup>1</sup>, Bernt Lindtjorn (BL) <sup>1,2</sup>

<sup>1</sup> School of Public Health, College of Medicine and Health Sciences, Hawassa University, Hawassa, Ethiopia.

<sup>2</sup> Centre for International Health (CIH), University of Bergen, Bergen, Norway

E-mail address of the authors:

AAA: [a2ay.oro@gmail.com](mailto:a2ay.oro@gmail.com), Correspondent author

SGH: [Sven.Hinderaker@uib.no](mailto:Sven.Hinderaker@uib.no)

AGT: [achameyelesh9@yahoo.com](mailto:achameyelesh9@yahoo.com)

BL: [bernt.lindtjorn@uib.no](mailto:bernt.lindtjorn@uib.no)

### Abstract

**Objective:** The aim of this study was to assess the Caesarean section (CS) rates using Robson's Ten-Group Classification System among women who gave birth at Hawassa University Referral Hospital in Southern Ethiopia.

**Design:** Cross-sectional study design to determine CS rate using Robson's Ten-group classification system.

**Setting:** Hawassa University Referral Hospital in South Ethiopia.

**Participants:** 4004 women who gave birth in Hawassa University Referral Hospital from June 2018 to June 2019.

**Results:** The 4004 women gave birth to 4165 babies. The overall CS rate was 32.8% (95% CI: 31.4%, 34.3%). The major contributors to the overall CS rates were: Robson Group 1 (nulliparous women with singleton pregnancy at term in spontaneous labour) 22.9%; Group 5 (multiparous women with at least one previous CS) 21.4%, and Group 3 (multiparous women without previous CS, with singleton pregnancy in spontaneous labour) 17.3%. The most commonly reported indications for CS were "fetal compromise" (35.3%) followed by previous CS (20.3%) and obstructed labour (10.7%).

**Conclusion:** A high proportion of women giving birth at this hospital were given a CS, and many of them were in a low risk group. Few had trial of labour. More active use of partogram, improving fetal heartbeat monitoring system, implementing midwife-led care, involving a companion during labour, and auditing the appropriateness of CS indications may help to reduce the CS rate.



## Strengths and limitations of this study

- It was the first study in Ethiopia that assesses the CS rate using Robson ten group classification system for all labouring mothers in a hospital.
- The study used prospective birth registration, hence the risk of incomplete data minimized
- All women who gave birth in study hospital were included, reducing the risk for selection bias
- Since the study was conducted in single-hospital with high referral and most complicated cases, the finding might be less generalizable.
- The study used birth weight for gestational age determination for some mothers and the possibility of misclassification among the Robson group cannot be ruled out.

## Introduction

Caesarean section (CS) is a life-saving intervention for both the woman and new-born if a complication occurs during late pregnancy and childbirth. It is the most common surgical intervention in many countries (1). The proportion of women giving birth by CS is used by the World Health Organization as an indicator of the provision of lifesaving services for both mothers and newborns (2). WHO suggest that in normal populations CS rates should not exceed 10-15 % (3). However, there is a growing concern about the increasing percentage of CS globally. The CS rates above 15% are not associated with improved maternal and neonatal health (4), and reasons for a CS may be other than medical; in some countries, for example, it may be a cost free option for expecting mothers (5, 6).

CS performed for women who do not need it can have negative consequences for the mothers as well as their babies, especially when the procedure is done in the absence of adequate facilities, skills and comprehensive care (7). Though CS is effective in reducing maternal and neonatal mortality and morbidity, the procedure is also associated with increased maternal risk of infection, bleeding, blood transfusion, hysterectomy, and death compared to normal delivery (8). Indeed, even small operations carry some risks and must be compared with the risks of not undertaking the procedure. A woman who undergoes a CS will have a slightly increased risk for her subsequent babies to have fetal distress, preterm birth, and stillbirth (9-11).

In 2016, globally, the population-based CS rate varied from 6% to 27.2% (12), and the global rate of CS births had doubled over the last 15 years (13). In Ethiopia, the national population-based CS rate had been the lowest in the world (12), (14), but a national review conducted in 2011 covering 797 facilities indicated a CS rate of 15% in public facilities and 46.1% in privately owned facilities (15). The CS rate at a University hospital in eastern Ethiopia was 25.7% (16). Many of these facility-based CS rates represent a selected population of women, and hence not necessarily representing the CS rate in the population.

Though there is no consensus in defining the optimal CS rate at any level due to lack of reliable and internationally accepted classification system, the Ten-Group Classification System created by Robson has now been accepted and used in many countries (17, 18). This system helps

1 institution-specific monitoring and auditing and offers a standardized comparison method for use  
2 between institutions, countries, and time points (19).

3  
4 WHO has been recommending using this system to assess, monitor and compare CS rates since  
5 2015 (2), but it is not yet implemented in Ethiopia. A study on CS was conducted using  
6 Robson's classification system at a university hospital in eastern Ethiopia (16) but was limited to  
7 women who underwent CS, and was not done according to the Robson implementation manual  
8 (20). Therefore, the aim of our study was to determine CS rate using Ten-Group Classification  
9 System among all the women who gave birth at Hawassa University Referral Hospital in  
10 Southern Ethiopia in 2018/2019.  
11  
12  
13  
14  
15  
16  
17  
18

## 19 **Materials and Methods:**

### 20 **Study setting:**

21  
22 The study was conducted at Hawassa University Referral Hospital, which is 275 km to the south  
23 of Addis Ababa, the capital city of Ethiopia. The hospital provides health care services as both  
24 primary health care for Hawassa city and its nearby districts, and as tertiary care services for the  
25 region Southern Nation Nationalities and Peoples, including some neighbouring regions.  
26 Although it provides tertiary care for a population of 15 million, over 90% of the mothers came  
27 from two towns (Shashamane and Hawassa). According to 2019 Ethiopian Mini Demographic  
28 and Health Survey report, 69.4%, 47.6% and 32% of the women had at least one antenatal care  
29 (ANC) follow up, health facility delivery and postnatal care follow up, respectively, in Southern  
30 Nation Nationalities and Peoples region (21). All pregnant women are encouraged to have a  
31 minimum of 4 ANC visit and to deliver at health facilities. Preventive services such as screening  
32 for HIV/AIDS, Syphilis, tetanus toxoid vaccination and iron folate supplementation are routinely  
33 given for pregnant mothers during their ANC follow up. All services related to delivery,  
34 including CS are expected to be given free of charge for delivering mothers at the Hospital. But  
35 sometimes the women are requested to buy drugs, intravenous fluids or gloves, when unavailable  
36 in the hospital dispensary. No payment (in addition to ordinary salary) is given to the obstetrician  
37 for performing CS. Hawassa University Referral Hospital is providing both basic and  
38 comprehensive management of maternal, new-born and child health services for more than 4500  
39 births annually. The hospital is also serving as teaching hospital for health science and medical  
40 students including residency programs. The Department of Obstetrics and Gynaecology had 6  
41 obstetricians and gynaecologists, 80 midwives, as well as its own operation theatre for obstetrics  
42  
43  
44  
45  
46  
47  
48  
49  
50  
51  
52  
53  
54  
55  
56  
57  
58  
59  
60

1 cases. According to national guidelines for staffing, the recommended number of obstetrician  
2 for specialized hospital is 13 and the number at this hospital is less than recommended (22).  
3  
4  
5

## 6 **Study Design and participants**

7  
8 The design was cross-sectional and included all women who gave birth at the hospital between  
9 June 2018 and June 2019. A medical birth registry was adapted from the Kilimanjaro Christian  
10 Medical Centre in Tanzania (23) and used to collect the data.  
11  
12  
13

## 14 **Variables**

15  
16 The main outcome variable was the rate of CS, in all deliveries. Other variables were as follows:  
17 socio-demographic characteristics (maternal age, residence, educational status, occupational  
18 status), maternal characteristics (history of CS and parity), and pregnancy-related information  
19 (gestational age, fetal presentation, number of fetuses and onset of labour). For those women  
20 who underwent CS, information about the indications of CS was also collected.  
21  
22  
23  
24  
25  
26

27 The CS rates were categorised by the Robson classification system shown in Box 1 (20) using  
28 six obstetric parameters: 1) *Fetal lie and presentations* were classified as cephalic, breech or  
29 transverse/oblique. Gestational age was categorised as a term ( $\geq 37$  weeks) or preterm ( $< 37$   
30 weeks). 2) *Gestational age* assessment should ideally be done by early ultrasound. But in our  
31 study, since most of the women did not have early ultrasound measurement, we used the date of  
32 last menstrual period and third trimester ultrasound to assess gestational age. In the case of no  
33 third trimester ultrasound or unknown last menstrual period, a combination of physical  
34 examination, and estimated fetal weight were used for estimation of gestational age. For cases  
35 with undocumented gestational age, we used a birth weight of  $\geq 2500$  grams as a proxy to term  
36 pregnancy. 3) The *onset of labour* was categorised as spontaneous, induced or CS before labour.  
37 4) *Parity* was classified as nulliparous or multiparous. 5) The *number of fetuses* was categorised  
38 as singleton or multiples. 6) History of previous CS was categorised as one, and two or more.  
39  
40  
41  
42  
43  
44  
45  
46

47 Fetal compromise was defined as a fetus having one of the following conditions: fetal distress,  
48 cord prolapse or intra-uterine growth restriction (IUGR). The hospital has one Cardiotocography  
49 (CTG) that was not used. Ultrasound was occasionally used, but in most of the cases the fetal  
50 heartbeat was monitored using fetoscope. We categorised the need for CS as “Absolute  
51 indication” and “Not absolute indication” (24).  
52  
53  
54  
55  
56  
57

**Box 1: Robson's 10-group classification**

| <b>Group</b> | <b>Description</b>                                                                                                             |
|--------------|--------------------------------------------------------------------------------------------------------------------------------|
| 1            | Nulliparous, singleton, cephalic, $\geq 37$ weeks' gestation, in spontaneous labour                                            |
| 2            | Nulliparous, singleton, cephalic, $\geq 37$ weeks' gestation, induced labour or CS before labour                               |
| 2a           | Labour induced                                                                                                                 |
| 2b           | Prelabour CS                                                                                                                   |
| 3            | Multiparous (excluding previous CS), singleton, cephalic, $\geq 37$ weeks' gestation, in spontaneous labour                    |
| 4            | Multiparous without a previous CS, with singleton, cephalic pregnancy, $\geq 37$ weeks' gestation, induced or CS before labour |
| 4a           | Labour induced                                                                                                                 |
| 4b           | Prelabour CS                                                                                                                   |
| 5            | Previous CS, singleton, cephalic, $\geq 37$ weeks' gestation                                                                   |
| 5.1          | With one previous CS                                                                                                           |
| 5.2          | With two or more previous CSs                                                                                                  |
| 6            | All nulliparous with a single breech                                                                                           |
| 7            | All multiparous with a single breech (including previous CS)                                                                   |
| 8            | All multiple pregnancies (including previous CS)                                                                               |
| 9            | All women with a single pregnancy in a transverse or oblique lie (including those with previous CS)                            |
| 10           | All singleton, cephalic, $< 37$ weeks' gestation pregnancies (including CS).                                                   |

Source: WHO. Robson classification. Geneva: WHO, 2017.

**Data collection**

Data were recorded by three midwives in the maternity ward. Data collectors and supervisors were trained and supervised by the Principal Investigator. Information about the socio-demographic characteristics of delivering mothers were collected through interviews at the time of admission if the women were stable or before discharge from the hospital. Information about CS was retrieved from the operation theatre register and double-checked with the midwives' delivery logbook and the admission and discharge registers. Completeness of data were checked by the Principal Investigator.

**Data processing and analysis**

All registered data were double entered using EpiData Version 3.1 (EpiData Association, Odense, Denmark) and consistency were checked and any necessary corrections were made before data analysis. Data were analysed using SPSS Version 25 (IBM, Chicago, IL).

1 Descriptive statistics with frequencies and percentages for categorical data, as well as means and  
2 standard deviation for numerical data were used to summarize the data. The WHO Robson  
3 implementation manual was used to interpret the results of this study (20). For determining CS  
4 rate, we used those mothers with complete data on Robson's group parameters. Those mothers  
5 with missing data were excluded from analysis.  
6  
7  
8  
9

### 10 **Patient and Public involvement**

11  
12 Patients or public were not involved in the design, or conduct, or reporting, or dissemination plan  
13 of our research.  
14  
15  
16  
17  
18  
19  
20  
21  
22  
23  
24  
25  
26  
27  
28  
29  
30  
31  
32  
33  
34  
35  
36  
37  
38  
39  
40  
41  
42  
43  
44  
45  
46  
47  
48  
49  
50  
51  
52  
53  
54  
55  
56  
57  
58  
59  
60

For peer review only

## Results

In the 12-month study period, there were 4031 women coming to give birth at Hawassa University Referral Hospital. Of these clients, 27 had incomplete records and were excluded, resulting in 4004 women giving birth to 4165 babies for analysis. The mean age of the women was 26 years. It ranged from 13 to 45 years. Their sociodemographic characteristics are shown in Table 1. We notice that many were urban dwellers and housewives, and most had some basic formal education.

For peer review only

**Table 1:** Socio-demographic characteristics of women who gave birth at Hawassa University Referral Hospital, Ethiopia, 2018-2019.

| Variables              | Number | Percent (%) |
|------------------------|--------|-------------|
| Total                  | 4004   | 100         |
| Maternal Age (Years)   |        |             |
| <20                    | 187    | 4.7         |
| 20-34                  | 3467   | 86.6        |
| 35 and above           | 347    | 8.7         |
| Not recorded           | 2      | 0.1         |
| Residence              |        |             |
| Urban                  | 3669   | 91.6        |
| Rural                  | 318    | 7.9         |
| Not recorded           | 17     | 0.4         |
| Educational level      |        |             |
| Cannot read and write  | 283    | 7.1         |
| Primary (1-8)          | 1741   | 43.5        |
| Secondary (9-12)       | 1233   | 30.8        |
| College and above      | 715    | 17.9        |
| Not recorded           | 32     | 0.8         |
| Occupational status    |        |             |
| Housewife              | 2834   | 70.8        |
| Merchant               | 307    | 7.7         |
| Employer               | 624    | 15.6        |
| Others*                | 167    | 4.2         |
| Not recorded           | 72     | 1.8         |
| Marital status         |        |             |
| Married                | 3949   | 98.6        |
| Single                 | 29     | 0.7         |
| Divorced/Widowed       | 9      | 0.2         |
| Not recorded           | 17     | 0.4         |
| Referred to give birth |        |             |
| Yes                    | 1468   | 36.7        |
| No                     | 2536   | 63.3        |

\*Daily labourer, student, farmer

The obstetric characteristics of the study participants and the outcomes of the women who gave birth are given in Table 2. Two out of five (41.1%) of the study participants were nulliparous. Almost all of the study participants had had at least one ANC visit during this pregnancy. Of all births, 15.1% were preterm. CS was performed on 1314 (32.8%) women, 165 (12.6%) of them planned. The perinatal mortality was 75 perinatal death/1000 live births was based on deaths occurring in the hospital.



**Table 2:** Obstetrics characteristics of women who gave birth and their outcomes, at Hawassa University Referral Hospital, Ethiopia, 2018-2019

| Variables                            |                        | Number | Percent (%) |
|--------------------------------------|------------------------|--------|-------------|
| Age at first marriage                | 18 years or less       | 1091   | 27.2        |
|                                      | Above 18 years         | 2861   | 71.5        |
|                                      | Not recorded           | 52     | 1.3         |
| Age at first Pregnancy               | 18 years or less       | 748    | 18.7        |
|                                      | Above 18 years         | 3205   | 80.0        |
|                                      | Not recorded           | 50     | 1.3         |
| Parity                               | 0                      | 1646   | 41.1        |
|                                      | 1-4                    | 2185   | 54.6        |
|                                      | >4                     | 173    | 4.3         |
| ANC this pregnancy                   | Yes                    | 3931   | 98.2        |
|                                      | No                     | 57     | 1.4         |
|                                      | Not recorded           | 16     | 0.4         |
| Gestational Age                      | Pre-term (<37 weeks)   | 606    | 15.1        |
|                                      | Term (37-42 weeks)     | 3253   | 81.2        |
|                                      | Post-term (>42 weeks)  | 145    | 3.6         |
| Onset of labour                      | Induced                | 398    | 9.9         |
|                                      | Spontaneous            | 3441   | 85.9        |
|                                      | Pre-labour CS          | 165    | 4.2         |
| Fetal lie and presentation           | Cephalic               | 3844   | 96.0        |
|                                      | Breech                 | 143    | 3.6         |
|                                      | Transverse/Oblique     | 17     | 0.4         |
| Mode of Delivery                     | Spont.Vaginal Delivery | 2605   | 65.1        |
|                                      | Instrumental delivery  | 85     | 2.1         |
|                                      | CS                     | 1314   | 32.8        |
|                                      | CS emergency           | 1149   | 87.4        |
|                                      | CS planned             | 165    | 12.6        |
| Number of fetus at birth<br>(n=4165) | Singleton              | 3850   | 92.4        |
|                                      | Multiple               | 315    | 7.6         |

|                         |                         |              |      |      |
|-------------------------|-------------------------|--------------|------|------|
| Type of multiple births | Twin                    | 292          | 92.7 |      |
| (n=315)                 | Triplets                | 19           | 6.0  |      |
|                         | Quadruplets             | 4            | 1.3  |      |
|                         | Birth Weight (in grams) | <2500        | 592  | 14.2 |
| (n=4165)                |                         | 2500-4000    | 3355 | 80.6 |
|                         |                         | >4000        | 188  | 4.5  |
|                         |                         | Not recorded | 30   | 0.7  |
| Previous CS (n=2358)    | Yes                     | 438          | 18.6 |      |
|                         | No                      | 1920         | 81.4 |      |

Instrumental delivery includes; vacuum and forceps delivery. ANC- antenatal clinic visit, CS caesarean section

### Robson Ten Group Classification System

Table 3 shows the women who gave birth according to Robson classification. We notice that the groups most represented by type of obstetrics population (group size) were: multiparous women without previous CS; women with a singleton pregnancy in spontaneous labour (group 3); nulliparous women with singleton pregnancy in spontaneous labour (group 1); and women with pre-term birth (group 10).

The overall CS rate in this study was 32.8% (95% CI: 31.4%, 34.3%). The major contributors to the overall CS rate were: Group 1 (nulliparous women with singleton pregnancy in spontaneous labour), group 5 (multiparous women with at least one previous CS) and group 3 (multiparous women without previous CS, with singleton pregnancy in spontaneous labour) (Table 3).

From an obstetrician's perspective, the most common indications for CS were fetal compromise, obstructed labour and previous CS (Figure 1: Indications for performing caesarean section (CS) among women who gave birth at Hawassa University Referral Hospital, Ethiopia, 2018-2019). In this study, 227/1314 (17.3%) CS were performed for absolute maternal indications. For non-absolute indications, CS was performed in 968/1314 (73.7%) of cases, mainly non-reassuring fetal heartbeat pattern (fetal distress). The remaining 9.0% of CS could not be classified in this way, and included post-term pregnancy, premature rupture of membrane, multiple pregnancies, and polyhydramnios/oligohydramnios.

**Table 3.** Robson's Classification system among women who gave birth at Hawassa University Referral Hospital, Hawassa, South Ethiopia, 2018-2019

| Robson Group                                                                                           | CS in Group | Number in Group | Group size (%) | CS in group (%) | Absolute group contribution to overall CS rate (%) | Relative contribution of the group to the overall CS rate (%) |
|--------------------------------------------------------------------------------------------------------|-------------|-----------------|----------------|-----------------|----------------------------------------------------|---------------------------------------------------------------|
| <b>Group 1</b> (nulliparous with singleton pregnancy in spontaneous labour)                            | 301         | 1094            | 27.3           | 27.5            | 7.5                                                | 22.9                                                          |
| <b>Group 2</b> (nulliparous women with singleton pregnancy who had induced labour or pre-labour CS)    | 97          | 227             | 5.7            | 42.7            | 2.4                                                | 7.4                                                           |
| <b>Group 2a</b> (induced labour)                                                                       | 55          | 185             | 4.6            | 29.7            | 1.4                                                | 4.2                                                           |
| <b>Group 2b</b> (pre-labour CS)                                                                        | 42          | 42              | 1.1            | 100.0           | 1.0                                                | 3.2                                                           |
| <b>Group 3</b> (multiparous women without previous CS, with singleton pregnancy in spontaneous labour) | 227         | 1356            | 33.9           | 16.7            | 5.7                                                | 17.3                                                          |
| <b>Group 4</b> (multiparous without previous CS, singleton with induced labour or pre-labour CS)       | 68          | 158             | 3.9            | 43.0            | 1.7                                                | 5.2                                                           |
| <b>Group 4a</b> (induced labour)                                                                       | 33          | 123             | 3.1            | 26.8            | 0.8                                                | 2.5                                                           |
| <b>Group 4b</b> (pre-labour CS)                                                                        | 35          | 35              | 0.8            | 100.0           | 0.9                                                | 2.7                                                           |

|                                                                  |             |             |               |             |             |               |
|------------------------------------------------------------------|-------------|-------------|---------------|-------------|-------------|---------------|
| <b>Group 5</b> (multiparous women with at least one previous CS) | 281         | 362         | 9.0           | 77.6        | 7.0         | 21.4          |
| <b>Group 5.1</b> (one previous CS)                               | 214         | 290         | 7.2           | 73.8        | 5.3         | 16.3          |
| <b>Group 5.2</b> (two or more previous CS)                       | 57          | 72          | 1.8           | 79.2        | 1.4         | 4.3           |
| <b>Group 6</b> (nulliparous women with singleton breech)         | 38          | 46          | 1.2           | 82.6        | 0.9         | 2.9           |
| <b>Group 7</b> (multiparous women with singleton breech)         | 58          | 65          | 1.6           | 89.2        | 1.4         | 4.4           |
| <b>Group 8</b> (all multiple pregnancies)                        | 91          | 154         | 3.9           | 59.1        | 2.3         | 6.9           |
| <b>Group 9</b> (all women with transverse or oblique lie)        | 16          | 16          | 0.4           | 100.0       | 0.4         | 1.2           |
| <b>Group 10</b> (all women with pre-term delivery)               | 137         | 526         | 13.1          | 26.0        | 3.4         | 10.4          |
| <b>Total</b>                                                     | <b>1314</b> | <b>4004</b> | <b>100.00</b> | <b>32.8</b> | <b>32.8</b> | <b>100.00</b> |

Group size (%) = n of women in the group/total number of women who gave birth in the hospital × 100.

Group CS rate (%) = n of CS in the group/total number of women in the group × 100.

Absolute contribution (%) = n of CS in the group/total number of women who gave birth in the hospital × 100.

Relative contribution (%) = n of CS in the group/total number of CS in the hospital × 100.

## 1 Discussion

2 A high proportion of women who gave birth in Hawassa University Referral Hospital were  
3 through CS, almost a third. The major contributors to the overall CS rate were group 1  
4 (nulliparous with singleton pregnancy in spontaneous labour), group 5 (multiparous  
5 women with at least one previous CS) and group 3 (multiparous women without previous  
6 CS, with singleton pregnancy in spontaneous labour). The most commonly reported  
7 indications for CS were a fetal compromise, previous CS and obstructed labour.

8 In this study we interpreted the findings based on Robson's implementation manual (20):  
9 thus, we assessed the quality of the data, the population attending the services (shown in  
10 Appendix 1), and we analysed the proportion of CS in each group (shown in Appendix 2).

11 Our study had several strengths. To our knowledge, this study is the first study at a major  
12 hospital in Ethiopia that assessed the CS rate using Robson's Ten Group Classification System  
13 for all labouring mothers. The birth registration was prospective and consecutive; hence the risk  
14 of incomplete data were minimized. All women who gave birth in the hospital during the study  
15 were included and this may have reduced selection bias.

16 The study also had some weaknesses. The study was conducted in a single hospital, and since it  
17 is a referral hospital, the selection of participants may be biased to some degree, and for this  
18 reason the findings might be less generalizable. However, standardization according to Robson is  
19 able to be used in such situations. Its use permits valid and useful comparisons to be done even at  
20 different levels of care. Another weakness is that the study used birth weight to determine  
21 gestational age for some mothers, and this could lead to a misclassification of some births into a  
22 wrong Robson group. We assessed whether this results in misclassification among Robson group  
23 according to WHO Robson implementation manual and the risk of misclassification was minimal.  
24 A third potential weakness involved inconsistent use of partogram and fetal heartbeat. This makes  
25 the criteria for decisions and indications for CS unclear and left much up to individual doctor's  
26 discretion.

27 The manual for interpretation of CS rates stated that the size of group 9 (women with  
28 *transverse lie*, singletons pregnancy), should be less than 1% of the total and the CS rate

1 should be 100% for this group (20). In our study, the size of group 9 was 0.4% and the CS  
2 rate in this group was 100%, suggesting minimal misclassification in this group, and the  
3 size of group 9 was similar to other studies (20, 25, 26)

4 In our study several indicators were in line with the comparison populations given in  
5 Robson's manual; the proportion of women with *breech* pregnancy (group 6 and 7), the  
6 ratio of the size of group 1 (nulliparous women with singleton pregnancy in *spontaneous*  
7 *labour*) and group 2 (nulliparous women with singleton pregnancy, who had induced  
8 labour or *pre-labour CS*), as well as the ratio of the size of group 3 (multiparous women  
9 without *previous CS*, with singleton pregnancy in *spontaneous labour*) and group 4  
10 (multiparous women without *previous CS*, with singleton pregnancy, who had induced  
11 labour or *pre-labour CS*) (20, 25, 26). However, the proportion of group 1 (*nulliparous*  
12 women with singleton pregnancy in *spontaneous labour*) and group 2 (*nulliparous* women  
13 with singleton pregnancy, who had induced labour or *pre-labour CS*) was slightly lower  
14 than the comparison populations (20, 25, 26). This may be due to the low proportions of  
15 nulliparous women in our study. The proportion of group 3 (*multiparous* women without  
16 previous CS, with singleton pregnancy in *spontaneous labour*) and group 4 (*multiparous*  
17 women without previous CS, with singleton pregnancy, who had induced labour or *pre-*  
18 *labour CS*) was higher than the Robson reference population (20). This may be explained  
19 by the fact that we had a high proportion of multiparous women in our study populations.  
20 According to Robson, the proportion of group 5 (multiparous women with at least one  
21 *previous CS*) should, be about half of all the CS. In our study, the proportion of group 5  
22 represents less than 10% of the total women delivered in the hospital, which may reflect a  
23 low CS rate in previous years. The proportion of group 8 (women with multiple  
24 pregnancies) and group 10 (women with preterm pregnancy) in our study was similar with  
25 the comparison population (20, 25, 26).

26 The CS rate in Robson group 1 (*nulliparous* women with singleton pregnancy in  
27 *spontaneous labour*) was 27.5%, which is much higher than Robson's examples showing  
28 that rates under 10% are achievable (20). This may reflect a selection among nullipara,  
29 where many normal spontaneous deliveries take place at lower health facilities (health  
30 centres and primary hospitals), and those who attend this referral hospital are selected,

1 either referred or they decided themselves for unknown reasons to attend the hospital.

2 Alternatively, it may reflect a low “threshold” interpreting criterion for a CS.

3 The CS rate in group 2 (*nulliparous* women with singleton pregnancy, who had labour  
4 induced or *pre-labour CS*) was similar to the comparison populations (25, 26), but higher  
5 than Robson's guideline (CS rate between 20-35) (20). This may reflect that the threshold  
6 for deciding on doing CS is too low, and this may happen at extremely busy labour wards;  
7 for example, the ward is so busy that calling a doctor and suggesting a CS in a case of slow  
8 progress may be preferred to a time-consuming trial of labour. This “low” CS threshold  
9 may explain why group 3 (*multiparous* women without previous CS, with singleton  
10 pregnancy in spontaneous labour) also had a higher CS rate (17%) than the comparisons  
11 (3-5%) (20, 25, 26). It could also be partly due to some misclassification by including  
12 women from group 5 (*multiparous* women with at least one *previous CS*) in group 3, but  
13 this is less likely.

14 Robson guideline stated that the CS rate in group 4 (*multiparous* women without a previous CS,  
15 with singleton pregnancy, who had induced labour or *pre-labour CS*) is rarely should be higher  
16 than 15%, while in our study this rate was much higher (43%). This may be because of the high  
17 CS rate in women who underwent induction of labour (group 4a) (26.8%), which contributed to  
18 the high overall CS rate in group 4. Also, it may partly be due to a high proportion of failed  
19 inductions, or possible misclassifications by including group 5 (*multiparous* women with at least  
20 one *previous CS*) in group 4.

21  
22 The CS rate in group 5 (*multiparous* women with at least one *previous CS*) in our study was  
23 77.6%, which is higher than the Robson guideline (50-60%) (20). This indicates that in our  
24 study, too few women were offered a trial of labour after having had previous CS.

25  
26 The CS rate for breech in group 6 (*nulliparous* women with singleton *breech* pregnancy) and  
27 group 7 (*multiparous* women with a singleton *breech* pregnancy including previous CS) in our  
28 study was similar to comparison populations (20, 25, 26).

29

1  
2  
3 1 The examples given by Robson in his guideline stated that nullipara and women with a previous  
4 2 CS contribute to 66% of CS at the hospital, comprising group 1 (*nulliparous* women with  
5 3 singleton pregnancy in *spontaneous labour*), group 2 (*nulliparas* women with singleton  
6 4 pregnancy, who had induced labour or *pre-labour CS*) and group 5 (*multiparous* women with at  
7 5 least one *previous CS*) (20). In our study, the relative contribution of these three groups (1,2,5) to  
8 6 the overall CS rate was 51.7%. This difference may be that the study area had few nullipara with  
9 7 planned CS, as seen in the low relative contribution of group 2 (*nulliparas* women with singleton  
10 8 pregnancy, who had induced labour or *pre-labour CS*) to the overall CS rate which in our study  
11 9 was (7.38%).  
12  
13  
14  
15  
16  
17  
18  
19

20 10  
21 11 The overall CS rate in our hospital (32.8%) is higher than the WHO recommendation 10-15%  
22 12 (3). The high CS rate in our study may be due to several issues. One probable factor could be  
23 13 that the hospital is a referral hospital where more than a third of women referred to this hospital  
24 14 with different emergency situations that may need emergency management through CS delivery.  
25 15 Another factor could be that Hawassa University referral hospital as a teaching hospital has  
26 16 doctors under specialist training performing CS without following strict indications for  
27 17 performing CS. In our study hospital, there is no one-to-one midwifery-led care, and this may  
28 18 also be a possible reason for the high caesarean section rate in our study. Several studies have  
29 19 shown midwifery-led care to significantly reduce caesarean section rate (27-31). In addition,  
30 20 there was no support of companion during labour in our hospital, and several studies showed that  
31 21 support from a companion during labour and childbirth reduced caesarean section rate and  
32 22 improved maternal and newborn birth outcomes (32-34). Another possible driving factors for  
33 23 this high CS rate could be the hospital is a referral hospital where more than a third of women  
34 24 referred to this hospital with different emergency situations that may need emergency  
35 25 management through CS delivery (35). Nearly three-quarters (73.7%) of CS in this study was  
36 26 performed for non-absolute maternal indications, mainly fetal distress, and CS may be performed  
37 27 for some women without clear appropriate indications. Fetal monitoring was not optimal, and  
38 28 this may have contributed to the high prevalence of “fetal distress”. Also, a large proportion were  
39 29 urban women (91.6%) who gave birth in the hospital, and urban women are shown to have  
40 30 higher CS rates than the rural women in other settings also (36-38).  
41  
42  
43  
44  
45  
46  
47  
48  
49  
50  
51  
52  
53  
54  
55  
56  
57  
58  
59  
60



1  
2  
3 1 Our study showed that Robson group 1 (*nulliparous* women with singleton pregnancy in  
4 2 *spontaneous labour*), group 5 (multiparous women with at least one *previous CS*) and  
5 3 group 3 (*multiparous* women without previous CS, with singleton pregnancy in  
6 4 *spontaneous labour*) were the major contributors to the overall CS rate. These same groups  
7 5 were the major contributors in the eastern Ethiopia and elsewhere (16, 39-44), though the  
8 6 order was different. The difference in the order of these groups among the studies may  
9 7 because of the variation in study populations and overall CS rate (20). The high contribution  
10 8 of emergency CS in nullipara (group 1, nulliparous women with singleton pregnancy in  
11 9 spontaneous labour) in our study may be related to inappropriate indications of CS delivery  
12 10 in this group in our study hospital. More than one third (35%) of CS performed in this  
13 11 group is due to abnormal fetal heartbeat patterns. This was high, indicating the possibility  
14 12 of misdiagnosis of abnormal fetal heartbeat pattern. A more active use of the partogram as  
15 13 a tool for decision-making would help clinicians and midwives decide more consistently,  
16 14 instead of relying on too heavily health care workers individual assessment in a busy ward.

17 15 The most commonly reported indications for CS were fetal compromise, previous CS and  
18 16 obstructed labour; similar indications have been reported from eastern Ethiopia (16) and  
19 17 elsewhere in Africa, Asia and Australia (42, 44-47).

20 18 In conclusion, this study has shown a high overall CS rate at Hawassa University Referral  
21 19 Hospital. Nulliparous women with singleton pregnancy in spontaneous labour (group 1),  
22 20 multiparous women with at least one previous CS (group 5) and multiparous women  
23 21 without previous CS, with singleton pregnancy, in spontaneous labour (group 3) were the  
24 22 major contributors to the overall high CS rates. Fetal compromise, previous CS and  
25 23 obstructed labour were the major indications for performing CS. There was a high CS rate  
26 24 in low-risk groups (group 1 and 3). We recommend that all labouring women be regularly  
27 25 followed with partogram, and that they be given the opportunity for instrumental delivery  
28 26 to decrease the use of primary CS among low risk groups. Fetal heartbeat monitoring  
29 27 system should be improved to reduce unnecessary CS that could be done due to  
30 28 misdiagnosis of fetal distress. The implementation of midwife-led care and involvement of  
31 29 a companion during labour and childbirth should also be considered. The reasons for the  
32 30 high CS rate among low-risk groups should be explored and the appropriateness of CS

1  
2  
3 1 should be evaluated to reduce the overall CS rate, which benefits the health system, in  
4  
5 2 general.  
6  
7

8 3

9  
10 4

11  
12 5 **Author affiliations:**

13  
14  
15 6 <sup>1</sup> School of Public Health, College of Medicine and Health Sciences, Hawassa University,  
16  
17 7 Hawassa, Ethiopia.

18  
19  
20 8 <sup>2</sup> Centre for International Health (CIH), University of Bergen, Bergen, Norway  
21  
22 9

23 10 **Acknowledgements:**

24  
25 11 We would like to thank Hawassa University Referral Hospital management and the Head of its  
26  
27 12 Obstetrics Ward for creating a conducive environment in order to accomplish this research. We  
28  
29 13 want to extend our thanks to NORHED-SENUPH project for financial support.  
30  
31 14

32 15 **Author Contributions:**

33  
34 16 AAA and BL conceived the study and analysed the data. AAA wrote the proposal and the first  
35  
36 17 draft of the manuscript. SGH, AGT, and BL supervised and provided mentorship. All authors  
37  
38 18 contributed to the writing and reviewed the article and approved the final version of the  
39  
40 19 manuscript.

41 20 **Patient consent:** Written consent was obtained from all delivering mothers to participate in this  
42  
43 21 study. The interview was conducted at a convenient time for the women; before delivery and  
44  
45 22 after delivery before discharge from the hospital, and no woman declined to participate in the  
46  
47 23 study. Written consent was obtained from illiterate women after data collectors read information  
48  
49 24 described in the consent form in the language they can understand. After they agreed on the  
50  
51 25 information read for them, they signed on the consent form by using their thumb stump  
52  
53 26 (fingerprint).

54  
55  
56  
57  
58  
59 27 The consent was made according to ethical principles of “autonomy” by including statements  
60

1  
2  
3 1 that give participants the right to decline participation in the study at any time. The consent also  
4  
5 2 included statements of potential risk, benefits and confidentiality.  
6  
7 3

8 4 **Ethics approval:** This study was approved by Hawassa University College of Medicine and  
9  
10 5 Health Sciences Institutional Review Board (ref.no.IRB/007/10), and Regional Ethical  
11  
12 6 Committee (Rek Vest) (ref.no.2018/595) in Norway.  
13  
14 7

15 8 **Funding:** Financial support was obtained from NORHED through the SENUPH (Southern  
16  
17 9 Ethiopia Network of University in Public Health) project (ETH-13/0025).  
18

19 10 **Disclaimer:** The funding organisation has no role in the design, execution or decision to publish  
20  
21 11 the study.

22 12 **Competing interests:** None declared  
23

24 13 **Data sharing statement:** Data are available upon reasonable request  
25  
26  
27  
28  
29  
30  
31  
32  
33  
34  
35  
36  
37  
38  
39  
40  
41  
42  
43  
44  
45  
46  
47  
48  
49  
50  
51  
52  
53  
54  
55  
56  
57  
58  
59  
60

## References

1. Biccadd BM, Madiba TE, Kluys HL, Munlemvo DM, Madzimbamuto FD, Basenero A, et al. Perioperative patient outcomes in the African Surgical Outcomes Study: a 7-day prospective observational cohort study. *Lancet (London, England)*. 2018;391(10130):1589-98.
2. WHO Statement on caesarean section rates. *Reprod Health Matters*. 2015;23(45):149-50.
3. WHO. Appropriate technology for birth. *Lancet (London, England)*. 1985;2(8452):436-7.
4. Betran AP, Torloni MR, Zhang J, Ye J, Mikolajczyk R, Deneux-Tharaux C, et al. What is the optimal rate of caesarean section at population level? A systematic review of ecologic studies. *Reproductive health*. 2015;12:57.
5. Federal Ministry of Health. Implementation manual for health care financing reports; 2010. Addis Ababa, Ethiopia.
6. Witter S, Boukhalfa C, Cresswell JA, Daou Z, Filippi V, Ganaba R, et al. Cost and impact of policies to remove and reduce fees for obstetric care in Benin, Burkina Faso, Mali and Morocco. *Int J Equity Health*. 2016;15(1):123.
7. Souza JP, Gulmezoglu A, Lumbiganon P, Laopaiboon M, Carroli G, Fawole B, et al. Caesarean section without medical indications is associated with an increased risk of adverse short-term maternal outcomes: the 2004-2008 WHO Global Survey on Maternal and Perinatal Health. *BMC Med*. 2010;8:71.
8. Villar J, Carroli G, Zavaleta N, Donner A, Wojdyla D, Faundes A, et al. Maternal and neonatal individual risks and benefits associated with caesarean delivery: multicentre prospective study. *BMJ (Clinical research ed)*. 2007;335(7628):1025.
9. Zhang Y, Zhou J, Ma Y, Liu L, Xia Q, Fan D, et al. Mode of delivery and preterm birth in subsequent births: A systematic review and meta-analysis. *PloS one*. 2019;14(3):e0213784.
10. Kok N, Ruiter L, Hof M, Ravelli A, Mol BW, Pajkrt E, et al. Risk of maternal and neonatal complications in subsequent pregnancy after planned caesarean section in a first birth, compared with emergency caesarean section: a nationwide comparative cohort study. *BJOG : an international journal of obstetrics and gynaecology*. 2014;121(2):216-23.
11. Huang X, Lei J, Tan H, Walker M, Zhou J, Wen SW. Cesarean delivery for first pregnancy and neonatal morbidity and mortality in second pregnancy. *European journal of obstetrics, gynecology, and reproductive biology*. 2011;158(2):204-8.
12. Betran AP, Ye J, Moller AB, Zhang J, Gulmezoglu AM, Torloni MR. The Increasing Trend in Caesarean Section Rates: Global, Regional and National Estimates: 1990-2014. *PloS one*. 2016;11(2):e0148343.
13. Boerma T, Ronsmans C, Melesse DY, Barros AJD, Barros FC, Juan L, et al. Global epidemiology of use of and disparities in caesarean sections. *Lancet (London, England)*. 2018;392(10155):1341-8.
14. Central Statistical Agency (CSA) [Ethiopia] and ICF. Ethiopia Demographic and Health Survey 2016. Addis Ababa, Ethiopia, and Rockville, Maryland, USA. Ethiopia Demographic and Health Survey: CSA and ICF, 2016.
15. Fesseha N, Getachew A, Hiluf M, Gebrehiwot Y, Bailey P. A national review of cesarean delivery in Ethiopia. *International journal of gynaecology and obstetrics: the official organ of the International Federation of Gynaecology and Obstetrics*. 2011;115(1):106-11.
16. Tura AK, Pijpers O, de Man M, Cleveringa M, Koopmans I, Gure T, et al. Analysis of caesarean sections using Robson 10-group classification system in a university hospital in eastern Ethiopia: a cross-sectional study. *BMJ open*. 2018;8(4):e020520.
17. Torloni MR, Betran AP, Souza JP, Widmer M, Allen T, Gulmezoglu M, et al. Classifications for cesarean section: a systematic review. *PloS one*. 2011;6(1):e14566.

18. Betran AP, Vindevoghel N, Souza JP, Gulmezoglu AM, Torloni MR. A systematic review of the Robson classification for caesarean section: what works, doesn't work and how to improve it. *PLoS one*. 2014;9(6):e97769.
19. Robson M. The Ten Group Classification System (TGCS) - a common starting point for more detailed analysis. *BJOG : an international journal of obstetrics and gynaecology*. 2015;122(5):701.
20. Robson Classification: Implementation Manual. Geneva: World Health Organization; 2017. Licence: CC BY-NC-SA 3.0 IGO. .
21. Ethiopian Public Health Institute (EPHI) [Ethiopia] and ICF. 2019. Ethiopia Mini Demographic and Health Survey 2019: Key Indicators. Rockville, Maryland, USA: EPHI and ICF.
22. Federal Ministry of Health. National Health Workforce Update. Human Resource Development Directorate Bulletin 2nd Edition. 2019. Addis Ababa, Ethiopia.
23. Per Bergsjø, Joseph Mlay, Olola Oneko, Shao J. Instructions manual for Registration of deliveries at the KCMC Birth Registry, Revised Edition: Department of Obstetrics and Gynecology KCMC Moshi, Tanzania and Department of Public Health and Primary Health Care University of Bergen Bergen, Norway, 2010.
24. Stanton C, Ronsmans C. Recommendations for routine reporting on indications for cesarean delivery in developing countries. *Birth (Berkeley, Calif)*. 2008;35(3):204-11.
25. Senanayake H, Piccoli M, Valente EP, Businelli C, Mohamed R, Fernando R, et al. Implementation of the WHO manual for Robson classification: an example from Sri Lanka using a local database for developing quality improvement recommendations. *BMJ open*. 2019;9(2):e027317.
26. Souza JP, Betran AP, Dumont A, de Mucio B, Gibbs Pickens CM, Deneux-Tharaux C, et al. A global reference for caesarean section rates (C-Model): a multicountry cross-sectional study. *BJOG : an international journal of obstetrics and gynaecology*. 2016;123(3):427-36.
27. Bartuseviciene E, Kacerauskiene J, Bartusevicius A, Paulionyte M, Nadisauskiene RJ, Kliucinskas M, et al. Comparison of midwife-led and obstetrician-led care in Lithuania: A retrospective cohort study. *Midwifery*. 2018;65:67-71.
28. Jiang XM, Chen QY, Guo SB, Jin LZ, Huang XX, Liu XW, et al. Effect of midwife-led care on birth outcomes of primiparas. *Int J Nurs Pract*. 2018;24(6):e12686.
29. McLachlan HL, Forster DA, Davey MA, Farrell T, Gold L, Biro MA, et al. Effects of continuity of care by a primary midwife (caseload midwifery) on caesarean section rates in women of low obstetric risk: the COSMOS randomised controlled trial. *BJOG : an international journal of obstetrics and gynaecology*. 2012;119(12):1483-92.
30. Sandall J, Devane D, Soltani H, Hatem M, Gates S. Improving quality and safety in maternity care: the contribution of midwife-led care. *J Midwifery Womens Health*. 2010;55(3):255-61.
31. Tracy SK, Hartz DL, Tracy MB, Allen J, Forti A, Hall B, et al. Caseload midwifery care versus standard maternity care for women of any risk: M@NGO, a randomised controlled trial. *Lancet (London, England)*. 2013;382(9906):1723-32.
32. Bohren MA, Hofmeyr GJ, Sakala C, Fukuzawa RK, Cuthbert A. Continuous support for women during childbirth. *The Cochrane database of systematic reviews*. 2017;7(7):Cd003766.
33. Hodnett ED, Gates S, Hofmeyr GJ, Sakala C. Continuous support for women during childbirth. *The Cochrane database of systematic reviews*. 2012;10:Cd003766.
34. Kadour-Peero E, Miller N, Vitner D, Bleicher I, Said S, Dashkovsky M, et al. Who may accompany the parturient to the delivery room? *Arch Gynecol Obstet*. 2019;300(2):293-7.
35. Sørbye IK, Vangen S, Oneko O, Sundby J, Bergsjø P. Caesarean section among referred and self-referred birthing women: a cohort study from a tertiary hospital, northeastern Tanzania. *BMC pregnancy and childbirth*. 2011;11:55.

- 1
  - 2
  - 3
  - 4
  - 5
  - 6
  - 7
  - 8
  - 9
  - 10
  - 11
  - 12
  - 13
  - 14
  - 15
  - 16
  - 17
  - 18
  - 19
  - 20
  - 21
  - 22
  - 23
  - 24
  - 25
  - 26
  - 27
  - 28
  - 29
  - 30
  - 31
  - 32
  - 33
  - 34
  - 35
  - 36
  - 37
  - 38
  - 39
  - 40
  - 41
  - 42
  - 43
  - 44
  - 45
  - 46
  - 47
  - 48
  - 49
  - 50
  - 51
  - 52
  - 53
  - 54
  - 55
  - 56
  - 57
  - 58
  - 59
  - 60
36. Amjad A, Amjad U, Zakar R, Usman A, Zakar MZ, Fischer F. Factors associated with caesarean deliveries among child-bearing women in Pakistan: secondary analysis of data from the Demographic and Health Survey, 2012-13. *BMC pregnancy and childbirth*. 2018;18(1):113.
37. Azene AG, Aragaw AM, Birlie MG. Multilevel modelling of factors associated with caesarean section in Ethiopia: community based cross sectional study. *BMC research notes*. 2019;12(1):724.
38. de Loenzien M, Schantz C, Luu BN, Dumont A. Magnitude and correlates of caesarean section in urban and rural areas: A multivariate study in Vietnam. *PloS one*. 2019;14(7):e0213129.
39. Abdel-Aleem H, Shaaban OM, Hassanin AI, Ibraheem AA. Analysis of cesarean delivery at Assiut University Hospital using the Ten Group Classification System. *International journal of gynaecology and obstetrics: the official organ of the International Federation of Gynaecology and Obstetrics*. 2013;123(2):119-23.
40. Costa ML, Cecatti JG, Souza JP, Milanez HM, Gulmezoglu MA. Using a Caesarean Section Classification System based on characteristics of the population as a way of monitoring obstetric practice. *Reproductive health*. 2010;7:13.
41. Litorp H, Kidanto HL, Nystrom L, Darj E, Essen B. Increasing caesarean section rates among low-risk groups: a panel study classifying deliveries according to Robson at a university hospital in Tanzania. *BMC pregnancy and childbirth*. 2013;13:107.
42. Tapia V, Betran AP, Gonzales GF. Caesarean Section in Peru: Analysis of Trends Using the Robson Classification System. *PloS one*. 2016;11(2):e0148138.
43. Yadav RG, Maitra N. Examining Cesarean Delivery Rates Using the Robson's Ten-group Classification. *J Obstet Gynaecol India*. 2016;66(Suppl 1):1-6.
44. Tognon F, Borghero A, Putoto G, Maziku D, Torelli GF, Azzimonti G, et al. Analysis of caesarean section and neonatal outcome using the Robson classification in a rural district hospital in Tanzania: an observational retrospective study. *BMJ open*. 2019;9(12):e033348.
45. Begum T, Nababan H, Rahman A, Islam MR, Adams A, Anwar I. Monitoring caesarean births using the Robson ten group classification system: A cross-sectional survey of private for-profit facilities in urban Bangladesh. *PloS one*. 2019;14(8):e0220693.
46. Makhanya V, Govender L, Moodley J. Utility of the Robson Ten Group Classification System to determine appropriateness of caesarean section at a rural regional hospital in KwaZulu-Natal, South Africa. *SAMJ*. 2015;105(4):292-5.
47. Tanaka K, Mahomed K. The Ten-Group Robson Classification: A Single Centre Approach Identifying Strategies to Optimise Caesarean Section Rates. *Obstet Gynecol Int*. 2017;2017:5648938.

## LEGENDS

**Figure 1.** Indications for performing caesarean section (CS) among women who gave birth at Hawassa University Referral Hospital, Ethiopia, 2018-2019)

**Box 1.** Robson's 10-group classification

**Table 1.** Socio-demographic characteristics of women who gave birth at Hawassa University Referral Hospital, Ethiopia, 2018-2019.

**Table 2.** Obstetrics characteristics of women who gave birth and their outcomes, at Hawassa University Referral Hospital, Ethiopia, 2018-2019

**Table 3.** Robson's Classification system among women who gave birth at Hawassa University Referral Hospital, Hawassa, South Ethiopia, 2018-2019



**Figure 1.** Indications for performing caesarean section (CS) among women who gave birth at Hawassa University Referral Hospital, Ethiopia, 2018-2019.

Foetal compromise = Foetal distress, cord prolapse, and intrauterine growth restriction. Failure to progress = Prolonged labour, cervical arrest, and failed induction. Obstructed labour = Cephalopelvic disproportion, macrosomia, and unspecified disproportions. Malpresentation = Transverse, oblique or brow. Others = Post term pregnancy, premature rupture of membrane, multiple pregnancies and polyhydramnios/oligohydramnios. APH, antepartum haemorrhage.



**Appendix 1:** Assessment of the type of Populations among women who gave birth at Hawassa University Referral Hospital, Hawassa, South Ethiopia.

| <b>Steps for Interpretation</b>   | <b>Interpretation by Robson</b> | <b>Example: MCS Population</b> | <b>Sri Lanka study</b> | <b>Our finding</b> | <b>Additional information from the data</b> | <b>Final Interpretation</b>                                                                                                                                                                                                                                                                                       |
|-----------------------------------|---------------------------------|--------------------------------|------------------------|--------------------|---------------------------------------------|-------------------------------------------------------------------------------------------------------------------------------------------------------------------------------------------------------------------------------------------------------------------------------------------------------------------|
| <b>Step 1:</b> Size of group 1+ 2 | 35-42%                          | 38.1%                          | 38.1%                  | 32.99%             | Nulliparas in our population 41.1%          | Rate is lower than all the three references by Robson, MCS and Sri Lanka populations. This might be due to a low proportion of nullipara women in our Hospital. There is also a possibility of misclassification (group 1 misclassified as group 10) since we determined gestational based new-born birth weight. |
| <b>Step 2:</b> Size of Group 3+4  | 30%                             | 46.5%                          | 37.3%                  | 37.81%             | Multiparous in our population 58.9%         | Rate higher than Robson reference population, in line with Sri Lanka reference population and lower than MCS examples. This may be explained by a high proportion of multiparous women in our population                                                                                                          |
| <b>Step 3:</b> Size of group 5    | Half of the total CS rate       | 7.2%                           | 10.9%                  | 9.04%              | -                                           | Lower than half of total CS. This, as suggested by the WHO manual, may be due to relatively low CS rate in the previous years, or to a recently increased CS rate or misclassification.                                                                                                                           |
| <b>Step 4:</b> size of group 6+7  | 3-4%                            | 2.7%                           | 3.4%                   | 2.77%              | -                                           | Rate is in line with Robson, MCS and Sri Lanka reference populations                                                                                                                                                                                                                                              |
| <b>Step 5:</b> Size of group 8    | 1.5-2%                          | 0.9%                           | 1.1%                   | 3.85%              | 36.7% of women delivered in our Hospitals   | Rate is higher than Robson, MCS and Sri Lanka reference populations. This may be due to high referral cases in our hospital as suggested by the WHO manual.                                                                                                                                                       |

|                                                            |                   |           |           |           |                                                                            |                                                                                                                                                                                                                                                                                                                                                    |
|------------------------------------------------------------|-------------------|-----------|-----------|-----------|----------------------------------------------------------------------------|----------------------------------------------------------------------------------------------------------------------------------------------------------------------------------------------------------------------------------------------------------------------------------------------------------------------------------------------------|
|                                                            |                   |           |           |           | 15.1% of all women who gave birth in our hospital delivered preterm birth. | Rate is higher than Robson, MCS and Sri Lanka reference populations. This may be due to high referral cases and high preterm birth in our hospital. The hospital is a tertiary hospital were most high-risk pregnancies referred to. There is also a possibility of misclassification since we determined gestational based new-born birth weight. |
| <b>Step 6:</b> Size of group 10                            | <10%              | 4.2%      | 7.8%      | 13.14%    | 15.1% of all women who gave birth in our hospital delivered preterm birth. | Rate is higher than Robson, MCS and Sri Lanka reference populations. This may be due to high referral cases and high preterm birth in our hospital. The hospital is a tertiary hospital were most high-risk pregnancies referred to. There is also a possibility of misclassification since we determined gestational based new-born birth weight. |
| <b>Step 7:</b> Ratio of the size of group 1 versus group 2 | Ratio 2 or higher | Ratio 3.3 | Ratio 1.5 | Ratio 4.8 | -                                                                          | The rate in line with Robson and MCS example reference populations                                                                                                                                                                                                                                                                                 |
| <b>Step 8:</b> Ratio of size of group 3 versus group 4     | >2:1              | Ratio 6.3 | Ratio 2.6 | Ratio 8.6 | -                                                                          | Rate in line with Robson and MCS example reference populations                                                                                                                                                                                                                                                                                     |
| <b>Step 9:</b> Ratio of size of group 6 versus group 7     | Usually 2:1       | Ratio 0.8 | Ratio 1.2 | Ratio 0.7 | Multiparous in our population 58.9%                                        | The rate in line with MCS and Sri Lanka reference populations, but lower than Robson references. This may be explained by a high proportion of Multiparous women in our population.                                                                                                                                                                |

1  
2  
3  
4  
5  
6  
7  
8  
9  
10  
11  
12  
13  
14  
15  
16  
17  
18  
19  
20  
21  
22  
23  
24  
25  
26  
27  
28  
29  
30  
31  
32  
33  
34  
35  
36  
37  
38  
39  
40  
41  
42  
43  
44  
45  
46  
47

**Appendix 2:** Assessment of CS Rates among women who gave birth at Hawassa University Referral Hospital, Hawassa, South Ethiopia.

| <b>Steps for Interpretation</b>    | <b>Interpretation by Robson</b>     | <b>Example: MCS Population</b> | <b>Sri Lanka study</b> | <b>Our finding</b> | <b>Additional information from the data</b>                                      | <b>Final Interpretation</b>                                                                                                                                                                                                                                                                     |
|------------------------------------|-------------------------------------|--------------------------------|------------------------|--------------------|----------------------------------------------------------------------------------|-------------------------------------------------------------------------------------------------------------------------------------------------------------------------------------------------------------------------------------------------------------------------------------------------|
| <b>Step 1:</b> CS rate in group 1  | Under 10% are achievable            | 9.8%                           | 18.8%                  | 27.5%              | 35.0% of CS delivery is due to Abnormal foetal heartbeat pattern in our hospital | CS rate is higher than Robson, MCS, and Sri Lanka. This might due to a high ratio of group 1 to group 2 population in our study which indicates a higher CS rate in these groups as suggested by the WHO manual. It might also due to inappropriate indications of CS delivery in our hospital. |
| <b>Step 2:</b> CS rate in group 2  | Consistently around 20%–35%         | 39.8%                          | 41.0%                  | 42.7%              | - Failed induction was an indication in 36.0% of group 2a.                       | CS rate in line with Sri Lanka, but higher than MCS and Robson references. This may be possibly due to inappropriate indications of CS in the induction of labour and pre-labour CS.                                                                                                            |
| <b>Step 3:</b> CS rate in Group 3  | Not higher than 3.0%.               | 3.0%                           | 5.2%                   | 16.7%              | -Obstructed labour was an indication in 51.5%.                                   | CS rate is higher than Robson, MCS, and Sri Lanka. This may be explained by misclassification (group 5 misclassified as group 3).                                                                                                                                                               |
| <b>Step 4:</b> CS rate for group 4 | It rarely should be higher than 15% | 23.7%                          | 16.8%                  | 43.04%             | Failed induction was an indication in 24.0% of group 4a.                         | CS rate is higher than Robson, MCS, and Sri Lanka. There was a high CS rate in group 4a (26.8%) which contributed to the high CS rate in group 4 in our study. The possible explanation may high failed induction or there might be misclassifications (group 5 misclassified as group 4).      |

|                                                                                  |                                                                        |                                 |                               |                               |                                                                              |                                                                                                                                                                                                                                                                  |
|----------------------------------------------------------------------------------|------------------------------------------------------------------------|---------------------------------|-------------------------------|-------------------------------|------------------------------------------------------------------------------|------------------------------------------------------------------------------------------------------------------------------------------------------------------------------------------------------------------------------------------------------------------|
| <b>Step 5:</b> CS rate in group 5                                                | Rates of 50%– 60% are considered appropriate                           | 74.4%                           | 81.8%                         | 77.6%                         | Previous CS was the indication in 72.8%. Rate of prelabour CS was 33.9%      | CS rate is higher than Robson and MCS examples but lower than the Sri Lanka study. This may be due to a high indication of CS due to previous CS, low offer of a trial of labour or VBAC (Vaginal birth after CS delivery), women's preference for repeating CS. |
| <b>Step 6:</b> CS rate for group 8                                               | Usually around 60%                                                     | 57.7%                           | 80.9%                         | 59.1%                         | -                                                                            | CS rate in line with Robson and MCS example.                                                                                                                                                                                                                     |
| <b>Step 7:</b> CS rate in group 10                                               | Usually around 30%                                                     | 25.1%                           | 41.1%                         | 26.05%                        | -                                                                            | CS rate in line with Robson and MCS example                                                                                                                                                                                                                      |
| <b>Step 8:</b> Relative contribution of groups 1, 2 and 5 to the overall CS rate | Normally contribute to 2/3 (66%) of all CS performed in most hospitals | Contributed to 63.7% of all CS  | 63.9%                         | 51.7%                         | The relative contribution of group 2 to the overall CS rate was low (7.38%). | CS rate lower than Robson, MCS example and Sri Lanka study. This may be due to the relative contribution of group 2 to the overall CS rate which was low. The size of group 2 may also be contributed due to the misclassification of the pre-term as a term.    |
| <b>Step 9:</b> Absolute contribution of group 5 to overall CS rate               | NA                                                                     | Responsible for 28.9% of all CS | Absolute contribution: 8.87%  | Absolute contribution: 7.02%  | -                                                                            | The absolute contribution was not indicated in the WHO Robson manual, but our study finding was lower than the MCS example and Sri Lanka study.                                                                                                                  |
|                                                                                  |                                                                        |                                 | Relative contribution: 29.59% | Relative contribution: 21.39% |                                                                              |                                                                                                                                                                                                                                                                  |

# STROBE\_ Cross sectional Check list

|                           | Reporting Item                                                                                                                                              | Page Number |
|---------------------------|-------------------------------------------------------------------------------------------------------------------------------------------------------------|-------------|
| <b>Title and abstract</b> |                                                                                                                                                             |             |
| Title                     | <a href="#">#1a</a> Indicate the study's design with a commonly used term in the title or the abstract                                                      | 1           |
| Abstract                  | <a href="#">#1b</a> Provide in the abstract an informative and balanced summary of what was done and what was found                                         | 1           |
| <b>Introduction</b>       |                                                                                                                                                             |             |
| Background / rationale    | <a href="#">#2</a> Explain the scientific background and rationale for the investigation being reported                                                     | 3           |
| Objectives                | <a href="#">#3</a> State specific objectives, including any prespecified hypotheses                                                                         | 4           |
| <b>Methods</b>            |                                                                                                                                                             |             |
| Study design              | <a href="#">#4</a> Present key elements of study design early in the paper                                                                                  | 4           |
| Setting                   | <a href="#">#5</a> Describe the setting, locations, and relevant dates, including periods of recruitment, exposure, follow-up, and data collection          | 4           |
| Eligibility criteria      | <a href="#">#6a</a> Give the eligibility criteria, and the sources and methods of selection of participants.                                                | 4           |
|                           | <a href="#">#7</a> Clearly define all outcomes, exposures, predictors, potential confounders, and effect modifiers. Give diagnostic criteria, if applicable | 5           |

|    |                |                      |                                                        |                             |
|----|----------------|----------------------|--------------------------------------------------------|-----------------------------|
| 1  | Data sources / | <a href="#">#8</a>   | For each variable of interest give sources of data and | 5,6                         |
| 2  | measurement    |                      | details of methods of assessment (measurement).        |                             |
| 3  |                |                      | Describe comparability of assessment methods if        |                             |
| 4  |                |                      | there is more than one group. Give information         |                             |
| 5  |                |                      | separately for for exposed and unexposed groups if     |                             |
| 6  |                |                      | applicable.                                            |                             |
| 7  |                |                      |                                                        |                             |
| 8  |                |                      |                                                        |                             |
| 9  |                |                      |                                                        |                             |
| 10 |                |                      |                                                        |                             |
| 11 |                |                      |                                                        |                             |
| 12 | Bias           | <a href="#">#9</a>   | Describe any efforts to address potential sources of   | 6                           |
| 13 |                |                      | bias                                                   |                             |
| 14 |                |                      |                                                        |                             |
| 15 |                |                      |                                                        |                             |
| 16 | Study size     | <a href="#">#10</a>  | Explain how the study size was arrived at              | N/A, we have included all   |
| 17 |                |                      |                                                        | laboring mothers during the |
| 18 |                |                      |                                                        | study period.               |
| 19 |                |                      |                                                        |                             |
| 20 |                |                      |                                                        |                             |
| 21 |                |                      |                                                        |                             |
| 22 | Quantitative   | <a href="#">#11</a>  | Explain how quantitative variables were handled in     | 5                           |
| 23 | variables      |                      | the analyses. If applicable, describe which groupings  |                             |
| 24 |                |                      | were chosen, and why                                   |                             |
| 25 |                |                      |                                                        |                             |
| 26 |                |                      |                                                        |                             |
| 27 |                |                      |                                                        |                             |
| 28 | Statistical    | <a href="#">#12a</a> | Describe all statistical methods, including those used | 6,7                         |
| 29 | methods        |                      | to control for confounding                             |                             |
| 30 |                |                      |                                                        |                             |
| 31 |                |                      |                                                        |                             |
| 32 | Statistical    | <a href="#">#12b</a> | Describe any methods used to examine subgroups         | N/A, our study was purely   |
| 33 | methods        |                      | and interactions                                       | descriptive                 |
| 34 |                |                      |                                                        |                             |
| 35 |                |                      |                                                        |                             |
| 36 |                |                      |                                                        |                             |
| 37 | Statistical    | <a href="#">#12c</a> | Explain how missing data were addressed                | 7                           |
| 38 | methods        |                      |                                                        |                             |
| 39 |                |                      |                                                        |                             |
| 40 |                |                      |                                                        |                             |
| 41 | Statistical    | <a href="#">#12d</a> | If applicable, describe analytical methods taking      | N/A, our study design       |
| 42 | methods        |                      | account of sampling strategy                           | descriptive and no sampling |
| 43 |                |                      |                                                        | strategy used               |
| 44 |                |                      |                                                        |                             |
| 45 |                |                      |                                                        |                             |
| 46 |                |                      |                                                        |                             |
| 47 | Statistical    | <a href="#">#12e</a> | Describe any sensitivity analyses                      | N/A, we used WHO Robson     |
| 48 | methods        |                      |                                                        | implementation manual to    |
| 49 |                |                      |                                                        | assess misclassification    |
| 50 |                |                      |                                                        | among Robson's group        |
| 51 |                |                      |                                                        |                             |
| 52 |                |                      |                                                        |                             |
| 53 |                |                      |                                                        |                             |
| 54 |                |                      |                                                        |                             |

## Results

|    |              |                      |                                                |   |
|----|--------------|----------------------|------------------------------------------------|---|
| 55 | Participants | <a href="#">#13a</a> | Report numbers of individuals at each stage of | 8 |
|----|--------------|----------------------|------------------------------------------------|---|

study—eg numbers potentially eligible, examined for eligibility, confirmed eligible, included in the study, completing follow-up, and analysed. Give information separately for exposed and unexposed groups if applicable.

|    |                  |                                                                                                                                                                                                                                        |                                |
|----|------------------|----------------------------------------------------------------------------------------------------------------------------------------------------------------------------------------------------------------------------------------|--------------------------------|
| 1  |                  |                                                                                                                                                                                                                                        |                                |
| 2  |                  |                                                                                                                                                                                                                                        |                                |
| 3  |                  |                                                                                                                                                                                                                                        |                                |
| 4  |                  |                                                                                                                                                                                                                                        |                                |
| 5  |                  |                                                                                                                                                                                                                                        |                                |
| 6  |                  |                                                                                                                                                                                                                                        |                                |
| 7  |                  |                                                                                                                                                                                                                                        |                                |
| 8  |                  |                                                                                                                                                                                                                                        |                                |
| 9  |                  |                                                                                                                                                                                                                                        |                                |
| 10 | Participants     | <a href="#">#13b</a> Give reasons for non-participation at each stage                                                                                                                                                                  | 8                              |
| 11 |                  |                                                                                                                                                                                                                                        |                                |
| 12 | Participants     | <a href="#">#13c</a> Consider use of a flow diagram                                                                                                                                                                                    | 8, we used text description    |
| 13 |                  |                                                                                                                                                                                                                                        | instead of flow diagram        |
| 14 |                  |                                                                                                                                                                                                                                        |                                |
| 15 |                  |                                                                                                                                                                                                                                        |                                |
| 16 | Descriptive data | <a href="#">#14a</a> Give characteristics of study participants (eg demographic, clinical, social) and information on exposures and potential confounders. Give information separately for exposed and unexposed groups if applicable. | 8,9                            |
| 17 |                  |                                                                                                                                                                                                                                        |                                |
| 18 |                  |                                                                                                                                                                                                                                        |                                |
| 19 |                  |                                                                                                                                                                                                                                        |                                |
| 20 |                  |                                                                                                                                                                                                                                        |                                |
| 21 |                  |                                                                                                                                                                                                                                        |                                |
| 22 |                  |                                                                                                                                                                                                                                        |                                |
| 23 |                  |                                                                                                                                                                                                                                        |                                |
| 24 |                  |                                                                                                                                                                                                                                        |                                |
| 25 |                  |                                                                                                                                                                                                                                        |                                |
| 26 | Descriptive data | <a href="#">#14b</a> Indicate number of participants with missing data for each variable of interest                                                                                                                                   | 9, 10                          |
| 27 |                  |                                                                                                                                                                                                                                        |                                |
| 28 |                  |                                                                                                                                                                                                                                        |                                |
| 29 |                  |                                                                                                                                                                                                                                        |                                |
| 30 | Outcome data     | <a href="#">#15</a> Report numbers of outcome events or summary measures. Give information separately for exposed and unexposed groups if applicable.                                                                                  | 9, 10, 11                      |
| 31 |                  |                                                                                                                                                                                                                                        |                                |
| 32 |                  |                                                                                                                                                                                                                                        |                                |
| 33 |                  |                                                                                                                                                                                                                                        |                                |
| 34 |                  |                                                                                                                                                                                                                                        |                                |
| 35 |                  |                                                                                                                                                                                                                                        |                                |
| 36 | Main results     | <a href="#">#16a</a> Give unadjusted estimates and, if applicable, confounder-adjusted estimates and their precision (eg, 95% confidence interval). Make clear which confounders were adjusted for and why they were included          | N/A, our study was descriptive |
| 37 |                  |                                                                                                                                                                                                                                        |                                |
| 38 |                  |                                                                                                                                                                                                                                        |                                |
| 39 |                  |                                                                                                                                                                                                                                        |                                |
| 40 |                  |                                                                                                                                                                                                                                        |                                |
| 41 |                  |                                                                                                                                                                                                                                        |                                |
| 42 |                  |                                                                                                                                                                                                                                        |                                |
| 43 |                  |                                                                                                                                                                                                                                        |                                |
| 44 |                  |                                                                                                                                                                                                                                        |                                |
| 45 | Main results     | <a href="#">#16b</a> Report category boundaries when continuous variables were categorized                                                                                                                                             | 9,10,11                        |
| 46 |                  |                                                                                                                                                                                                                                        |                                |
| 47 |                  |                                                                                                                                                                                                                                        |                                |
| 48 |                  |                                                                                                                                                                                                                                        |                                |
| 49 |                  |                                                                                                                                                                                                                                        |                                |
| 50 | Main results     | <a href="#">#16c</a> If relevant, consider translating estimates of relative risk into absolute risk for a meaningful time period                                                                                                      | N/A, our study was descriptive |
| 51 |                  |                                                                                                                                                                                                                                        |                                |
| 52 |                  |                                                                                                                                                                                                                                        |                                |
| 53 |                  |                                                                                                                                                                                                                                        |                                |
| 54 | Other analyses   | <a href="#">#17</a> Report other analyses done—e.g., analyses of subgroups and interactions, and sensitivity analyses                                                                                                                  | N/A, our study was descriptive |
| 55 |                  |                                                                                                                                                                                                                                        |                                |
| 56 |                  |                                                                                                                                                                                                                                        |                                |
| 57 |                  |                                                                                                                                                                                                                                        |                                |
| 58 |                  |                                                                                                                                                                                                                                        |                                |
| 59 |                  |                                                                                                                                                                                                                                        |                                |
| 60 |                  |                                                                                                                                                                                                                                        |                                |

1 **Discussion**

2

3

4 Key results [#18](#) Summarise key results with reference to study 14

5 objectives

6

7

8 Limitations [#19](#) Discuss limitations of the study, taking into account 14

9 sources of potential bias or imprecision. Discuss

10 both direction and magnitude of any potential bias.

11

12

13

14 Interpretation [#20](#) Give a cautious overall interpretation considering 14-18

15 objectives, limitations, multiplicity of analyses,

16 results from similar studies, and other relevant

17 evidence.

18

19

20

21 Generalisability [#21](#) Discuss the generalisability (external validity) of the 14

22 study results

23

24

25 **Other**

26 **Information**

27

28

29

30 Funding [#22](#) Give the source of funding and the role of the 19

31 funders for the present study and, if applicable, for

32 the original study on which the present article is

33 based

34

35

36

37

38

39

40

41

42

43

44

45

46

47

48

49

50

51

52

53

54

55

56

57

58

59

60
