# Supplementary material for: Caesarean section rates analysed using Robson’s 10-Group Classification System: a cross-sectional study at a tertiary hospital in Ethiopia
Source: PubMed Central journal article supplement — BMJ Open. 2020 Oct 28;10(10):e039098. doi: 10.1136/bmjopen-2020-039098 (PMC7594350; doi:10.1136/bmjopen-2020-039098), 2020-10-28
Supplement: bmjopen-2020-039098supp001.pdf [file bmjopen-2020-039098supp001.pdf]

**Appendix 1:** Assessment of the type of Populations among women who gave birth at Hawassa University Referral Hospital, Hawassa, South Ethiopia.

| <b>Steps for Interpretation</b>   | <b>Interpretation by Robson</b> | <b>Example: MCS Population</b> | <b>Sri Lanka study</b> | <b>Our finding</b> | <b>Additional information from the data</b> | <b>Final Interpretation</b>                                                                                                                                                                                                                                                                                       |
|-----------------------------------|---------------------------------|--------------------------------|------------------------|--------------------|---------------------------------------------|-------------------------------------------------------------------------------------------------------------------------------------------------------------------------------------------------------------------------------------------------------------------------------------------------------------------|
| <b>Step 1:</b> Size of group 1+ 2 | 35-42%                          | 38.1%                          | 38.1%                  | 32.99%             | Nulliparas in our population 41.1%          | Rate is lower than all the three references by Robson, MCS and Sri Lanka populations. This might be due to a low proportion of nullipara women in our Hospital. There is also a possibility of misclassification (group 1 misclassified as group 10) since we determined gestational based new-born birth weight. |
| <b>Step 2:</b> Size of Group 3+4  | 30%                             | 46.5%                          | 37.3%                  | 37.81%             | Multiparous in our population 58.9%         | Rate higher than Robson reference population, in line with Sri Lanka reference population and lower than MCS examples. This may be explained by a high proportion of multiparous women in our population                                                                                                          |
| <b>Step 3:</b> Size of group 5    | Half of the total CS rate       | 7.2%                           | 10.9%                  | 9.04%              | -                                           | Lower than half of total CS. This, as suggested by the WHO manual, may be due to relatively low CS rate in the previous years, or to a recently increased CS rate or misclassification.                                                                                                                           |
| <b>Step 4:</b> size of group 6+7  | 3-4%                            | 2.7%                           | 3.4%                   | 2.77%              | -                                           | Rate is in line with Robson, MCS and Sri Lanka reference populations                                                                                                                                                                                                                                              |
| <b>Step 5:</b> Size of group 8    | 1.5-2%                          | 0.9%                           | 1.1%                   | 3.85%              | 36.7% of women delivered in our Hospitals   | Rate is higher than Robson, MCS and Sri Lanka reference populations. This may be due to high referral cases in our hospital as suggested by the WHO manual.                                                                                                                                                       |

|                                                            |                   |           |           |           |                                                                            |                                                                                                                                                                                                                                                                                                                                                    |
|------------------------------------------------------------|-------------------|-----------|-----------|-----------|----------------------------------------------------------------------------|----------------------------------------------------------------------------------------------------------------------------------------------------------------------------------------------------------------------------------------------------------------------------------------------------------------------------------------------------|
|                                                            |                   |           |           |           | 15.1% of all women who gave birth in our hospital delivered preterm birth. | Rate is higher than Robson, MCS and Sri Lanka reference populations. This may be due to high referral cases and high preterm birth in our hospital. The hospital is a tertiary hospital were most high-risk pregnancies referred to. There is also a possibility of misclassification since we determined gestational based new-born birth weight. |
| <b>Step 6:</b> Size of group 10                            | <10%              | 4.2%      | 7.8%      | 13.14%    | 15.1% of all women who gave birth in our hospital delivered preterm birth. | Rate is higher than Robson, MCS and Sri Lanka reference populations. This may be due to high referral cases and high preterm birth in our hospital. The hospital is a tertiary hospital were most high-risk pregnancies referred to. There is also a possibility of misclassification since we determined gestational based new-born birth weight. |
| <b>Step 7:</b> Ratio of the size of group 1 versus group 2 | Ratio 2 or higher | Ratio 3.3 | Ratio 1.5 | Ratio 4.8 | -                                                                          | The rate in line with Robson and MCS example reference populations                                                                                                                                                                                                                                                                                 |
| <b>Step 8:</b> Ratio of size of group 3 versus group 4     | >2:1              | Ratio 6.3 | Ratio 2.6 | Ratio 8.6 | -                                                                          | Rate in line with Robson and MCS example reference populations                                                                                                                                                                                                                                                                                     |
| <b>Step 9:</b> Ratio of size of group 6 versus group 7     | Usually 2:1       | Ratio 0.8 | Ratio 1.2 | Ratio 0.7 | Multiparous in our population 58.9%                                        | The rate in line with MCS and Sri Lanka reference populations, but lower than Robson references. This may be explained by a high proportion of Multiparous women in our population.                                                                                                                                                                |
