# Supplementary material for: Caesarean section rates analysed using Robson’s 10-Group Classification System: a cross-sectional study at a tertiary hospital in Ethiopia
Source: PubMed Central journal article supplement — BMJ Open. 2020 Oct 28;10(10):e039098. doi: 10.1136/bmjopen-2020-039098 (PMC7594350; doi:10.1136/bmjopen-2020-039098), 2020-10-28
Supplement: bmjopen-2020-039098supp002.pdf [file bmjopen-2020-039098supp002.pdf]

**Appendix 2:** Assessment of CS Rates among women who gave birth at Hawassa University Referral Hospital, Hawassa, South Ethiopia.

| <b>Steps for Interpretation</b>    | <b>Interpretation by Robson</b>     | <b>Example: MCS Population</b> | <b>Sri Lanka study</b> | <b>Our finding</b> | <b>Additional information from the data</b>                                      | <b>Final Interpretation</b>                                                                                                                                                                                                                                                                     |
|------------------------------------|-------------------------------------|--------------------------------|------------------------|--------------------|----------------------------------------------------------------------------------|-------------------------------------------------------------------------------------------------------------------------------------------------------------------------------------------------------------------------------------------------------------------------------------------------|
| <b>Step 1:</b> CS rate in group 1  | Under 10% are achievable            | 9.8%                           | 18.8%                  | 27.5%              | 35.0% of CS delivery is due to Abnormal foetal heartbeat pattern in our hospital | CS rate is higher than Robson, MCS, and Sri Lanka. This might due to a high ratio of group 1 to group 2 population in our study which indicates a higher CS rate in these groups as suggested by the WHO manual. It might also due to inappropriate indications of CS delivery in our hospital. |
| <b>Step 2:</b> CS rate in group 2  | Consistently around 20%–35%         | 39.8%                          | 41.0%                  | 42.7%              | - Failed induction was an indication in 36.0% of group 2a.                       | CS rate in line with Sri Lanka, but higher than MCS and Robson references. This may be possibly due to inappropriate indications of CS in the induction of labour and pre-labour CS.                                                                                                            |
| <b>Step 3:</b> CS rate in Group 3  | Not higher than 3.0%.               | 3.0%                           | 5.2%                   | 16.7%              | -Obstructed labour was an indication in 51.5%.                                   | CS rate is higher than Robson, MCS, and Sri Lanka. This may be explained by misclassification (group 5 misclassified as group 3).                                                                                                                                                               |
| <b>Step 4:</b> CS rate for group 4 | It rarely should be higher than 15% | 23.7%                          | 16.8%                  | 43.04%             | Failed induction was an indication in 24.0% of group 4a.                         | CS rate is higher than Robson, MCS, and Sri Lanka. There was a high CS rate in group 4a (26.8%) which contributed to the high CS rate in group 4 in our study. The possible explanation may high failed induction or there might be misclassifications (group 5 misclassified as group 4).      |

|                                                                                  |                                                                        |                                 |                                                               |                                                               |                                                                              |                                                                                                                                                                                                                                                                  |
|----------------------------------------------------------------------------------|------------------------------------------------------------------------|---------------------------------|---------------------------------------------------------------|---------------------------------------------------------------|------------------------------------------------------------------------------|------------------------------------------------------------------------------------------------------------------------------------------------------------------------------------------------------------------------------------------------------------------|
| <b>Step 5:</b> CS rate in group 5                                                | Rates of 50%–60% are considered appropriate                            | 74.4%                           | 81.8%                                                         | 77.6%                                                         | Previous CS was the indication in 72.8%. Rate of prelabour CS was 33.9%      | CS rate is higher than Robson and MCS examples but lower than the Sri Lanka study. This may be due to a high indication of CS due to previous CS, low offer of a trial of labour or VBAC (Vaginal birth after CS delivery), women's preference for repeating CS. |
| <b>Step 6:</b> CS rate for group 8                                               | Usually around 60%                                                     | 57.7%                           | 80.9%                                                         | 59.1%                                                         | -                                                                            | CS rate in line with Robson and MCS example.                                                                                                                                                                                                                     |
| <b>Step 7:</b> CS rate in group 10                                               | Usually around 30%                                                     | 25.1%                           | 41.1%                                                         | 26.05%                                                        | -                                                                            | CS rate in line with Robson and MCS example                                                                                                                                                                                                                      |
| <b>Step 8:</b> Relative contribution of groups 1, 2 and 5 to the overall CS rate | Normally contribute to 2/3 (66%) of all CS performed in most hospitals | Contributed to 63.7% of all CS  | 63.9%                                                         | 51.7%                                                         | The relative contribution of group 2 to the overall CS rate was low (7.38%). | CS rate lower than Robson, MCS example and Sri Lanka study. This may be due to the relative contribution of group 2 to the overall CS rate which was low. The size of group 2 may also be contributed due to the misclassification of the pre-term as a term.    |
| <b>Step 9:</b> Absolute contribution of group 5 to overall CS rate               | NA                                                                     | Responsible for 28.9% of all CS | Absolute contribution: 8.87%<br>Relative contribution: 29.59% | Absolute contribution: 7.02%<br>Relative contribution: 21.39% | -                                                                            | The absolute contribution was not indicated in the WHO Robson manual, but our study finding was lower than the MCS example and Sri Lanka study.                                                                                                                  |
